# Supplementary material for: Tau mediates the reshaping of the transcriptional landscape toward intermediate Alzheimer’s disease stages
Source: Frontiers journal article supplement (doi:10.3389/fcell.2024.1459573), 2025-01-03
Supplement: Data_Sheet_2.pdf [file Data_Sheet_2.pdf]

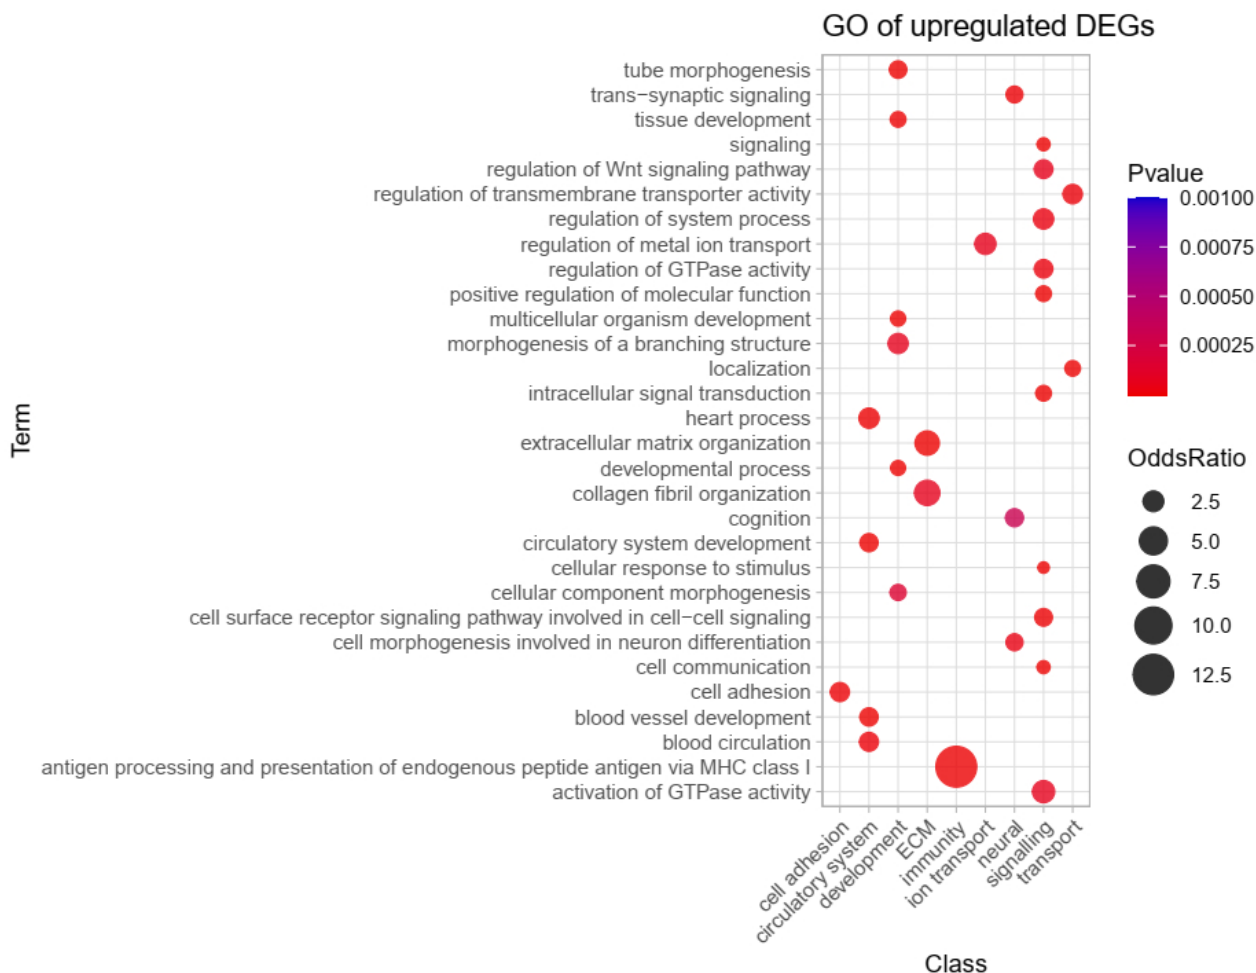

**Suppl. Fig 1. GO overrepresentation analysis of upregulated pathways.** GO for biological process was done on unregulated and down regulated DEGs separately. The most enriched terms from the GO for biological process, on the vertical axis, were classified into broader classes, which are plotted on the horizontal axis. The radius of the dot is proportional to the enrichment, and the color to the P value. Supplementary Table 3 for additional data.
