# Supplementary material for: Tau mediates the reshaping of the transcriptional landscape toward intermediate Alzheimer’s disease stages
Source: Front Cell Dev Biol. 2025 Jan 3;12:1459573. doi: 10.3389/fcell.2024.1459573 (PMC11739074; doi:10.3389/fcell.2024.1459573)
Supplement: Supplementary file 2 [file Table2.xlsx]

## Sheet: Sheet1
ID	KEGG pathway	Count	Size	P value	Genes
hsa04974	Protein digestion and absorption	20	104	1.37934e-05	COL1A1, COL4A1, COL4A2, COL5A1, COL6A1, COL6A2, COL7A1, COL8A2, COL9A1, COL9A2, COL11A2, CPA1, COL26A1, COL22A1, ATP1B2, SLC38A2, COL20A1, SLC3A2, COL18A1, COL27A1
hsa04141	Protein processing in endoplasmic reticulum	53	169	0.000203963	PDIA6, SEC23B, SEC23A, HYOU1, SEC63, TRAM1L1, DDIT3, STT3B, HSPA4L, ATF6, UBXN4, TRAM1, ERLEC1, DNAJC5G, PDIA3, UBQLN2, DNAJA1, HSPA5, HSP90AA1, LMAN1, MAN1A1, DERL2, MBTPS2, UBE2J1, DNAJB11, YOD1, SELENOS, DNAJC3, ERO1B, UGGT1, OSTC, RPN1, RPN2, RRBP1, SEL1L, SKP1, SSR1, SEC62, HSP90B1, TRAF2, UBE2D1, XBP1, DERL1, TUSC3, EDEM3, CALR, CANX, MAGT1, BAG2, PDIA4, EDEM1, HERPUD1, SEC24D
hsa04261	Adrenergic signaling in cardiomyocytes	33	154	0.000260587	ADCY5, CREB1, ATF2, AGT, PLCB1, GNAQ, GNAS, ATP1B2, ATP2A1, ATP2A2, ATP2A3, ATP2B1, ATP2B2, ATP2B4, PLCB2, PPP1CB, PPP1CC, PPP2CB, PPP2R5B, PRKACB, CACNA2D3, CACNG8, SCN1B, SCN4B, SCN5A, POPDC2, TNNI3, TPM2, CACNA2D1, CACNB1, CAMK2B, RPS6KA5, CACNA2D2
hsa04024	cAMP signaling pathway	45	226	0.000282498	PDE10A, ADCY5, CNGB1, ADORA1, CREB1, EDN2, EDN3, GIPR, GNAS, GRIA3, GRIN1, GRIN2D, HTR1E, JUN, LHB, PPP1R12A, ATP1B2, NPY, ATP2A1, ATP2A2, ATP2A3, ATP2B1, ATP2B2, ATP2B4, PLCE1, PDE4A, PIK3R1, PLD1, PPP1CB, PPP1CC, PRKACB, PTGER3, RAP1A, RAP1B, ROCK1, HCN2, RRAS, POPDC2, SOX9, BRAF, TNNI3, VIPR2, CAMK2B, PPP1R1B, GABBR2
hsa04512	ECM-receptor interaction	22	89	0.000285953	COL1A1, COL4A1, COL4A2, COL6A1, COL6A2, COL9A1, COL9A2, FREM1, LAMA1, HSPG2, ITGA2B, ITGA7, ITGB1, ITGB4, ITGB5, ITGB7, ITGB8, LAMA5, LAMB3, RELN, THBS4, TNXB
hsa04918	Thyroid hormone synthesis	18	75	0.000820681	ADCY5, CREB1, ATF2, PLCB1, GNAQ, GNAS, HSPA5, ITPR3, ASGR1, ATP1B2, DUOX2, PLCB2, PRKACB, PRKCG, TG, HSP90B1, CANX, PDIA4
hsa04925	Aldosterone synthesis and secretion	22	98	0.000914723	ADCY5, CREB1, ATF2, AGT, DAGLB, PLCB1, PRKD2, GNAQ, GNAS, NR4A1, ITPR3, LDLR, ATP1B2, ATP2B1, ATP2B2, ATP2B4, KCNK9, PLCB2, PRKACB, PRKCG, CAMK2B, CACNA1G
hsa04022	cGMP-PKG signaling pathway	28	165	0.00103591	IRAG1, GNA13, ADCY5, CNGB1, ADORA1, CREB1, ATF2, PLCB1, GNA12, GNAQ, ITPR3, KCNJ8, PPP1R12A, NFATC4, ATP1B2, ATP2A1, ATP2A2, ATP2A3, ATP2B1, ATP2B2, ATP2B4, PLCB2, PPP1CB, PPP1CC, PPP3CA, RGS2, ROCK1, IRS2
hsa05414	Dilated cardiomyopathy	25	105	0.00124731	ADCY5, DMD, AGT, GNAS, LAMA1, ITGA2B, ITGA7, ITGB1, ITGB4, ITGB5, ITGB7, ITGB8, ATP2A1, ATP2A2, ATP2A3, PRKACB, CACNA2D3, CACNG8, SGCB, TGFB1, TNNI3, TPM2, CACNA2D1, CACNB1, CACNA2D2
hsa04919	Thyroid hormone signaling pathway	19	122	0.00160779	NCOA2, PLCD3, PLCB1, KAT2A, ATP1B2, NOTCH1, NOTCH3, ATP2A1, ATP2A2, ATP2A3, NRAS, PLCE1, PFKL, PIK3R1, PLCB2, PLCD1, PRKACB, PRKCG, MED30
hsa04933	AGE-RAGE signaling pathway in diabetic complications	25	101	0.00204279	CDKN1B, PLCD3, COL1A1, COL4A1, COL4A2, AGER, AGT, EGR1, VEGFD, PLCB1, ICAM1, JUN, SMAD2, SMAD3, SMAD4, MMP2, NRAS, PLCE1, PIK3R1, PLCB2, PLCD1, PRKCD, CCL2, TGFB1, TGFBR1
hsa05031	Amphetamine addiction	18	69	0.00207822	ADCY5, CREB1, ATF2, ARC, SIRT1, GNAS, GRIA3, GRIN1, GRIN2D, JUN, PPP1CB, PPP1CC, PPP3CA, PRKACB, PRKCG, SLC18A2, CAMK2B, PPP1R1B
hsa04926	Relaxin signaling pathway	26	130	0.00254909	ADCY5, COL1A1, COL4A1, COL4A2, CREB1, ATF2, EGFR, VEGFD, PLCB1, SHC2, GNAS, GNG7, INSL3, JUN, SMAD2, MMP2, NOS2, NRAS, PIK3R1, PLCB2, PRKACB, ACTA2, SHC1, SOS2, TGFB1, TGFBR1
hsa05206	MicroRNAs in cancer	40	312	0.00270746	HDAC5, CDK6, CDKN1A, CDKN1B, RASSF1, EGFR, ERBB2, ERBB3, FGFR3, DICER1, SIRT1, GLS2, GLS, HOXD10, MARCKS, MMP16, NOTCH1, NOTCH3, NRAS, PDGFRB, PIK3R1, PLAU, DDIT4, PRKCG, RDX, ROCK1, SHC1, BMI1, SLC7A1, BMPR2, SOS2, SOX4, ZEB1, TNXB, SLC45A3, IRS2, CCNG1, BMF, RPS6KA5, ZEB2
hsa04820	Cytoskeleton in muscle cells	51	232	0.00295002	COL1A1, COL4A1, COL4A2, COL5A1, COL6A1, COL6A2, COL9A1, COL9A2, COL11A2, CSRP2, DMD, ENO3, FBLN2, NID2, FLNC, LAMA1, HSPG2, ITGA2B, ITGA7, ITGB1, ITGB4, ITGB5, ITGB7, ITGB8, JUP, LBR, MYL5, NID1, ATP1B2, MYOZ2, TRIM54, MYH7B, SPTBN4, MYL7, INF2, SGCB, SPTAN1, THBS4, TNNI3, TNNT1, TNNT3, TPM2, FMNL1, CAPZA2, OBSCN, COL27A1, MYOM1, ACTN2, PDLIM1, PDLIM7, SDC3
hsa04928	Parathyroid hormone synthesis, secretion and action	29	115	0.00464548	CDKN1A, GNA13, ADCY5, CREB1, ATF2, SLC34A3, EGFR, EGR1, FGFR1, PLCB1, GNA12, GNAQ, GNAS, ITPR3, JUND, LRP6, LRP5, MMP14, MMP16, MMP17, PDE4A, PLCB2, PLD1, PRKACB, PRKCG, PTH1R, WNK4, WNK3, BRAF
hsa05412	Arrhythmogenic right ventricular cardiomyopathy	22	86	0.00471909	DMD, LAMA1, ITGA2B, ITGA7, ITGB1, ITGB4, ITGB5, ITGB7, ITGB8, JUP, ATP2A1, ATP2A2, ATP2A3, LEF1, CACNA2D3, CACNG8, SGCB, CACNA2D1, CACNB1, TCF7L1, ACTN2, CACNA2D2
hsa05214	Glioma	14	76	0.00578067	CDK6, CDKN1A, DDB2, EGFR, SHC2, NRAS, PDGFRB, PIK3R1, PRKCG, RB1, SHC1, SOS2, BRAF, CAMK2B
hsa04151	PI3K-Akt signaling pathway	67	362	0.00659032	SGK2, CDK6, CDKN1A, CDKN1B, YWHAQ, COL1A1, COL4A1, COL4A2, COL6A1, COL6A2, COL9A1, COL9A2, CREB1, ATF2, CSF1, EGFR, EPHA2, EIF4EBP1, EPOR, ERBB2, ERBB3, ERBB4, FGF1, FGFR1, FGFR3, FGFR4, VEGFD, GNG7, LAMA1, PKN3, HGF, NR4A1, HSP90AA1, ITGA2B, ITGA7, ITGB1, ITGB4, ITGB5, ITGB7, ITGB8, JAK3, LAMA5, LAMB3, KITLG, NGF, NGFR, NRAS, NRTN, PCK2, PDGFRB, PGF, PIK3R1, DDIT4, PPP2CB, PPP2R5B, PRKAA1, PRKAA…
hsa04020	Calcium signaling pathway	49	254	0.00789552	PLCD3, CHRNA7, EGFR, ERBB2, ERBB3, ERBB4, PTK2B, FGF1, FGFR1, FGFR3, FGFR4, VEGFD, PLCB1, GNAQ, GNAS, GRIN1, GRIN2D, HGF, ITPKA, ITPKB, ITPR3, ASPH, NFATC4, NGF, NOS2, ATP2A1, ATP2A2, ATP2A3, ATP2B1, ATP2B2, ATP2B4, P2RX4, P2RX7, PLCE1, PDGFRB, PLCB2, PLCD1, TPCN1, PPP3CA, PRKACB, PRKCG, PTGER1, PTGER3, PTGFR, RYR1, CACNA1E, CAMK2B, SPHK1, CACNA1G
hsa04972	Pancreatic secretion	21	103	0.0095336	ADCY5, CPA1, PLCB1, AMY1B, GNAQ, GNAS, AMY2A, AMY2B, ITPR3, ATP1B2, ATP2A1, ATP2A2, ATP2A3, ATP2B1, ATP2B2, ATP2B4, PLCB2, PRKCG, RAP1A, RAP1B, TRPC1
hsa05165	Human papillomavirus infection	64	333	0.00957512	CDK6, CDKN1A, CDKN1B, COL1A1, COL4A1, COL4A2, COL6A1, COL6A2, COL9A1, COL9A2, CREB1, TICAM1, DLG2, EGFR, EIF4EBP1, UBR4, ATP6V1C2, TUBG2, GNAS, LAMA1, HLA-B, HLA-C, HLA-E, IRF3, ITGA2B, ITGA7, ITGB1, ITGB4, ITGB5, ITGB7, ITGB8, LAMA5, LAMB3, LLGL2, MFNG, NOTCH1, NOTCH3, NRAS, PDGFRB, ATP6V1A, PIK3R1, PPP2CB, PPP2R5B, PRKACB, RELN, RB1, RPS6KB1, SOS2, THBS4, TNXB, UBE3A, WNT6, WNT10B, FZD5, FZD4, …
hsa05210	Colorectal cancer	19	87	0.00979363	CDKN1A, DCC, DDB2, EGFR, JUN, SMAD2, SMAD3, SMAD4, MSH2, NRAS, LEF1, PIK3R1, PMAIP1, RPS6KB1, SOS2, BRAF, TGFB1, TGFBR1, TCF7L1
hsa00564	Glycerophospholipid metabolism	21	103	0.0110359	AGPAT2, GPAT4, DGKA, DGKQ, LCLAT1, LPCAT4, SGMS1, PNPLA7, LCAT, ACHE, PLD1, ETNK2, AGPAT5, ETNK1, PLA2G6, DGKD, PLA2G4C, PLPP2, PLPP3, DGKI, LPGAT1
hsa04730	Long-term depression	14	60	0.0161316	GNA13, PLCB1, GNA12, GNAQ, GNAS, GRIA3, ITPR3, NRAS, PLCB2, PPP2CB, PRKCG, RYR1, BRAF, PLA2G4C
hsa04961	Endocrine and other factor-regulated calcium reabsorption	14	53	0.0166411	CLTA, CLTC, DNM1, PLCB1, GNAQ, GNAS, ATP1B2, ATP2B1, ATP2B2, ATP2B4, PLCB2, PRKACB, PRKCG, PTH1R
hsa04814	Motor proteins	36	195	0.0168545	KIF3A, KIF12, DNAH2, DYNC1I1, KIF21B, DNAI1, TUBG2, MYO1H, KIF5B, KIF25, MYL5, MYO1E, MYO5A, MYO7A, DYNC1LI1, DCTN4, MYO15A, TUBE1, KIF26B, ACTR10, STARD9, KIF17, MYH7B, MYL7, ACTA2, DYNLT2, TNNI3, TNNT1, TNNT3, TPM2, TUBA4A, MYO15B, CAPZA2, DNAL1, HOOK3, TUBB6
hsa04727	GABAergic synapse	18	89	0.0175705	SLC38A3, ADCY5, GABRB3, GABRD, GAD1, GLS2, GLS, GNG7, PLCL1, SLC38A2, PRKACB, PRKCG, SLC12A5, SLC6A1, SLC6A12, TRAK2, SLC38A1, GABBR2
hsa04970	Salivary secretion	16	94	0.0182064	ADCY5, CST3, PLCB1, AMY1B, GNAQ, GNAS, AMY2A, AMY2B, ITPR3, ATP1B2, ATP2B1, ATP2B2, ATP2B4, PLCB2, PRKACB, PRKCG
hsa04068	FoxO signaling pathway	27	133	0.0185413	SGK2, CDKN1A, CDKN1B, PLK2, AGAP2, EGFR, SIRT1, SMAD3, SMAD4, NRAS, PCK2, PIK3R1, PRKAA1, PRKAA2, SLC2A4, SOD2, SOS2, BRAF, TGFB1, TGFBR1, SETD7, CCNB3, IRS2, CCNG2, ATG12, HOMER3, HOMER1
hsa04510	Focal adhesion	48	202	0.0199123	BUB1B-PAK6, COL1A1, COL4A1, COL4A2, COL6A1, COL6A2, COL9A1, COL9A2, EGFR, EMP2, ERBB2, VEGFD, SHC2, LAMA1, HGF, BIRC2, ITGA2B, ITGA7, ITGB1, ITGB4, ITGB5, ITGB7, ITGB8, JUN, LAMA5, LAMB3, ARHGAP5, MYL5, PPP1R12A, PAK2, PDGFRB, PGF, PIK3R1, PPP1CB, PPP1CC, PRKCG, RELN, PAK6, PAK5, MYL7, RAP1A, RAP1B, ROCK1, SHC1, SOS2, BRAF, THBS4, TNXB, ACTN4
hsa04360	Axon guidance	44	183	0.0206921	SEMA3A, SEMA6C, SEMA6B, BUB1B-PAK6, GDF7, DCC, DPYSL2, EFNB2, EPHA2, EPHA8, EPHB3, EPHB4, PLXNB2, NGEF, RND1, ITGB1, MYL5, NFATC4, NRAS, PAK2, PIK3R1, SSH3, PPP3CA, PAK6, RGMA, PAK5, SEMA4G, RGS3, ROCK1, RRAS, SEMA3F, SEMA4A, ROBO3, BMPR1B, BMPR2, SMO, TRPC1, SEMA3B, CAMK2B, PARD6B, NTNG2, UNC5A, BOC, SLIT2, SRGAP3
hsa05410	Hypertrophic cardiomyopathy	25	99	0.0243806	ACE, DMD, AGT, LAMA1, ITGA2B, ITGA7, ITGB1, ITGB4, ITGB5, ITGB7, ITGB8, ATP2A1, ATP2A2, ATP2A3, PRKAA1, PRKAA2, CACNA2D3, CACNG8, SGCB, TGFB1, TNNI3, TPM2, CACNA2D1, CACNB1, CACNA2D2
hsa04921	Oxytocin signaling pathway	31	154	0.0244243	CDKN1A, ADCY5, EGFR, PLCB1, GNAQ, GNAS, ITPR3, JUN, KCNJ2, KCNJ9, PPP1R12A, NFATC4, NRAS, PLCB2, PPP1CB, PPP1CC, PPP3CA, PRKAA1, PRKAA2, PRKACB, CACNA2D3, PRKCG, CACNG8, RGS2, ROCK1, RYR1, CACNA2D1, CACNB1, CAMK2B, PLA2G4C, CACNA2D2
hsa01521	EGFR tyrosine kinase inhibitor resistance	17	80	0.0286854	EGFR, EIF4EBP1, ERBB2, ERBB3, FGFR3, SHC2, GAS6, HGF, NRAS, PDGFRB, PIK3R1, PRKCG, RPS6, RPS6KB1, SHC1, SOS2, BRAF
hsa04613	Neutrophil extracellular trap formation	16	192	0.0313539	HDAC5, CYBA, AGER, PLCB1, H2AZ1, H2BC5, ITGA2B, PIK3R1, PLCB2, PRKCG, AZU1, MAP3K7, H2AC19, H2AC6, H2AC18, H2AW
hsa04218	Cellular senescence	31	157	0.0331283	HIPK3, CDK6, CDKN1A, CHEK2, LIN54, E2F5, EIF4EBP1, HIPK1, FBXW11, SIRT1, HLA-B, HLA-C, HLA-E, HUS1, ITPR3, SMAD2, SMAD3, NFATC4, NRAS, PIK3R1, PPP1CB, PPP1CC, PPP3CA, LIN37, RAD9A, RB1, RBBP4, RRAS, TGFB1, TGFBR1, CCNB3
hsa04148	Efferocytosis	30	157	0.0332793	ADAM10, CEBPB, CREB1, AGER, DUSP8, EPOR, SIRT1, GAS6, ATP11C, ANO9, ITGB5, MFGE8, NFATC4, ATP2A1, ATP2A2, ATP2A3, ODC1, GULP1, RAB14, PPARG, ADGRB1, TGFB1, CALR, CAMK2B, PLA2G6, MEGF11, HAVCR2, ADAM9, SPHK1, ELMO1
hsa04927	Cortisol synthesis and secretion	15	65	0.0361211	ADCY5, CREB1, ATF2, AGT, PLCB1, GNAQ, GNAS, NR4A1, ITPR3, LDLR, PDE8A, PLCB2, PRKACB, PDE8B, CACNA1G
hsa05223	Non-small cell lung cancer	15	73	0.0369192	CDK6, CDKN1A, RASSF1, DDB2, EGFR, ERBB2, HGF, JAK3, KIF5B, NRAS, PIK3R1, PRKCG, RB1, SOS2, BRAF
hsa05166	Human T-cell leukemia virus 1 infection	43	223	0.0376359	CDKN1A, CDKN2C, ANAPC10, ADCY5, CHEK2, ANAPC16, CREB1, ATF2, EGR1, ELK4, ETS2, KAT2A, HLA-B, HLA-C, HLA-DMA, HLA-E, ICAM1, JAK3, JUN, MAD2L1, SMAD2, SMAD3, SMAD4, MAP3K1, MSX2, NFATC4, NFKB2, NFYB, NRAS, PIK3R1, PPP3CA, PRKACB, B2M, RB1, RELB, TGFB1, TGFBR1, ZFP36, CALR, CANX, IKBKG, MAP3K14, TBPL1
hsa05146	Amoebiasis	16	103	0.0418471	COL1A1, COL4A1, COL4A2, PLCB1, GNAQ, GNAS, LAMA1, LAMA5, LAMB3, NOS2, PIK3R1, PLCB2, PRKACB, PRKCG, TGFB1, ACTN4
hsa04350	TGF-beta signaling pathway	29	107	0.0434909	MICOS10-NBL1, GDF7, E2F5, EMP3, RGMB, ID4, IGSF1, INHBA, SMAD2, SMAD3, SMAD4, SMAD5, NBL1, PPP2CB, RGMA, TGIF2, ROCK1, RPS6KB1, SKIL, SKP1, BMPR1A, BMPR1B, BMPR2, TF, TFRC, TGFB1, TGFBR1, THSD4, CHRD, ACVR2B
hsa04270	Vascular smooth muscle contraction	27	134	0.044265	RAMP2, IRAG1, GNA13, ADCY5, ADM, AGT, EDN2, EDN3, PLCB1, GNA12, GNAQ, GNAS, ITPR3, PPP1R12A, PLCB2, PPP1CB, PPP1CC, PRKACB, PRKCD, PRKCG, PRKCH, ACTA2, ROCK1, BRAF, CALCA, PLA2G6, PLA2G4C
hsa05200	Pathways in cancer	96	533	0.0452664	CDK6, RASGRP2, CDKN1A, CDKN1B, GNA13, DLL3, ADCY5, RASSF1, COL4A1, COL4A2, CTBP2, DCC, DDB2, AGT, EGFR, EPAS1, EPOR, ERBB2, FGF1, FGFR1, FGFR3, FGFR4, VEGFD, PLCB1, GNA12, GNAQ, GNAS, GNG7, LAMA1, GSTM1, GSTM2, GSTM4, HGF, BIRC2, HSP90AA1, IL13RA1, ITGA2B, ITGB1, JAK3, JUN, JUP, LAMA5, LAMB3, LRP6, LRP5, SMAD2, SMAD3, SMAD4, KITLG, MMP2, MSH2, NFKB2, NOS2, NOTCH1, NOTCH3, NRAS, LEF1, PDGFRB, PGF,…
hsa00970	Aminoacyl-tRNA biosynthesis	11	45	0.0455541	WARS2, AARS1, EPRS1, GARS1, NARS1, AARS2, SARS1, TARS1, WARS1, CARS1, YARS1
hsa04216	Ferroptosis	12	42	0.0459404	ACSL6, SLC39A14, SLC7A11, GSS, SLC40A1, PCBP2, STEAP3, PRNP, SLC3A2, TF, TFRC, MAP1LC3A
hsa05034	Alcoholism	27	188	0.0465061	HDAC5, ADCY5, CREB1, ATF2, SHC2, GNAS, GNG7, GRIN1, GRIN2D, H2AZ1, H2BC5, SLC29A2, NPY, NRAS, PPP1CB, PPP1CC, PRKACB, PKIA, SHC1, SLC18A2, SOS2, BRAF, H2AC19, H2AC6, H2AC18, PPP1R1B, H2AW
hsa04060	Cytokine-cytokine receptor interaction	28	298	0.0479311	CSF1, GDF7, EPOR, GDF10, CCR10, RELL2, IL11RA, IL13RA1, INHBA, LIF, NGF, NGFR, TNFRSF12A, TNFRSF19, IL17RB, CCL2, BMPR1A, BMPR1B, BMPR2, TGFB1, TGFBR1, IL17RC, TNFRSF25, TNFRSF10B, IL32, ACVR2B, IL27RA, GDF15
