# Supplementary material for: Tau mediates the reshaping of the transcriptional landscape toward intermediate Alzheimer’s disease stages
Source: Front Cell Dev Biol. 2025 Jan 3;12:1459573. doi: 10.3389/fcell.2024.1459573 (PMC11739074; doi:10.3389/fcell.2024.1459573)
Supplement: Supplementary file 6 [file Table6.xlsx]

## Sheet: Darkgrey module GO
source	term_name	term_id	adjusted_p_value	negative_log10_of_adjusted_p_value	term_size	query_size	intersection_size	effective_domain_size	intersections
GO:MF	protein binding	GO:0005515	1.4625e-06	5.8349	14778	24	19	62649	ZBTB20,FAR1,DNAJC15,TEAD1,ZDHHC9,SNX9,NUDCD2,RBM22,RTF2,FGD4,MCMBP,KRCC1,KLHL5,STMP1,TMBIM4,MAP4K4,NFIA,CRIPT,ARMC1
GO:MF	binding	GO:0005488	2.95411e-06	5.52957	18286	24	20	62649	ZBTB20,FAR1,ZSWIM6,DNAJC15,TEAD1,ZDHHC9,SNX9,NUDCD2,RBM22,RTF2,FGD4,MCMBP,KRCC1,KLHL5,STMP1,TMBIM4,MAP4K4,NFIA,CRIPT,ARMC1
GO:MF	molecular_function	GO:0003674	1.19362e-05	4.92313	20171	24	20	62649	ZBTB20,FAR1,ZSWIM6,DNAJC15,TEAD1,ZDHHC9,SNX9,NUDCD2,RBM22,RTF2,FGD4,MCMBP,KRCC1,KLHL5,STMP1,TMBIM4,MAP4K4,NFIA,CRIPT,ARMC1
GO:MF	alcohol-forming fatty acyl-CoA reductase activity	GO:0102965	0.00195371	2.70914	2	3	1	62649	FAR1
GO:MF	fatty-acyl-CoA reductase (alcohol-forming) activity	GO:0080019	0.00195371	2.70914	2	3	1	62649	FAR1
GO:MF	Ras palmitoyltransferase activity	GO:0043849	0.00217082	2.66338	1	8	1	62649	ZDHHC9
GO:MF	cytoskeletal protein binding	GO:0008092	0.00663546	2.17813	1004	23	4	62649	FGD4,KLHL5,MAP4K4,CRIPT
GO:MF	phosphotransferase activity, nitrogenous group as acceptor	GO:0016775	0.0170822	1.76746	7	21	1	62649	MAP4K4
GO:MF	oxidoreductase activity, acting on the aldehyde or oxo group of donors, NAD or NADP as acceptor	GO:0016620	0.0170822	1.76746	40	3	1	62649	FAR1
GO:MF	1-phosphatidylinositol binding	GO:0005545	0.0170822	1.76746	14	9	1	62649	SNX9
GO:MF	ATPase activator activity	GO:0001671	0.0170822	1.76746	26	5	1	62649	DNAJC15
GO:MF	Arp2/3 complex binding	GO:0071933	0.0170822	1.76746	14	9	1	62649	SNX9
GO:MF	oxidoreductase activity, acting on the aldehyde or oxo group of donors	GO:0016903	0.0170822	1.76746	49	3	1	62649	FAR1
GO:MF	creatine kinase activity	GO:0004111	0.0170822	1.76746	6	21	1	62649	MAP4K4
GO:MF	protein-cysteine S-acyltransferase activity	GO:0019707	0.021136	1.67498	26	8	1	62649	ZDHHC9
GO:MF	protein-cysteine S-palmitoyltransferase activity	GO:0019706	0.021136	1.67498	26	8	1	62649	ZDHHC9
GO:MF	S-acyltransferase activity	GO:0016417	0.022948	1.63926	30	8	1	62649	ZDHHC9
GO:MF	DNA-binding transcription repressor activity, RNA polymerase II-specific	GO:0001227	0.0252746	1.59732	322	1	1	62649	ZBTB20
GO:MF	DNA-binding transcription repressor activity	GO:0001217	0.0252746	1.59732	326	1	1	62649	ZBTB20
GO:MF	microtubule binding	GO:0008017	0.0252746	1.59732	275	23	2	62649	MAP4K4,CRIPT
GO:MF	palmitoyltransferase activity	GO:0016409	0.0252746	1.59732	37	8	1	62649	ZDHHC9
GO:MF	cis-regulatory region sequence-specific DNA binding	GO:0000987	0.0312384	1.50531	1211	7	2	62649	ZBTB20,TEAD1
GO:MF	RNA polymerase II cis-regulatory region sequence-specific DNA binding	GO:0000978	0.0312384	1.50531	1191	7	2	62649	ZBTB20,TEAD1
GO:MF	actin binding	GO:0003779	0.0312384	1.50531	447	18	2	62649	FGD4,KLHL5
GO:MF	tubulin binding	GO:0015631	0.0353471	1.45165	383	23	2	62649	MAP4K4,CRIPT
GO:MF	DNA-binding transcription factor activity, RNA polymerase II-specific	GO:0000981	0.0360819	1.44271	1360	7	2	62649	ZBTB20,TEAD1
GO:MF	RNA polymerase II transcription regulatory region sequence-specific DNA binding	GO:0000977	0.0361637	1.44173	1407	7	2	62649	ZBTB20,TEAD1
GO:MF	DNA-binding transcription factor activity	GO:0003700	0.0361637	1.44173	1415	7	2	62649	ZBTB20,TEAD1
GO:MF	transcription cis-regulatory region binding	GO:0000976	0.0368218	1.43389	1504	7	2	62649	ZBTB20,TEAD1
GO:MF	DNA binding	GO:0003677	0.0368218	1.43389	2526	22	4	62649	ZBTB20,TEAD1,RTF2,NFIA
GO:MF	transcription regulatory region nucleic acid binding	GO:0001067	0.0368218	1.43389	1506	7	2	62649	ZBTB20,TEAD1
GO:MF	sequence-specific double-stranded DNA binding	GO:1990837	0.0382592	1.41726	1562	7	2	62649	ZBTB20,TEAD1
GO:MF	sequence-specific DNA binding	GO:0043565	0.0407837	1.38951	1667	7	2	62649	ZBTB20,TEAD1
GO:MF	double-stranded DNA binding	GO:0003690	0.0407837	1.38951	1663	7	2	62649	ZBTB20,TEAD1
GO:MF	transcription regulator activity	GO:0140110	0.0454953	1.34203	1929	7	2	62649	ZBTB20,TEAD1
GO:MF	cation binding	GO:0043169	0.0454953	1.34203	4368	15	4	62649	ZBTB20,ZSWIM6,RBM22,FGD4
GO:MF	metal ion binding	GO:0046872	0.0454953	1.34203	4275	15	4	62649	ZBTB20,ZSWIM6,RBM22,FGD4
GO:MF	calcium-dependent protein binding	GO:0048306	0.0454953	1.34203	82	13	1	62649	RBM22
GO:MF	unfolded protein binding	GO:0051082	0.0454953	1.34203	114	10	1	62649	NUDCD2
GO:MF	chromatin binding	GO:0003682	0.0454953	1.34203	594	22	2	62649	MCMBP,NFIA
GO:MF	U6 snRNA binding	GO:0017070	0.0454953	1.34203	86	13	1	62649	RBM22
