# Supplementary material for: Tau mediates the reshaping of the transcriptional landscape toward intermediate Alzheimer’s disease stages
Source: Front Cell Dev Biol. 2025 Jan 3;12:1459573. doi: 10.3389/fcell.2024.1459573 (PMC11739074; doi:10.3389/fcell.2024.1459573)
Supplement: Supplementary file 9 [file Table4.xlsx]

## Sheet: transcription
GO.term.accession	GO.term.name	Gene.name	Gene.description
GO:0000122	negative regulation of transcription by RNA polymerase II	AEBP1	AE binding protein 1
GO:0000977	RNA polymerase II transcription regulatory region sequence-specific DNA binding	AEBP1	AE binding protein 1
GO:0001227	DNA-binding transcription repressor activity, RNA polymerase II-specific	AEBP1	AE binding protein 1
GO:0006355	regulation of DNA-templated transcription	AEBP1	AE binding protein 1
GO:0045944	positive regulation of transcription by RNA polymerase II	AGAP2	ArfGAP with GTPase domain, ankyrin repeat and PH domain 2
GO:0051092	positive regulation of NF-kappaB transcription factor activity	AGER	advanced glycosylation end-product specific receptor
GO:0045944	positive regulation of transcription by RNA polymerase II	AGRN	agrin
GO:0003714	transcription corepressor activity	BTG2	BTG anti-proliferation factor 2
GO:0000122	negative regulation of transcription by RNA polymerase II	BTG2	BTG anti-proliferation factor 2
GO:0000439	transcription factor TFIIH core complex	ERCC2	ERCC excision repair 2, TFIIH core complex helicase subunit
GO:0005675	transcription factor TFIIH holo complex	ERCC2	ERCC excision repair 2, TFIIH core complex helicase subunit
GO:0006366	transcription by RNA polymerase II	ERCC2	ERCC excision repair 2, TFIIH core complex helicase subunit
GO:0005669	transcription factor TFIID complex	ERCC2	ERCC excision repair 2, TFIIH core complex helicase subunit
GO:0006283	transcription-coupled nucleotide-excision repair	ERCC2	ERCC excision repair 2, TFIIH core complex helicase subunit
GO:0006362	transcription elongation by RNA polymerase I	ERCC2	ERCC excision repair 2, TFIIH core complex helicase subunit
GO:0045944	positive regulation of transcription by RNA polymerase II	GRIN1	glutamate ionotropic receptor NMDA type subunit 1
GO:0006357	regulation of transcription by RNA polymerase II	HR	HR lysine demethylase and nuclear receptor corepressor
GO:0003712	transcription coregulator activity	HR	HR lysine demethylase and nuclear receptor corepressor
GO:0006355	regulation of DNA-templated transcription	JUN	Jun proto-oncogene, AP-1 transcription factor subunit
GO:0003700	DNA-binding transcription factor activity	JUN	Jun proto-oncogene, AP-1 transcription factor subunit
GO:0045893	positive regulation of DNA-templated transcription	JUN	Jun proto-oncogene, AP-1 transcription factor subunit
GO:0045944	positive regulation of transcription by RNA polymerase II	JUN	Jun proto-oncogene, AP-1 transcription factor subunit
GO:0000981	DNA-binding transcription factor activity, RNA polymerase II-specific	JUN	Jun proto-oncogene, AP-1 transcription factor subunit
GO:0006357	regulation of transcription by RNA polymerase II	JUN	Jun proto-oncogene, AP-1 transcription factor subunit
GO:0000976	transcription cis-regulatory region binding	JUN	Jun proto-oncogene, AP-1 transcription factor subunit
GO:0005667	transcription regulator complex	JUN	Jun proto-oncogene, AP-1 transcription factor subunit
GO:0045892	negative regulation of DNA-templated transcription	JUN	Jun proto-oncogene, AP-1 transcription factor subunit
GO:0001228	DNA-binding transcription activator activity, RNA polymerase II-specific	JUN	Jun proto-oncogene, AP-1 transcription factor subunit
GO:0001227	DNA-binding transcription repressor activity, RNA polymerase II-specific	JUN	Jun proto-oncogene, AP-1 transcription factor subunit
GO:0000122	negative regulation of transcription by RNA polymerase II	JUN	Jun proto-oncogene, AP-1 transcription factor subunit
GO:0090575	RNA polymerase II transcription regulator complex	JUN	Jun proto-oncogene, AP-1 transcription factor subunit
GO:0061629	RNA polymerase II-specific DNA-binding transcription factor binding	JUN	Jun proto-oncogene, AP-1 transcription factor subunit
GO:1902895	positive regulation of miRNA transcription	JUN	Jun proto-oncogene, AP-1 transcription factor subunit
GO:2000144	positive regulation of DNA-templated transcription initiation	JUN	Jun proto-oncogene, AP-1 transcription factor subunit
GO:0140296	general transcription initiation factor binding	JUN	Jun proto-oncogene, AP-1 transcription factor subunit
GO:0035976	transcription factor AP-1 complex	JUN	Jun proto-oncogene, AP-1 transcription factor subunit
GO:0043922	negative regulation by host of viral transcription	JUN	Jun proto-oncogene, AP-1 transcription factor subunit
GO:0043923	positive regulation by host of viral transcription	JUN	Jun proto-oncogene, AP-1 transcription factor subunit
GO:0006355	regulation of DNA-templated transcription	JUND	JunD proto-oncogene, AP-1 transcription factor subunit
GO:0003700	DNA-binding transcription factor activity	JUND	JunD proto-oncogene, AP-1 transcription factor subunit
GO:0000981	DNA-binding transcription factor activity, RNA polymerase II-specific	JUND	JunD proto-oncogene, AP-1 transcription factor subunit
GO:0006357	regulation of transcription by RNA polymerase II	JUND	JunD proto-oncogene, AP-1 transcription factor subunit
GO:0000976	transcription cis-regulatory region binding	JUND	JunD proto-oncogene, AP-1 transcription factor subunit
GO:0005667	transcription regulator complex	JUND	JunD proto-oncogene, AP-1 transcription factor subunit
GO:0000122	negative regulation of transcription by RNA polymerase II	JUND	JunD proto-oncogene, AP-1 transcription factor subunit
GO:0017053	transcription repressor complex	JUND	JunD proto-oncogene, AP-1 transcription factor subunit
GO:0090575	RNA polymerase II transcription regulator complex	JUND	JunD proto-oncogene, AP-1 transcription factor subunit
GO:0045944	positive regulation of transcription by RNA polymerase II	JUND	JunD proto-oncogene, AP-1 transcription factor subunit
GO:0035976	transcription factor AP-1 complex	JUND	JunD proto-oncogene, AP-1 transcription factor subunit
GO:0001221	transcription coregulator binding	JUND	JunD proto-oncogene, AP-1 transcription factor subunit
GO:0001228	DNA-binding transcription activator activity, RNA polymerase II-specific	JUND	JunD proto-oncogene, AP-1 transcription factor subunit
GO:0006355	regulation of DNA-templated transcription	NOTCH3	notch receptor 3
GO:1902895	positive regulation of miRNA transcription	NOTCH3	notch receptor 3
GO:0000122	negative regulation of transcription by RNA polymerase II	NOTCH3	notch receptor 3
GO:0045944	positive regulation of transcription by RNA polymerase II	NOTCH3	notch receptor 3
GO:0045893	positive regulation of DNA-templated transcription	SFRP1	secreted frizzled related protein 1
GO:0045892	negative regulation of DNA-templated transcription	SFRP1	secreted frizzled related protein 1
GO:0045944	positive regulation of transcription by RNA polymerase II	SLC38A3	solute carrier family 38 member 3
GO:0045944	positive regulation of transcription by RNA polymerase II	SREBF2	sterol regulatory element binding transcription factor 2
GO:0000981	DNA-binding transcription factor activity, RNA polymerase II-specific	SREBF2	sterol regulatory element binding transcription factor 2
GO:0001227	DNA-binding transcription repressor activity, RNA polymerase II-specific	SREBF2	sterol regulatory element binding transcription factor 2
GO:0000122	negative regulation of transcription by RNA polymerase II	SREBF2	sterol regulatory element binding transcription factor 2
GO:0000976	transcription cis-regulatory region binding	SREBF2	sterol regulatory element binding transcription factor 2
GO:0003700	DNA-binding transcription factor activity	SREBF2	sterol regulatory element binding transcription factor 2
GO:0006355	regulation of DNA-templated transcription	SREBF2	sterol regulatory element binding transcription factor 2
GO:1902895	positive regulation of miRNA transcription	SREBF2	sterol regulatory element binding transcription factor 2
GO:0006357	regulation of transcription by RNA polymerase II	ZNF692	zinc finger protein 692
GO:0003700	DNA-binding transcription factor activity	ZNF692	zinc finger protein 692
GO:0001227	DNA-binding transcription repressor activity, RNA polymerase II-specific	ZNF692	zinc finger protein 692
GO:0000122	negative regulation of transcription by RNA polymerase II	ZNF692	zinc finger protein 692
GO:0045944	positive regulation of transcription by RNA polymerase II	ACTR2	actin related protein 2
GO:0045944	positive regulation of transcription by RNA polymerase II	ACTR3	actin related protein 3
GO:0045944	positive regulation of transcription by RNA polymerase II	ARF4	ADP ribosylation factor 4
GO:0006357	regulation of transcription by RNA polymerase II	ARID4A	AT-rich interaction domain 4A
GO:0000976	transcription cis-regulatory region binding	ARID4A	AT-rich interaction domain 4A
GO:0000122	negative regulation of transcription by RNA polymerase II	ARID4A	AT-rich interaction domain 4A
GO:0045892	negative regulation of DNA-templated transcription	ARID4A	AT-rich interaction domain 4A
GO:0017053	transcription repressor complex	ARID4A	AT-rich interaction domain 4A
GO:0006366	transcription by RNA polymerase II	ARID4A	AT-rich interaction domain 4A
GO:0045944	positive regulation of transcription by RNA polymerase II	ARID4A	AT-rich interaction domain 4A
GO:0045893	positive regulation of DNA-templated transcription	ATMIN	ATM interactor
GO:0000981	DNA-binding transcription factor activity, RNA polymerase II-specific	ATMIN	ATM interactor
GO:0006357	regulation of transcription by RNA polymerase II	ATMIN	ATM interactor
GO:0001228	DNA-binding transcription activator activity, RNA polymerase II-specific	ATMIN	ATM interactor
GO:0045944	positive regulation of transcription by RNA polymerase II	ATMIN	ATM interactor
GO:0000976	transcription cis-regulatory region binding	ATMIN	ATM interactor
GO:0061629	RNA polymerase II-specific DNA-binding transcription factor binding	BBS10	Bardet-Biedl syndrome 10
GO:0045944	positive regulation of transcription by RNA polymerase II	BMPR1B	bone morphogenetic protein receptor type 1B
GO:0003714	transcription corepressor activity	C1D	C1D nuclear receptor corepressor
GO:0045892	negative regulation of DNA-templated transcription	C1D	C1D nuclear receptor corepressor
GO:0017053	transcription repressor complex	C1D	C1D nuclear receptor corepressor
GO:0000122	negative regulation of transcription by RNA polymerase II	C1QBP	complement C1q binding protein
GO:0003714	transcription corepressor activity	C1QBP	complement C1q binding protein
GO:0008134	transcription factor binding	C1QBP	complement C1q binding protein
GO:0000122	negative regulation of transcription by RNA polymerase II	CALR	calreticulin
GO:0045892	negative regulation of DNA-templated transcription	CALR	calreticulin
GO:0006355	regulation of DNA-templated transcription	CALR	calreticulin
GO:0000122	negative regulation of transcription by RNA polymerase II	CBX3	chromobox 3
GO:0045892	negative regulation of DNA-templated transcription	CBX3	chromobox 3
GO:0090575	RNA polymerase II transcription regulator complex	CBX3	chromobox 3
GO:0001221	transcription coregulator binding	CBX3	chromobox 3
GO:0032088	negative regulation of NF-kappaB transcription factor activity	CD200	CD200 molecule
GO:0032793	positive regulation of CREB transcription factor activity	CD200	CD200 molecule
GO:0045892	negative regulation of DNA-templated transcription	CDKN1B	cyclin dependent kinase inhibitor 1B
GO:0006355	regulation of DNA-templated transcription	CEBPB	CCAAT enhancer binding protein beta
GO:0003700	DNA-binding transcription factor activity	CEBPB	CCAAT enhancer binding protein beta
GO:0006351	DNA-templated transcription	CEBPB	CCAAT enhancer binding protein beta
GO:0000981	DNA-binding transcription factor activity, RNA polymerase II-specific	CEBPB	CCAAT enhancer binding protein beta
GO:0006357	regulation of transcription by RNA polymerase II	CEBPB	CCAAT enhancer binding protein beta
GO:0000122	negative regulation of transcription by RNA polymerase II	CEBPB	CCAAT enhancer binding protein beta
GO:0045944	positive regulation of transcription by RNA polymerase II	CEBPB	CCAAT enhancer binding protein beta
GO:0090575	RNA polymerase II transcription regulator complex	CEBPB	CCAAT enhancer binding protein beta
GO:0001227	DNA-binding transcription repressor activity, RNA polymerase II-specific	CEBPB	CCAAT enhancer binding protein beta
GO:0045893	positive regulation of DNA-templated transcription	CEBPB	CCAAT enhancer binding protein beta
GO:0000976	transcription cis-regulatory region binding	CEBPB	CCAAT enhancer binding protein beta
GO:0000977	RNA polymerase II transcription regulatory region sequence-specific DNA binding	CEBPB	CCAAT enhancer binding protein beta
GO:0001228	DNA-binding transcription activator activity, RNA polymerase II-specific	CEBPB	CCAAT enhancer binding protein beta
GO:0006366	transcription by RNA polymerase II	CEBPB	CCAAT enhancer binding protein beta
GO:0045892	negative regulation of DNA-templated transcription	CEBPB	CCAAT enhancer binding protein beta
GO:0045892	negative regulation of DNA-templated transcription	CNOT7	CCR4-NOT transcription complex subunit 7
GO:0140297	DNA-binding transcription factor binding	CNOT7	CCR4-NOT transcription complex subunit 7
GO:0003714	transcription corepressor activity	CNOT7	CCR4-NOT transcription complex subunit 7
GO:0045944	positive regulation of transcription by RNA polymerase II	CNOT7	CCR4-NOT transcription complex subunit 7
GO:0006366	transcription by RNA polymerase II	COPS2	COP9 signalosome subunit 2
GO:0000122	negative regulation of transcription by RNA polymerase II	COPS2	COP9 signalosome subunit 2
GO:0003714	transcription corepressor activity	COPS2	COP9 signalosome subunit 2
GO:0045892	negative regulation of DNA-templated transcription	COPS2	COP9 signalosome subunit 2
GO:0045944	positive regulation of transcription by RNA polymerase II	COPS5	COP9 signalosome subunit 5
GO:0003713	transcription coactivator activity	COPS5	COP9 signalosome subunit 5
GO:0051091	positive regulation of DNA-binding transcription factor activity	COPS5	COP9 signalosome subunit 5
GO:0031124	mRNA 3-end processing ENSG00000111605 CPSF6 cleavage and polyadenylation specific factor 6 [Source:HGNC Symbol;Acc:HGNC:13871] GO:0051262 protein tetramerization ENSG00000111605 CPSF6 cleavage and polyadenylation specific factor 6 [Source:HGNC Symbol;Acc:HGNC:13871] GO:0051290 protein heterotetramerization ENSG00000111605 CPSF6 cleavage and polyadenylation specific factor 6 [Source:HGNC Symbol;Ac…	DCP2	decapping mRNA 2
GO:0006355	regulation of DNA-templated transcription	DDIT3	DNA damage inducible transcript 3
GO:0003700	DNA-binding transcription factor activity	DDIT3	DNA damage inducible transcript 3
GO:0045893	positive regulation of DNA-templated transcription	DDIT3	DNA damage inducible transcript 3
GO:0000122	negative regulation of transcription by RNA polymerase II	DDIT3	DNA damage inducible transcript 3
GO:0000981	DNA-binding transcription factor activity, RNA polymerase II-specific	DDIT3	DNA damage inducible transcript 3
GO:0045892	negative regulation of DNA-templated transcription	DDIT3	DNA damage inducible transcript 3
GO:0001228	DNA-binding transcription activator activity, RNA polymerase II-specific	DDIT3	DNA damage inducible transcript 3
GO:0045944	positive regulation of transcription by RNA polymerase II	DDIT3	DNA damage inducible transcript 3
GO:0006357	regulation of transcription by RNA polymerase II	DDIT3	DNA damage inducible transcript 3
GO:0090575	RNA polymerase II transcription regulator complex	DDIT3	DNA damage inducible transcript 3
GO:0061629	RNA polymerase II-specific DNA-binding transcription factor binding	DDIT3	DNA damage inducible transcript 3
GO:0003714	transcription corepressor activity	DDIT3	DNA damage inducible transcript 3
GO:0000976	transcription cis-regulatory region binding	DDIT3	DNA damage inducible transcript 3
GO:0005667	transcription regulator complex	DDIT3	DNA damage inducible transcript 3
GO:0140416	transcription regulator inhibitor activity	DDIT3	DNA damage inducible transcript 3
GO:0140537	transcription regulator activator activity	DDIT3	DNA damage inducible transcript 3
GO:0043433	negative regulation of DNA-binding transcription factor activity	DDIT3	DNA damage inducible transcript 3
GO:0051091	positive regulation of DNA-binding transcription factor activity	DDIT3	DNA damage inducible transcript 3
GO:0045943	positive regulation of transcription by RNA polymerase I	DEK	DEK proto-oncogene
GO:0045944	positive regulation of transcription by RNA polymerase II	DEK	DEK proto-oncogene
GO:0045945	positive regulation of transcription by RNA polymerase III	DEK	DEK proto-oncogene
GO:0006366	transcription by RNA polymerase II	DEK	DEK proto-oncogene
GO:0006357	regulation of transcription by RNA polymerase II	DEK	DEK proto-oncogene
GO:0016891	endoribonuclease activity, producing 5-phosphomonoesters ENSG00000100697 DICER1 dicer 1, ribonuclease III [Source:HGNC Symbol;Acc:HGNC:17098] GO:0030422 siRNA processing ENSG00000100697 DICER1 dicer 1, ribonuclease III [Source:HGNC Symbol;Acc:HGNC:17098] GO:0031054 pre-miRNA processing ENSG00000100697 DICER1 dicer 1, ribonuclease III [Source:HGNC Symbol;Acc:HGNC:17098] GO:0010629 negative regulat…	ELAVL4	ELAV like RNA binding protein 4
GO:1905870	positive regulation of 3-UTR-mediated mRNA stabilization ENSG00000162374 ELAVL4 ELAV like RNA binding protein 4 [Source:HGNC Symbol;Acc:HGNC:3315] ENSG00000162374 ELAVL4 ELAV like RNA binding protein 4 [Source:HGNC Symbol;Acc:HGNC:3315] GO:0005515 protein binding ENSG00000162374 ELAVL4 ELAV like RNA binding protein 4 [Source:HGNC Symbol;Acc:HGNC:3315] GO:0003729 mRNA binding ENSG00000162374 ELAVL…	FMR1	fragile X messenger ribonucleoprotein 1
GO:0048027	mRNA 5-UTR binding ENSG00000102081 FMR1 fragile X messenger ribonucleoprotein 1 [Source:HGNC Symbol;Acc:HGNC:3775] GO:0034063 stress granule assembly ENSG00000102081 FMR1 fragile X messenger ribonucleoprotein 1 [Source:HGNC Symbol;Acc:HGNC:3775] GO:0045727 positive regulation of translation ENSG00000102081 FMR1 fragile X messenger ribonucleoprotein 1 [Source:HGNC Symbol;Acc:HGNC:3775] GO:1901386 …	HNRNPA3	heterogeneous nuclear ribonucleoprotein A3
GO:0045944	positive regulation of transcription by RNA polymerase II	HSPA5	heat shock protein family A (Hsp70) member 5
GO:0006357	regulation of transcription by RNA polymerase II	JADE3	jade family PHD finger 3
GO:0006355	regulation of DNA-templated transcription	JADE3	jade family PHD finger 3
GO:0045892	negative regulation of DNA-templated transcription	KHDRBS1	KH RNA binding domain containing, signal transduction associated 1
GO:0000122	negative regulation of transcription by RNA polymerase II	KHDRBS1	KH RNA binding domain containing, signal transduction associated 1
GO:0006355	regulation of DNA-templated transcription	LRIF1	ligand dependent nuclear receptor interacting factor 1
GO:0006355	regulation of DNA-templated transcription	MORF4L2	mortality factor 4 like 2
GO:0045893	positive regulation of DNA-templated transcription	MORF4L2	mortality factor 4 like 2
GO:0045944	positive regulation of transcription by RNA polymerase II	MOSPD1	motile sperm domain containing 1
GO:0000122	negative regulation of transcription by RNA polymerase II	MOSPD1	motile sperm domain containing 1
GO:0045893	positive regulation of DNA-templated transcription	MTDH	metadherin
GO:0006357	regulation of transcription by RNA polymerase II	MTDH	metadherin
GO:0000122	negative regulation of transcription by RNA polymerase II	MTDH	metadherin
GO:0061629	RNA polymerase II-specific DNA-binding transcription factor binding	MTDH	metadherin
GO:0003712	transcription coregulator activity	MTDH	metadherin
GO:0003713	transcription coactivator activity	MTDH	metadherin
GO:0051092	positive regulation of NF-kappaB transcription factor activity	MTDH	metadherin
GO:0000122	negative regulation of transcription by RNA polymerase II	N4BP2L2	NEDD4 binding protein 2 like 2
GO:0003714	transcription corepressor activity	N4BP2L2	NEDD4 binding protein 2 like 2
GO:0017053	transcription repressor complex	N4BP2L2	NEDD4 binding protein 2 like 2
GO:0045944	positive regulation of transcription by RNA polymerase II	NAMPT	nicotinamide phosphoribosyltransferase
GO:0045893	positive regulation of DNA-templated transcription	NEK4	NIMA related kinase 4
GO:0006355	regulation of DNA-templated transcription	NR3C1	nuclear receptor subfamily 3 group C member 1
GO:0003700	DNA-binding transcription factor activity	NR3C1	nuclear receptor subfamily 3 group C member 1
GO:0045944	positive regulation of transcription by RNA polymerase II	NR3C1	nuclear receptor subfamily 3 group C member 1
GO:0006357	regulation of transcription by RNA polymerase II	NR3C1	nuclear receptor subfamily 3 group C member 1
GO:0000981	DNA-binding transcription factor activity, RNA polymerase II-specific	NR3C1	nuclear receptor subfamily 3 group C member 1
GO:0045892	negative regulation of DNA-templated transcription	NR3C1	nuclear receptor subfamily 3 group C member 1
GO:0001227	DNA-binding transcription repressor activity, RNA polymerase II-specific	NR3C1	nuclear receptor subfamily 3 group C member 1
GO:0000122	negative regulation of transcription by RNA polymerase II	NR3C1	nuclear receptor subfamily 3 group C member 1
GO:0001228	DNA-binding transcription activator activity, RNA polymerase II-specific	NR3C1	nuclear receptor subfamily 3 group C member 1
GO:1902895	positive regulation of miRNA transcription	NR3C1	nuclear receptor subfamily 3 group C member 1
GO:0000977	RNA polymerase II transcription regulatory region sequence-specific DNA binding	NR3C1	nuclear receptor subfamily 3 group C member 1
GO:1901911		RPS7	ribosomal protein S7
GO:0048027		TDP2	tyrosyl-DNA phosphodiesterase 2
GO:0006392	transcription elongation by mitochondrial RNA polymerase	TEFM	transcription elongation factor, mitochondrial
GO:0006390	mitochondrial transcription	TEFM	transcription elongation factor, mitochondrial
GO:0006355	regulation of DNA-templated transcription	THAP1	THAP domain containing 1
GO:0006357	regulation of transcription by RNA polymerase II	THAP1	THAP domain containing 1
GO:0006351	DNA-templated transcription	THAP1	THAP domain containing 1
GO:0003700	DNA-binding transcription factor activity	THAP1	THAP domain containing 1
GO:0000981	DNA-binding transcription factor activity, RNA polymerase II-specific	THAP1	THAP domain containing 1
GO:0001227	DNA-binding transcription repressor activity, RNA polymerase II-specific	THAP1	THAP domain containing 1
GO:0000122	negative regulation of transcription by RNA polymerase II	THAP1	THAP domain containing 1
GO:0006357	regulation of transcription by RNA polymerase II	THAP10	THAP domain containing 10
GO:0003700	DNA-binding transcription factor activity	THAP10	THAP domain containing 10
GO:0035194	RNA-mediated post-transcriptional gene silencing	TSN	translin
GO:0045944	positive regulation of transcription by RNA polymerase II	UBE2E1	ubiquitin conjugating enzyme E2 E1
GO:0045893	positive regulation of DNA-templated transcription	USP16	ubiquitin specific peptidase 16
GO:0045944	positive regulation of transcription by RNA polymerase II	USP16	ubiquitin specific peptidase 16
GO:0006357	regulation of transcription by RNA polymerase II	USP16	ubiquitin specific peptidase 16
GO:0003713	transcription coactivator activity	USP16	ubiquitin specific peptidase 16
GO:0006355	regulation of DNA-templated transcription	XBP1	X-box binding protein 1
GO:0003700	DNA-binding transcription factor activity	XBP1	X-box binding protein 1
GO:0045944	positive regulation of transcription by RNA polymerase II	XBP1	X-box binding protein 1
GO:0000981	DNA-binding transcription factor activity, RNA polymerase II-specific	XBP1	X-box binding protein 1
GO:0000976	transcription cis-regulatory region binding	XBP1	X-box binding protein 1
GO:0000977	RNA polymerase II transcription regulatory region sequence-specific DNA binding	XBP1	X-box binding protein 1
GO:0006366	transcription by RNA polymerase II	XBP1	X-box binding protein 1
GO:0000122	negative regulation of transcription by RNA polymerase II	XBP1	X-box binding protein 1
GO:0006357	regulation of transcription by RNA polymerase II	XBP1	X-box binding protein 1
GO:0090575	RNA polymerase II transcription regulator complex	XBP1	X-box binding protein 1
GO:0045892	negative regulation of DNA-templated transcription	YWHAQ	tyrosine 3-monooxygenase/tryptophan 5-monooxygenase activation protein theta
GO:0045944	positive regulation of transcription by RNA polymerase II	ZBED4	zinc finger BED-type containing 4
GO:0000976	transcription cis-regulatory region binding	ZBED4	zinc finger BED-type containing 4
GO:0000981	DNA-binding transcription factor activity, RNA polymerase II-specific	ZBED4	zinc finger BED-type containing 4
GO:0001228	DNA-binding transcription activator activity, RNA polymerase II-specific	ZBED4	zinc finger BED-type containing 4
GO:0000977	RNA polymerase II transcription regulatory region sequence-specific DNA binding	ZBED4	zinc finger BED-type containing 4
GO:0003700	DNA-binding transcription factor activity	ZEB2	zinc finger E-box binding homeobox 2
GO:0006357	regulation of transcription by RNA polymerase II	ZEB2	zinc finger E-box binding homeobox 2
GO:0045892	negative regulation of DNA-templated transcription	ZEB2	zinc finger E-box binding homeobox 2
GO:0000122	negative regulation of transcription by RNA polymerase II	ZEB2	zinc finger E-box binding homeobox 2
GO:0000981	DNA-binding transcription factor activity, RNA polymerase II-specific	ZEB2	zinc finger E-box binding homeobox 2
GO:0045944	positive regulation of transcription by RNA polymerase II	ZEB2	zinc finger E-box binding homeobox 2
GO:0001227	DNA-binding transcription repressor activity, RNA polymerase II-specific	ZEB2	zinc finger E-box binding homeobox 2
GO:0006357	regulation of transcription by RNA polymerase II	ZNF107	zinc finger protein 107
GO:0045944	positive regulation of transcription by RNA polymerase II	ZNF107	zinc finger protein 107
GO:0001228	DNA-binding transcription activator activity, RNA polymerase II-specific	ZNF107	zinc finger protein 107
GO:0006355	regulation of DNA-templated transcription	ZNF107	zinc finger protein 107
GO:0006357	regulation of transcription by RNA polymerase II	ZNF148	zinc finger protein 148
GO:0000122	negative regulation of transcription by RNA polymerase II	ZNF148	zinc finger protein 148
GO:0003700	DNA-binding transcription factor activity	ZNF148	zinc finger protein 148
GO:0045892	negative regulation of DNA-templated transcription	ZNF148	zinc finger protein 148
GO:0001227	DNA-binding transcription repressor activity, RNA polymerase II-specific	ZNF148	zinc finger protein 148
GO:0045944	positive regulation of transcription by RNA polymerase II	ZNF148	zinc finger protein 148
GO:0006355	regulation of DNA-templated transcription	ZNF22	zinc finger protein 22
GO:0003700	DNA-binding transcription factor activity	ZNF22	zinc finger protein 22
GO:0006355	regulation of DNA-templated transcription	ZNF268	zinc finger protein 268
GO:0045944	positive regulation of transcription by RNA polymerase II	ZNF268	zinc finger protein 268
GO:0006357	regulation of transcription by RNA polymerase II	ZNF268	zinc finger protein 268
GO:0003700	DNA-binding transcription factor activity	ZNF268	zinc finger protein 268
GO:0000122	negative regulation of transcription by RNA polymerase II	ZNF268	zinc finger protein 268
GO:0001228	DNA-binding transcription activator activity, RNA polymerase II-specific	ZNF268	zinc finger protein 268
GO:0045893	positive regulation of DNA-templated transcription	ZNF281	zinc finger protein 281
GO:0000981	DNA-binding transcription factor activity, RNA polymerase II-specific	ZNF281	zinc finger protein 281
GO:0003700	DNA-binding transcription factor activity	ZNF281	zinc finger protein 281
GO:0000976	transcription cis-regulatory region binding	ZNF281	zinc finger protein 281
GO:0006355	regulation of DNA-templated transcription	ZNF281	zinc finger protein 281
GO:0045892	negative regulation of DNA-templated transcription	ZNF281	zinc finger protein 281
GO:0001227	DNA-binding transcription repressor activity, RNA polymerase II-specific	ZNF281	zinc finger protein 281
GO:0000122	negative regulation of transcription by RNA polymerase II	ZNF281	zinc finger protein 281
GO:0000981	DNA-binding transcription factor activity, RNA polymerase II-specific	ZNF518A	zinc finger protein 518A
GO:0006357	regulation of transcription by RNA polymerase II	ZNF518A	zinc finger protein 518A
GO:0000977	RNA polymerase II transcription regulatory region sequence-specific DNA binding	ZNF518A	zinc finger protein 518A
GO:0006355	regulation of DNA-templated transcription	ZNHIT3	zinc finger HIT-type containing 3

## Sheet: chromatin
GO.term.accession	GO.term.name	Gene.name	Gene.description
GO:0006338	chromatin remodeling	HR	HR lysine demethylase and nuclear receptor corepressor
GO:0000785	chromatin	HR	HR lysine demethylase and nuclear receptor corepressor
GO:0031490	chromatin DNA binding	HR	HR lysine demethylase and nuclear receptor corepressor
GO:0000785	chromatin	JUN	Jun proto-oncogene, AP-1 transcription factor subunit
GO:0000791	euchromatin	JUN	Jun proto-oncogene, AP-1 transcription factor subunit
GO:0000785	chromatin	JUND	JunD proto-oncogene, AP-1 transcription factor subunit
GO:0000785	chromatin	SREBF2	sterol regulatory element binding transcription factor 2
GO:0006325	chromatin organization	ARID4A	AT-rich interaction domain 4A
GO:0006325	chromatin organization	ASF1A	anti-silencing function 1A histone chaperone
GO:0000785	chromatin	ASF1A	anti-silencing function 1A histone chaperone
GO:0003682	chromatin binding	ASF1A	anti-silencing function 1A histone chaperone
GO:0140861	DNA repair-dependent chromatin remodeling	ASF1A	anti-silencing function 1A histone chaperone
GO:0006335	DNA replication-dependent chromatin assembly	ASF1A	anti-silencing function 1A histone chaperone
GO:0006325	chromatin organization	CBX3	chromobox 3
GO:0006338	chromatin remodeling	CBX3	chromobox 3
GO:0000785	chromatin	CBX3	chromobox 3
GO:0003682	chromatin binding	CBX3	chromobox 3
GO:0000792	heterochromatin	CBX3	chromobox 3
GO:0031507	heterochromatin formation	CBX3	chromobox 3
GO:0000791	euchromatin	CBX3	chromobox 3
GO:0005721	pericentric heterochromatin	CBX3	chromobox 3
GO:0061793	chromatin lock complex	CBX3	chromobox 3
GO:0000785	chromatin	CEBPB	CCAAT enhancer binding protein beta
GO:0003682	chromatin binding	CEBPB	CCAAT enhancer binding protein beta
GO:0031490	chromatin DNA binding	CEBPB	CCAAT enhancer binding protein beta
GO:0000785	chromatin	COPS5	COP9 signalosome subunit 5
GO:0031124	mRNA 3-end processing ENSG00000111605 CPSF6 cleavage and polyadenylation specific factor 6 [Source:HGNC Symbol;Acc:HGNC:13871] GO:0051262 protein tetramerization ENSG00000111605 CPSF6 cleavage and polyadenylation specific factor 6 [Source:HGNC Symbol;Acc:HGNC:13871] GO:0051290 protein heterotetramerization ENSG00000111605 CPSF6 cleavage and polyadenylation specific factor 6 [Source:HGNC Symbol;Ac…	DCP2	decapping mRNA 2
GO:0000785	chromatin	DDIT3	DNA damage inducible transcript 3
GO:0006325	chromatin organization	DEK	DEK proto-oncogene
GO:0006338	chromatin remodeling	DEK	DEK proto-oncogene
GO:1905870	positive regulation of 3-UTR-mediated mRNA stabilization ENSG00000162374 ELAVL4 ELAV like RNA binding protein 4 [Source:HGNC Symbol;Acc:HGNC:3315] ENSG00000162374 ELAVL4 ELAV like RNA binding protein 4 [Source:HGNC Symbol;Acc:HGNC:3315] GO:0005515 protein binding ENSG00000162374 ELAVL4 ELAV like RNA binding protein 4 [Source:HGNC Symbol;Acc:HGNC:3315] GO:0003729 mRNA binding ENSG00000162374 ELAVL…	FMR1	fragile X messenger ribonucleoprotein 1
GO:0003682	chromatin binding	FMR1	fragile X messenger ribonucleoprotein 1
GO:0048027	mRNA 5-UTR binding ENSG00000102081 FMR1 fragile X messenger ribonucleoprotein 1 [Source:HGNC Symbol;Acc:HGNC:3775] GO:0034063 stress granule assembly ENSG00000102081 FMR1 fragile X messenger ribonucleoprotein 1 [Source:HGNC Symbol;Acc:HGNC:3775] GO:0045727 positive regulation of translation ENSG00000102081 FMR1 fragile X messenger ribonucleoprotein 1 [Source:HGNC Symbol;Acc:HGNC:3775] GO:1901386 …	HNRNPA3	heterogeneous nuclear ribonucleoprotein A3
GO:0006325	chromatin organization	MORF4L2	mortality factor 4 like 2
GO:0003682	chromatin binding	MSH2	mutS homolog 2
GO:0071168	protein localization to chromatin	MSH2	mutS homolog 2
GO:0006325	chromatin organization	NR3C1	nuclear receptor subfamily 3 group C member 1
GO:0000785	chromatin	NR3C1	nuclear receptor subfamily 3 group C member 1
GO:1901911		RPS7	ribosomal protein S7
GO:0048027		TDP2	tyrosyl-DNA phosphodiesterase 2
GO:0000785	chromatin	THAP1	THAP domain containing 1
GO:0000785	chromatin	TSPYL1	TSPY like 1
GO:0003682	chromatin binding	TSPYL1	TSPY like 1
GO:0000785	chromatin	TSPYL5	TSPY like 5
GO:0003682	chromatin binding	TSPYL5	TSPY like 5
GO:0000785	chromatin	UBE2B	ubiquitin conjugating enzyme E2 B
GO:0006325	chromatin organization	UBE2B	ubiquitin conjugating enzyme E2 B
GO:0006325	chromatin organization	USP16	ubiquitin specific peptidase 16
GO:0006338	chromatin remodeling	USP16	ubiquitin specific peptidase 16
GO:0031490	chromatin DNA binding	XBP1	X-box binding protein 1
GO:0000785	chromatin	ZBED4	zinc finger BED-type containing 4
GO:0000785	chromatin	ZEB2	zinc finger E-box binding homeobox 2
GO:0006325	chromatin organization	ZNF518A	zinc finger protein 518A

## Sheet: acetylation
GO.term.accession	GO.term.name	Gene.name	Gene.description
GO:0035066	positive regulation of histone acetylation	DEK	DEK proto-oncogene
GO:1901985	positive regulation of protein acetylation	XBP1	X-box binding protein 1

## Sheet: methylation
GO.term.accession	GO.term.name	Gene.name	Gene.description
GO:0033169	histone H3-K9 demethylation	HR	HR lysine demethylase and nuclear receptor corepressor
GO:0006306	DNA methylation	ARID4A	AT-rich interaction domain 4A
GO:0032259	methylation	ARMT1	acidic residue methyltransferase 1
GO:0048027		TDP2	tyrosyl-DNA phosphodiesterase 2
GO:0080009	mRNA methylation	WTAP	WT1 associated protein
GO:0031062	positive regulation of histone methylation	XBP1	X-box binding protein 1

## Sheet: histone
GO.term.accession	GO.term.name	Gene.name	Gene.description
GO:0032454	histone H3K9 demethylase activity	HR	HR lysine demethylase and nuclear receptor corepressor
GO:0033169	histone H3-K9 demethylation	HR	HR lysine demethylase and nuclear receptor corepressor
GO:0140683	histone H3K9me/H3K9me2 demethylase activity	HR	HR lysine demethylase and nuclear receptor corepressor
GO:0000118	histone deacetylase complex	HR	HR lysine demethylase and nuclear receptor corepressor
GO:0042393	histone binding	ASF1A	anti-silencing function 1A histone chaperone
GO:0140713	histone chaperone activity	ASF1A	anti-silencing function 1A histone chaperone
GO:0035064	methylated histone binding	CBX3	chromobox 3
GO:1990226	histone methyltransferase binding	CBX3	chromobox 3
GO:0035035	histone acetyltransferase binding	CEBPB	CCAAT enhancer binding protein beta
GO:0042826	histone deacetylase binding	CEBPB	CCAAT enhancer binding protein beta
GO:0031124	mRNA 3-end processing ENSG00000111605 CPSF6 cleavage and polyadenylation specific factor 6 [Source:HGNC Symbol;Acc:HGNC:13871] GO:0051262 protein tetramerization ENSG00000111605 CPSF6 cleavage and polyadenylation specific factor 6 [Source:HGNC Symbol;Acc:HGNC:13871] GO:0051290 protein heterotetramerization ENSG00000111605 CPSF6 cleavage and polyadenylation specific factor 6 [Source:HGNC Symbol;Ac…	DCP2	decapping mRNA 2
GO:0042393	histone binding	DEK	DEK proto-oncogene
GO:0035066	positive regulation of histone acetylation	DEK	DEK proto-oncogene
GO:0016891	endoribonuclease activity, producing 5-phosphomonoesters ENSG00000100697 DICER1 dicer 1, ribonuclease III [Source:HGNC Symbol;Acc:HGNC:17098] GO:0030422 siRNA processing ENSG00000100697 DICER1 dicer 1, ribonuclease III [Source:HGNC Symbol;Acc:HGNC:17098] GO:0031054 pre-miRNA processing ENSG00000100697 DICER1 dicer 1, ribonuclease III [Source:HGNC Symbol;Acc:HGNC:17098] GO:0010629 negative regulat…	ELAVL4	ELAV like RNA binding protein 4
GO:1905870	positive regulation of 3-UTR-mediated mRNA stabilization ENSG00000162374 ELAVL4 ELAV like RNA binding protein 4 [Source:HGNC Symbol;Acc:HGNC:3315] ENSG00000162374 ELAVL4 ELAV like RNA binding protein 4 [Source:HGNC Symbol;Acc:HGNC:3315] GO:0005515 protein binding ENSG00000162374 ELAVL4 ELAV like RNA binding protein 4 [Source:HGNC Symbol;Acc:HGNC:3315] GO:0003729 mRNA binding ENSG00000162374 ELAVL…	FMR1	fragile X messenger ribonucleoprotein 1
GO:0048027	mRNA 5-UTR binding ENSG00000102081 FMR1 fragile X messenger ribonucleoprotein 1 [Source:HGNC Symbol;Acc:HGNC:3775] GO:0034063 stress granule assembly ENSG00000102081 FMR1 fragile X messenger ribonucleoprotein 1 [Source:HGNC Symbol;Acc:HGNC:3775] GO:0045727 positive regulation of translation ENSG00000102081 FMR1 fragile X messenger ribonucleoprotein 1 [Source:HGNC Symbol;Acc:HGNC:3775] GO:1901386 …	HNRNPA3	heterogeneous nuclear ribonucleoprotein A3
GO:0042393	histone binding	IPO7	importin 7
GO:0000123	histone acetyltransferase complex	JADE3	jade family PHD finger 3
GO:0000123	histone acetyltransferase complex	KANSL1L	KAT8 regulatory NSL complex subunit 1 like
GO:0035035	histone acetyltransferase binding	KANSL1L	KAT8 regulatory NSL complex subunit 1 like
GO:0035267	NuA4 histone acetyltransferase complex	MORF4L2	mortality factor 4 like 2
GO:1901911		RPS7	ribosomal protein S7
GO:0048027		TDP2	tyrosyl-DNA phosphodiesterase 2
GO:0042393	histone binding	TSPYL1	TSPY like 1
GO:0042393	histone binding	TSPYL5	TSPY like 5
GO:0016578	histone deubiquitination	USP16	ubiquitin specific peptidase 16
GO:0042393	histone binding	USP16	ubiquitin specific peptidase 16
GO:0140950	histone H2A deubiquitinase activity	USP16	ubiquitin specific peptidase 16
GO:0031062	positive regulation of histone methylation	XBP1	X-box binding protein 1
