# Supplementary material for: Tau mediates the reshaping of the transcriptional landscape toward intermediate Alzheimer’s disease stages
Source: Front Cell Dev Biol. 2025 Jan 3;12:1459573. doi: 10.3389/fcell.2024.1459573 (PMC11739074; doi:10.3389/fcell.2024.1459573)
Supplement: Supplementary file 11 [file Table5.xlsx]

## Sheet: pink.CTR.nodes
Gene	Kin
PARP9	1
IL18BP	0.937971
PARP14	0.916319
NLRC5	0.905745
GBP1	0.868312
GBP2	0.859358
GBP3	0.852382
CALHM6	0.834476
SAMD9L	0.831209
TAP2	0.815056
XAF1	0.792459
DTX3L	0.769502
DDX58	0.756499
RSAD2	0.74996
IFIT2	0.732962
ZC3HAV1	0.71861
HLA-DOA	0.717123
IFIT3	0.715031
TNFSF13B	0.713173
CMPK2	0.692565
BATF2	0.672545
CTSS	0.670363
SAMD9	0.669645
C1ORF162	0.654153
OAS2	0.636138
GIMAP2	0.628294
DDX60L	0.621035
IRF1	0.619672
ZNFX1	0.619116
SYTL1	0.556181
HCST	0.536226
METTL7B	0.511792
SAMHD1	0.495715
TRIM25	0.491664
SPOCD1	0.482374
RNF213	0.464351
DOK3	0.451496
STAT2	0.44985
TRIM56	0.448037
GBP4	0.435004
C1QC	0.43381
GBP5	0.42726
HELZ2	0.426847
MS4A7	0.423505
HAVCR2	0.42268
LILRB1	0.419114
SP110	0.415461
FGL2	0.402274
MS4A6A	0.388152
GIMAP6	0.386912
PIK3AP1	0.379709
APBB1IP	0.364105
LPAR5	0.357732
PARP10	0.357253
CXCL16	0.332047
C4A	0.329953
MOV10	0.329775
FERMT3	0.329255
CALCOCO2	0.327131
VMP1	0.312771
MAFB	0.312457
PTAFR	0.310844
FYB1	0.307818
PPP1R18	0.299638
AGTRAP	0.298548
VSIR	0.274614
GIMAP8	0.274147
UBALD2	0.270307
RCSD1	0.262608
TMEM119	0.262032
MIR223	0.262013
C5ORF56	0.259162
ADAP2	0.258919
SLFN11	0.249919
S1PR3	0.242383
PAXIP1-AS2	0.242132
CKLF	0.241974
SLC25A19	0.239932
HIST1H4H	0.229113
EFCAB2	0.221379
CCDC167	0.221019
ARHGAP18	0.220551
IL17RA	0.219797
TRIM69	0.216496
IL6R	0.210864
MOB3C	0.210693
ADAMTS2	0.208371
GIMAP7	0.206852
SYK	0.205251
SMIM3	0.203286
ARHGAP27	0.203059
PRAM1	0.202331
GPC6	0.202096
TMIGD3	0.201353
BEST3	0.199187
AKNA	0.196732
S100A16	0.189542
EMB	0.18888
ITGB2-AS1	0.188423
ACSL5	0.186785
METRNL	0.18171
OSMR	0.173933
NRROS	0.169264
SCAMP2	0.16679
CAPS	0.161018
RAB27A	0.156564
ANGPT2	0.155888
PEAR1	0.15584
EHD4	0.153235
KCNE3	0.152317
IKZF1	0.150553
KDELC2	0.145372
FAM181A	0.143261
CP	0.142434
SPCS3	0.132337
PDCD2	0.128019
BCOR	0.126538
MKNK2	0.122481
TNFRSF11A	0.121888
DISP1	0.120961
FXYD5	0.114311
COL27A1	0.112146
ARSD	0.112092
DLGAP1-AS1	0.111361
TMEM132C	0.0827029
SOCS3	0.073955
C11ORF96	0.0690659

## Sheet: pink.proAD.nodes
Gene	Kin
OSMR	1
PPP1R18	0.99749
C1QC	0.966905
CXCL16	0.898201
S1PR3	0.865037
C1ORF162	0.831955
UBALD2	0.760688
PARP9	0.754265
C11ORF96	0.7407
SMIM3	0.7098
METRNL	0.672854
CP	0.669262
IL6R	0.634618
SOCS3	0.624682
MKNK2	0.621356
PIK3AP1	0.613444
DTX3L	0.612357
RAB27A	0.606494
MOB3C	0.590258
GIMAP8	0.577825
MS4A6A	0.561205
GBP3	0.556499
NRROS	0.549163
HCST	0.537581
IL17RA	0.537502
PARP14	0.531951
RCSD1	0.528132
APBB1IP	0.527781
FXYD5	0.519856
TRIM56	0.519828
CTSS	0.506125
ACSL5	0.505034
SCAMP2	0.501706
SYK	0.496699
IL18BP	0.488522
DOK3	0.485504
ZC3HAV1	0.485157
HAVCR2	0.481923
FERMT3	0.475698
VSIR	0.469721
FYB1	0.468391
CKLF	0.467081
SP110	0.458641
SLFN11	0.456364
VMP1	0.448199
FGL2	0.445358
GBP1	0.440211
PRAM1	0.439426
KDELC2	0.426927
TNFSF13B	0.426459
CALHM6	0.425953
S100A16	0.42373
AKNA	0.420268
IKZF1	0.417562
TMEM132C	0.415935
FAM181A	0.41261
MS4A7	0.410433
TMEM119	0.404278
GBP2	0.398672
ARHGAP18	0.395155
PARP10	0.387125
CAPS	0.376676
GIMAP6	0.376444
SAMHD1	0.361631
LILRB1	0.352157
PDCD2	0.351376
NLRC5	0.350527
RNF213	0.326257
STAT2	0.321818
ARHGAP27	0.314965
ZNFX1	0.312598
C4A	0.304357
TMIGD3	0.302857
AGTRAP	0.297447
CCDC167	0.289791
ITGB2-AS1	0.289428
GIMAP7	0.286937
SLC25A19	0.284849
MIR223	0.28075
SAMD9L	0.276363
PTAFR	0.274079
ADAP2	0.271398
CALCOCO2	0.266609
METTL7B	0.252814
PEAR1	0.24322
MOV10	0.242391
GPC6	0.241514
GBP4	0.233772
DDX60L	0.227746
EHD4	0.226338
TRIM25	0.221621
ANGPT2	0.218707
HELZ2	0.218592
MAFB	0.216917
SPOCD1	0.216529
C5ORF56	0.21387
GIMAP2	0.211566
EMB	0.206946
LPAR5	0.206505
HLA-DOA	0.204712
ARSD	0.201367
EFCAB2	0.196735
DISP1	0.19509
XAF1	0.194613
TRIM69	0.19422
IFIT2	0.193137
SAMD9	0.188017
SPCS3	0.187507
KCNE3	0.163801
PAXIP1-AS2	0.158805
IRF1	0.158005
OAS2	0.152841
TAP2	0.151165
IFIT3	0.147804
HIST1H4H	0.140308
DLGAP1-AS1	0.133043
GBP5	0.12926
SYTL1	0.128056
DDX58	0.119054
BCOR	0.117028
COL27A1	0.112752
TNFRSF11A	0.111002
ADAMTS2	0.106279
CMPK2	0.104307
BATF2	0.0967417
BEST3	0.0967149
RSAD2	0.0322116

## Sheet: pink.defAD.nodes
Gene	Kin
PARP9	1
IL18BP	0.937971
PARP14	0.916319
NLRC5	0.905745
GBP1	0.868312
GBP2	0.859358
GBP3	0.852382
CALHM6	0.834476
SAMD9L	0.831209
TAP2	0.815056
XAF1	0.792459
DTX3L	0.769502
DDX58	0.756499
RSAD2	0.74996
IFIT2	0.732962
ZC3HAV1	0.71861
HLA-DOA	0.717123
IFIT3	0.715031
TNFSF13B	0.713173
CMPK2	0.692565
BATF2	0.672545
CTSS	0.670363
SAMD9	0.669645
C1ORF162	0.654153
OAS2	0.636138
GIMAP2	0.628294
DDX60L	0.621035
IRF1	0.619672
ZNFX1	0.619116
SYTL1	0.556181
HCST	0.536226
METTL7B	0.511792
SAMHD1	0.495715
TRIM25	0.491664
SPOCD1	0.482374
RNF213	0.464351
DOK3	0.451496
STAT2	0.44985
TRIM56	0.448037
GBP4	0.435004
C1QC	0.43381
GBP5	0.42726
HELZ2	0.426847
MS4A7	0.423505
HAVCR2	0.42268
LILRB1	0.419114
SP110	0.415461
FGL2	0.402274
MS4A6A	0.388152
GIMAP6	0.386912
PIK3AP1	0.379709
APBB1IP	0.364105
LPAR5	0.357732
PARP10	0.357253
CXCL16	0.332047
C4A	0.329953
MOV10	0.329775
FERMT3	0.329255
CALCOCO2	0.327131
VMP1	0.312771
MAFB	0.312457
PTAFR	0.310844
FYB1	0.307818
PPP1R18	0.299638
AGTRAP	0.298548
VSIR	0.274614
GIMAP8	0.274147
UBALD2	0.270307
RCSD1	0.262608
TMEM119	0.262032
MIR223	0.262013
C5ORF56	0.259162
ADAP2	0.258919
SLFN11	0.249919
S1PR3	0.242383
PAXIP1-AS2	0.242132
CKLF	0.241974
SLC25A19	0.239932
HIST1H4H	0.229113
EFCAB2	0.221379
CCDC167	0.221019
ARHGAP18	0.220551
IL17RA	0.219797
TRIM69	0.216496
IL6R	0.210864
MOB3C	0.210693
ADAMTS2	0.208371
GIMAP7	0.206852
SYK	0.205251
SMIM3	0.203286
ARHGAP27	0.203059
PRAM1	0.202331
GPC6	0.202096
TMIGD3	0.201353
BEST3	0.199187
AKNA	0.196732
S100A16	0.189542
EMB	0.18888
ITGB2-AS1	0.188423
ACSL5	0.186785
METRNL	0.18171
OSMR	0.173933
NRROS	0.169264
SCAMP2	0.16679
CAPS	0.161018
RAB27A	0.156564
ANGPT2	0.155888
PEAR1	0.15584
EHD4	0.153235
KCNE3	0.152317
IKZF1	0.150553
KDELC2	0.145372
FAM181A	0.143261
CP	0.142434
SPCS3	0.132337
PDCD2	0.128019
BCOR	0.126538
MKNK2	0.122481
TNFRSF11A	0.121888
DISP1	0.120961
FXYD5	0.114311
COL27A1	0.112146
ARSD	0.112092
DLGAP1-AS1	0.111361
TMEM132C	0.0827029
SOCS3	0.073955
C11ORF96	0.0690659

## Sheet: pink.CTR.edges
Gene1	Gene2	TO
PARP9	RSAD2	0.503962
RSAD2	PARP9	0.503962
PARP9	TAP2	0.481587
TAP2	PARP9	0.481587
CMPK2	PARP9	0.479542
PARP9	CMPK2	0.479542
IL18BP	RSAD2	0.475808
RSAD2	IL18BP	0.475808
GBP2	PARP9	0.475781
PARP9	GBP2	0.475781
IRF1	PARP9	0.475744
PARP9	IRF1	0.475744
NLRC5	RSAD2	0.474744
RSAD2	NLRC5	0.474744
IFIT3	PARP9	0.469995
PARP9	IFIT3	0.469995
NLRC5	PARP9	0.467386
PARP9	NLRC5	0.467386
DDX58	PARP9	0.465256
PARP9	DDX58	0.465256
GBP1	PARP9	0.46453
PARP9	GBP1	0.46453
PARP9	SAMD9L	0.463168
SAMD9L	PARP9	0.463168
PARP14	RSAD2	0.46222
RSAD2	PARP14	0.46222
IL18BP	PARP9	0.461444
PARP9	IL18BP	0.461444
PARP14	PARP9	0.457492
PARP9	PARP14	0.457492
GBP2	RSAD2	0.456234
RSAD2	GBP2	0.456234
IL18BP	TAP2	0.454681
TAP2	IL18BP	0.454681
GBP3	PARP9	0.454662
PARP9	GBP3	0.454662
IFIT2	PARP9	0.454579
PARP9	IFIT2	0.454579
CMPK2	NLRC5	0.454534
NLRC5	CMPK2	0.454534
BATF2	PARP9	0.452855
PARP9	BATF2	0.452855
IFIT3	NLRC5	0.452136
NLRC5	IFIT3	0.452136
IL18BP	IRF1	0.450711
IRF1	IL18BP	0.450711
CALHM6	PARP9	0.450658
PARP9	CALHM6	0.450658
CMPK2	IL18BP	0.450551
IL18BP	CMPK2	0.450551
GBP2	IL18BP	0.449971
IL18BP	GBP2	0.449971
GBP1	RSAD2	0.449649
RSAD2	GBP1	0.449649
PARP9	SAMD9	0.44923
SAMD9	PARP9	0.44923
NLRC5	TAP2	0.445501
TAP2	NLRC5	0.445501
IRF1	NLRC5	0.444869
NLRC5	IRF1	0.444869
GBP2	NLRC5	0.444803
NLRC5	GBP2	0.444803
PARP9	SYTL1	0.44295
SYTL1	PARP9	0.44295
IL18BP	NLRC5	0.442583
NLRC5	IL18BP	0.442583
DDX60L	PARP9	0.442439
PARP9	DDX60L	0.442439
IFIT3	IL18BP	0.442204
IL18BP	IFIT3	0.442204
PARP14	TAP2	0.441745
TAP2	PARP14	0.441745
CMPK2	PARP14	0.441068
PARP14	CMPK2	0.441068
DDX58	IL18BP	0.440692
IL18BP	DDX58	0.440692
GBP1	NLRC5	0.440034
NLRC5	GBP1	0.440034
GBP1	IL18BP	0.439458
IL18BP	GBP1	0.439458
IL18BP	SAMD9L	0.438653
SAMD9L	IL18BP	0.438653
GBP3	NLRC5	0.437752
NLRC5	GBP3	0.437752
GBP2	IRF1	0.437406
IRF1	GBP2	0.437406
PARP9	XAF1	0.437283
XAF1	PARP9	0.437283
RSAD2	TAP2	0.436251
TAP2	RSAD2	0.436251
GBP2	PARP14	0.435018
PARP14	GBP2	0.435018
DDX58	NLRC5	0.434585
NLRC5	DDX58	0.434585
GBP3	RSAD2	0.434398
RSAD2	GBP3	0.434398
IFIT2	NLRC5	0.433812
NLRC5	IFIT2	0.433812
IFIT3	PARP14	0.433749
PARP14	IFIT3	0.433749
PARP9	ZC3HAV1	0.432923
ZC3HAV1	PARP9	0.432923
IRF1	PARP14	0.432568
PARP14	IRF1	0.432568
IL18BP	PARP14	0.432071
PARP14	IL18BP	0.432071
GBP2	TAP2	0.431206
TAP2	GBP2	0.431206
CALHM6	NLRC5	0.431035
NLRC5	CALHM6	0.431035
CMPK2	GBP2	0.430762
GBP2	CMPK2	0.430762
PARP9	SPOCD1	0.430625
SPOCD1	PARP9	0.430625
CMPK2	GBP1	0.430554
GBP1	CMPK2	0.430554
BATF2	IL18BP	0.430298
IL18BP	BATF2	0.430298
NLRC5	SAMD9	0.42978
SAMD9	NLRC5	0.42978
GBP3	IL18BP	0.429318
IL18BP	GBP3	0.429318
NLRC5	PARP14	0.428382
PARP14	NLRC5	0.428382
GBP1	IFIT3	0.427842
IFIT3	GBP1	0.427842
IFIT2	IL18BP	0.427459
IL18BP	IFIT2	0.427459
CALHM6	IL18BP	0.427286
IL18BP	CALHM6	0.427286
GBP1	PARP14	0.426111
PARP14	GBP1	0.426111
IL18BP	SAMD9	0.425927
SAMD9	IL18BP	0.425927
GBP3	IFIT3	0.425136
IFIT3	GBP3	0.425136
DDX58	PARP14	0.425133
PARP14	DDX58	0.425133
GBP1	TAP2	0.424795
TAP2	GBP1	0.424795
GBP5	PARP9	0.42414
PARP9	GBP5	0.42414
CMPK2	GBP3	0.423788
GBP3	CMPK2	0.423788
NLRC5	SAMD9L	0.423026
SAMD9L	NLRC5	0.423026
PARP14	SAMD9L	0.423007
SAMD9L	PARP14	0.423007
GBP1	GBP2	0.422986
GBP2	GBP1	0.422986
GBP1	IRF1	0.422469
IRF1	GBP1	0.422469
RSAD2	SAMD9L	0.422325
SAMD9L	RSAD2	0.422325
BATF2	NLRC5	0.421315
NLRC5	BATF2	0.421315
GBP2	IFIT3	0.420753
IFIT3	GBP2	0.420753
IFIT2	PARP14	0.420642
PARP14	IFIT2	0.420642
OAS2	PARP9	0.420634
PARP9	OAS2	0.420634
DDX58	GBP2	0.42037
GBP2	DDX58	0.42037
DDX60L	NLRC5	0.420358
NLRC5	DDX60L	0.420358
DDX60L	IL18BP	0.419618
IL18BP	DDX60L	0.419618
IL18BP	SYTL1	0.41872
SYTL1	IL18BP	0.41872
CMPK2	TAP2	0.418455
TAP2	CMPK2	0.418455
CALHM6	RSAD2	0.418426
RSAD2	CALHM6	0.418426
GBP3	PARP14	0.418341
PARP14	GBP3	0.418341
PARP9	ZNFX1	0.417354
ZNFX1	PARP9	0.417354
METTL7B	PARP9	0.416588
PARP9	METTL7B	0.416588
GBP2	SAMD9L	0.41544
SAMD9L	GBP2	0.41544
NLRC5	XAF1	0.41422
XAF1	NLRC5	0.41422
GBP1	GBP3	0.413825
GBP3	GBP1	0.413825
BATF2	PARP14	0.413338
PARP14	BATF2	0.413338
IL18BP	XAF1	0.412791
XAF1	IL18BP	0.412791
CALHM6	PARP14	0.412566
PARP14	CALHM6	0.412566
GBP1	IFIT2	0.411412
IFIT2	GBP1	0.411412
DDX58	GBP1	0.41072
GBP1	DDX58	0.41072
IL18BP	ZC3HAV1	0.410275
ZC3HAV1	IL18BP	0.410275
PARP14	SAMD9	0.410049
SAMD9	PARP14	0.410049
DTX3L	PARP9	0.409734
PARP9	DTX3L	0.409734
GBP2	SAMD9	0.409416
SAMD9	GBP2	0.409416
GBP3	TAP2	0.408999
TAP2	GBP3	0.408999
NLRC5	SYTL1	0.408555
SYTL1	NLRC5	0.408555
GBP2	GBP3	0.408284
GBP3	GBP2	0.408284
IFIT3	TAP2	0.408077
TAP2	IFIT3	0.408077
NLRC5	SPOCD1	0.40803
SPOCD1	NLRC5	0.40803
IL18BP	SPOCD1	0.407929
SPOCD1	IL18BP	0.407929
IRF1	TAP2	0.407888
TAP2	IRF1	0.407888
BATF2	GBP2	0.407674
GBP2	BATF2	0.407674
CALHM6	GBP1	0.407619
GBP1	CALHM6	0.407619
HLA-DOA	PARP9	0.407341
PARP9	HLA-DOA	0.407341
GBP3	IFIT2	0.407227
IFIT2	GBP3	0.407227
GBP2	IFIT2	0.407212
IFIT2	GBP2	0.407212
IRF1	SAMD9L	0.406818
SAMD9L	IRF1	0.406818
CMPK2	RSAD2	0.406335
RSAD2	CMPK2	0.406335
CALHM6	GBP2	0.405586
GBP2	CALHM6	0.405586
DDX60L	PARP14	0.405072
PARP14	DDX60L	0.405072
GBP1	SAMD9L	0.404974
SAMD9L	GBP1	0.404974
GBP1	SAMD9	0.404662
SAMD9	GBP1	0.404662
SAMD9L	TAP2	0.404577
TAP2	SAMD9L	0.404577
PARP14	SYTL1	0.403169
SYTL1	PARP14	0.403169
CALHM6	CMPK2	0.402793
CMPK2	CALHM6	0.402793
PARP14	XAF1	0.402625
XAF1	PARP14	0.402625
PARP9	TRIM25	0.402279
TRIM25	PARP9	0.402279
DDX58	TAP2	0.401921
TAP2	DDX58	0.401921
CALHM6	IFIT3	0.401871
IFIT3	CALHM6	0.401871
IL18BP	OAS2	0.401659
OAS2	IL18BP	0.401659
GIMAP2	PARP9	0.4015
PARP9	GIMAP2	0.4015
GBP3	IRF1	0.40053
IRF1	GBP3	0.40053
IRF1	RSAD2	0.400495
RSAD2	IRF1	0.400495
CALHM6	GBP3	0.399116
GBP3	CALHM6	0.399116
IFIT3	RSAD2	0.398758
RSAD2	IFIT3	0.398758
DDX60L	GBP2	0.398274
GBP2	DDX60L	0.398274
BATF2	GBP1	0.397636
GBP1	BATF2	0.397636
GBP5	IL18BP	0.397408
IL18BP	GBP5	0.397408
PARP9	TNFSF13B	0.396502
TNFSF13B	PARP9	0.396502
CMPK2	SAMD9L	0.396432
SAMD9L	CMPK2	0.396432
NLRC5	OAS2	0.395798
OAS2	NLRC5	0.395798
PARP14	ZC3HAV1	0.395691
ZC3HAV1	PARP14	0.395691
GBP2	SYTL1	0.395283
SYTL1	GBP2	0.395283
IL18BP	METTL7B	0.395257
METTL7B	IL18BP	0.395257
CALHM6	TAP2	0.395146
TAP2	CALHM6	0.395146
DDX58	GBP3	0.395024
GBP3	DDX58	0.395024
GBP2	SPOCD1	0.394505
SPOCD1	GBP2	0.394505
IFIT2	TAP2	0.39432
TAP2	IFIT2	0.39432
GBP1	XAF1	0.393574
XAF1	GBP1	0.393574
CALHM6	IRF1	0.393406
IRF1	CALHM6	0.393406
DDX60L	GBP1	0.392942
GBP1	DDX60L	0.392942
METTL7B	NLRC5	0.392647
NLRC5	METTL7B	0.392647
PARP14	SPOCD1	0.392401
SPOCD1	PARP14	0.392401
GBP3	SAMD9	0.392304
SAMD9	GBP3	0.392304
IL18BP	ZNFX1	0.392008
ZNFX1	IL18BP	0.392008
DDX58	SAMD9L	0.391551
SAMD9L	DDX58	0.391551
DDX58	RSAD2	0.3915
RSAD2	DDX58	0.3915
GBP4	PARP9	0.389789
PARP9	GBP4	0.389789
DTX3L	NLRC5	0.389783
NLRC5	DTX3L	0.389783
GBP5	PARP14	0.388599
PARP14	GBP5	0.388599
HLA-DOA	IL18BP	0.388406
IL18BP	HLA-DOA	0.388406
DTX3L	IL18BP	0.388369
IL18BP	DTX3L	0.388369
GBP2	XAF1	0.388256
XAF1	GBP2	0.388256
GBP3	XAF1	0.387804
XAF1	GBP3	0.387804
NLRC5	ZC3HAV1	0.387184
ZC3HAV1	NLRC5	0.387184
GBP1	SPOCD1	0.387037
SPOCD1	GBP1	0.387037
GBP2	GBP5	0.386241
GBP5	GBP2	0.386241
IFIT3	SAMD9L	0.385762
SAMD9L	IFIT3	0.385762
PARP14	ZNFX1	0.385591
ZNFX1	PARP14	0.385591
SAMD9	TAP2	0.385521
TAP2	SAMD9	0.385521
CALHM6	DDX58	0.385231
DDX58	CALHM6	0.385231
CALHM6	IFIT2	0.385227
IFIT2	CALHM6	0.385227
NLRC5	ZNFX1	0.384989
ZNFX1	NLRC5	0.384989
BATF2	TAP2	0.384262
TAP2	BATF2	0.384262
OAS2	PARP14	0.38404
PARP14	OAS2	0.38404
GBP3	SAMD9L	0.3838
SAMD9L	GBP3	0.3838
GBP1	SYTL1	0.383558
SYTL1	GBP1	0.383558
BATF2	SAMD9L	0.383527
SAMD9L	BATF2	0.383527
DDX60L	GBP3	0.383054
GBP3	DDX60L	0.383054
RSAD2	XAF1	0.382457
XAF1	RSAD2	0.382457
MOV10	PARP9	0.382375
PARP9	MOV10	0.382375
CALHM6	SAMD9	0.38231
SAMD9	CALHM6	0.38231
METTL7B	PARP14	0.381725
PARP14	METTL7B	0.381725
IFIT2	RSAD2	0.381617
RSAD2	IFIT2	0.381617
GIMAP2	IL18BP	0.380099
IL18BP	GIMAP2	0.380099
GBP2	ZC3HAV1	0.380019
ZC3HAV1	GBP2	0.380019
DDX60L	TAP2	0.380016
TAP2	DDX60L	0.380016
BATF2	GBP3	0.379532
GBP3	BATF2	0.379532
GBP5	NLRC5	0.379175
NLRC5	GBP5	0.379175
IL18BP	TRIM25	0.378379
TRIM25	IL18BP	0.378379
GBP2	OAS2	0.377955
OAS2	GBP2	0.377955
BATF2	RSAD2	0.377513
RSAD2	BATF2	0.377513
SYTL1	TAP2	0.377102
TAP2	SYTL1	0.377102
SAMD9	SAMD9L	0.376963
SAMD9L	SAMD9	0.376963
IL18BP	TNFSF13B	0.376881
TNFSF13B	IL18BP	0.376881
RSAD2	SAMD9	0.376767
SAMD9	RSAD2	0.376767
CALHM6	SAMD9L	0.375989
SAMD9L	CALHM6	0.375989
TAP2	XAF1	0.375987
XAF1	TAP2	0.375987
HLA-DOA	NLRC5	0.375582
NLRC5	HLA-DOA	0.375582
DTX3L	PARP14	0.375533
PARP14	DTX3L	0.375533
SAMD9L	SYTL1	0.375297
SYTL1	SAMD9L	0.375297
CMPK2	IFIT3	0.374976
IFIT3	CMPK2	0.374976
IFIT3	XAF1	0.374786
XAF1	IFIT3	0.374786
PARP9	STAT2	0.374643
STAT2	PARP9	0.374643
CMPK2	XAF1	0.374143
XAF1	CMPK2	0.374143
IFIT2	SAMD9L	0.37355
SAMD9L	IFIT2	0.37355
CALHM6	DDX60L	0.372439
DDX60L	CALHM6	0.372439
BATF2	CALHM6	0.372386
CALHM6	BATF2	0.372386
DDX58	IRF1	0.372212
IRF1	DDX58	0.372212
CMPK2	DDX58	0.372211
DDX58	CMPK2	0.372211
GBP1	OAS2	0.372207
OAS2	GBP1	0.372207
GBP1	ZC3HAV1	0.371823
ZC3HAV1	GBP1	0.371823
CALHM6	XAF1	0.371406
XAF1	CALHM6	0.371406
DDX60L	RSAD2	0.371307
RSAD2	DDX60L	0.371307
GBP2	METTL7B	0.371165
METTL7B	GBP2	0.371165
TAP2	ZC3HAV1	0.370723
ZC3HAV1	TAP2	0.370723
HLA-DOA	PARP14	0.370573
PARP14	HLA-DOA	0.370573
DTX3L	GBP1	0.370045
GBP1	DTX3L	0.370045
SAMD9L	ZC3HAV1	0.369974
ZC3HAV1	SAMD9L	0.369974
HIST1H4H	PARP9	0.369905
PARP9	HIST1H4H	0.369905
CMPK2	IFIT2	0.369231
IFIT2	CMPK2	0.369231
GBP4	IL18BP	0.369013
IL18BP	GBP4	0.369013
RSAD2	SYTL1	0.368599
SYTL1	RSAD2	0.368599
DDX60L	SAMD9L	0.368488
SAMD9L	DDX60L	0.368488
GBP1	GBP5	0.368047
GBP5	GBP1	0.368047
IFIT2	IFIT3	0.367896
IFIT3	IFIT2	0.367896
GBP3	SPOCD1	0.367851
SPOCD1	GBP3	0.367851
GBP2	ZNFX1	0.36781
ZNFX1	GBP2	0.36781
GBP3	SYTL1	0.366853
SYTL1	GBP3	0.366853
GBP1	ZNFX1	0.365882
ZNFX1	GBP1	0.365882
DTX3L	GBP3	0.365857
GBP3	DTX3L	0.365857
PARP14	TRIM25	0.365831
TRIM25	PARP14	0.365831
SAMD9L	SPOCD1	0.365581
SPOCD1	SAMD9L	0.365581
GBP5	SAMD9L	0.365367
SAMD9L	GBP5	0.365367
GIMAP2	PARP14	0.364855
PARP14	GIMAP2	0.364855
HELZ2	PARP9	0.364713
PARP9	HELZ2	0.364713
GBP1	METTL7B	0.364083
METTL7B	GBP1	0.364083
GBP2	HLA-DOA	0.363159
HLA-DOA	GBP2	0.363159
NLRC5	STAT2	0.362537
STAT2	NLRC5	0.362537
DTX3L	GBP2	0.362514
GBP2	DTX3L	0.362514
DDX58	IFIT3	0.362423
IFIT3	DDX58	0.362423
GIMAP2	NLRC5	0.361877
NLRC5	GIMAP2	0.361877
SPOCD1	TAP2	0.361639
TAP2	SPOCD1	0.361639
PARP14	TNFSF13B	0.361328
TNFSF13B	PARP14	0.361328
CALHM6	SYTL1	0.361215
SYTL1	CALHM6	0.361215
SAMD9L	XAF1	0.361043
XAF1	SAMD9L	0.361043
IFIT2	XAF1	0.360753
XAF1	IFIT2	0.360753
IL18BP	MOV10	0.359592
MOV10	IL18BP	0.359592
NLRC5	TNFSF13B	0.359093
TNFSF13B	NLRC5	0.359093
GBP5	TAP2	0.359023
TAP2	GBP5	0.359023
GBP3	ZNFX1	0.358709
ZNFX1	GBP3	0.358709
TAP2	ZNFX1	0.358366
ZNFX1	TAP2	0.358366
RSAD2	SPOCD1	0.358268
SPOCD1	RSAD2	0.358268
CALHM6	SPOCD1	0.358079
SPOCD1	CALHM6	0.358079
GBP1	HLA-DOA	0.357052
HLA-DOA	GBP1	0.357052
GBP3	OAS2	0.357002
OAS2	GBP3	0.357002
GBP2	TRIM25	0.356936
TRIM25	GBP2	0.356936
DDX58	SAMD9	0.356739
SAMD9	DDX58	0.356739
GBP4	NLRC5	0.35642
NLRC5	GBP4	0.35642
OAS2	SAMD9L	0.356378
SAMD9L	OAS2	0.356378
GBP3	METTL7B	0.356324
METTL7B	GBP3	0.356324
HIST1H4H	IL18BP	0.356033
IL18BP	HIST1H4H	0.356033
GBP2	GIMAP2	0.355872
GIMAP2	GBP2	0.355872
NLRC5	TRIM25	0.355813
TRIM25	NLRC5	0.355813
METTL7B	TAP2	0.355541
TAP2	METTL7B	0.355541
CALHM6	DTX3L	0.354714
DTX3L	CALHM6	0.354714
OAS2	TAP2	0.354427
TAP2	OAS2	0.354427
PARP9	TRIM56	0.354418
TRIM56	PARP9	0.354418
GBP4	PARP14	0.354138
PARP14	GBP4	0.354138
DDX58	XAF1	0.3534
XAF1	DDX58	0.3534
HIST1H4H	NLRC5	0.353295
NLRC5	HIST1H4H	0.353295
DDX58	IFIT2	0.353039
IFIT2	DDX58	0.353039
GBP3	ZC3HAV1	0.352574
ZC3HAV1	GBP3	0.352574
DDX58	DDX60L	0.352203
DDX60L	DDX58	0.352203
IRF1	XAF1	0.351777
XAF1	IRF1	0.351777
CALHM6	OAS2	0.351501
OAS2	CALHM6	0.351501
PARP9	RNF213	0.351299
RNF213	PARP9	0.351299
DTX3L	TAP2	0.350236
TAP2	DTX3L	0.350236
PARP14	STAT2	0.349775
STAT2	PARP14	0.349775
MOV10	PARP14	0.349644
PARP14	MOV10	0.349644
BATF2	DDX58	0.349524
DDX58	BATF2	0.349524
GBP2	TNFSF13B	0.349426
TNFSF13B	GBP2	0.349426
OAS2	RSAD2	0.348801
RSAD2	OAS2	0.348801
RSAD2	ZC3HAV1	0.348769
ZC3HAV1	RSAD2	0.348769
IL18BP	STAT2	0.348548
STAT2	IL18BP	0.348548
SAMD9L	TRIM25	0.347623
TRIM25	SAMD9L	0.347623
SAMD9	XAF1	0.34752
XAF1	SAMD9	0.34752
GBP3	STAT2	0.34727
STAT2	GBP3	0.34727
METTL7B	RSAD2	0.346851
RSAD2	METTL7B	0.346851
SAMD9L	ZNFX1	0.346836
ZNFX1	SAMD9L	0.346836
HLA-DOA	SAMD9L	0.346681
SAMD9L	HLA-DOA	0.346681
GBP5	RSAD2	0.346288
RSAD2	GBP5	0.346288
GBP1	GIMAP2	0.346117
GIMAP2	GBP1	0.346117
CALHM6	ZC3HAV1	0.346079
ZC3HAV1	CALHM6	0.346079
HELZ2	IL18BP	0.345861
IL18BP	HELZ2	0.345861
IFIT3	IRF1	0.34581
IRF1	IFIT3	0.34581
METTL7B	SAMD9L	0.345577
SAMD9L	METTL7B	0.345577
CMPK2	IRF1	0.345198
IRF1	CMPK2	0.345198
GBP1	TNFSF13B	0.344999
TNFSF13B	GBP1	0.344999
GBP2	HIST1H4H	0.344569
HIST1H4H	GBP2	0.344569
HLA-DOA	TAP2	0.344543
TAP2	HLA-DOA	0.344543
ADAMTS2	PARP9	0.344396
PARP9	ADAMTS2	0.344396
GIMAP2	SAMD9L	0.344386
SAMD9L	GIMAP2	0.344386
CALHM6	METTL7B	0.344254
METTL7B	CALHM6	0.344254
GBP1	TRIM25	0.344236
TRIM25	GBP1	0.344236
DTX3L	RSAD2	0.343992
RSAD2	DTX3L	0.343992
DDX58	SYTL1	0.343926
SYTL1	DDX58	0.343926
GBP2	GBP4	0.34374
GBP4	GBP2	0.34374
GBP3	GBP5	0.343385
GBP5	GBP3	0.343385
PARP9	TRIM69	0.34296
TRIM69	PARP9	0.34296
RSAD2	ZNFX1	0.342271
ZNFX1	RSAD2	0.342271
CALHM6	ZNFX1	0.342
ZNFX1	CALHM6	0.342
IFIT2	IRF1	0.341923
IRF1	IFIT2	0.341923
MOV10	NLRC5	0.341804
NLRC5	MOV10	0.341804
DDX60L	XAF1	0.341327
XAF1	DDX60L	0.341327
GBP3	HLA-DOA	0.34106
HLA-DOA	GBP3	0.34106
DTX3L	IFIT3	0.339995
IFIT3	DTX3L	0.339995
GBP1	STAT2	0.339989
STAT2	GBP1	0.339989
GIMAP2	TAP2	0.339632
TAP2	GIMAP2	0.339632
HELZ2	NLRC5	0.339261
NLRC5	HELZ2	0.339261
CALHM6	HLA-DOA	0.339164
HLA-DOA	CALHM6	0.339164
TAP2	TRIM25	0.338465
TRIM25	TAP2	0.338465
CMPK2	DTX3L	0.338364
DTX3L	CMPK2	0.338364
IFIT3	SAMD9	0.338011
SAMD9	IFIT3	0.338011
SAMD9L	TNFSF13B	0.337529
TNFSF13B	SAMD9L	0.337529
GBP1	GBP4	0.337333
GBP4	GBP1	0.337333
DTX3L	SAMD9L	0.337156
SAMD9L	DTX3L	0.337156
PARP9	SAMHD1	0.337103
SAMHD1	PARP9	0.337103
TAP2	TNFSF13B	0.336494
TNFSF13B	TAP2	0.336494
BATF2	XAF1	0.336033
XAF1	BATF2	0.336033
CALHM6	GBP5	0.335687
GBP5	CALHM6	0.335687
GBP2	MOV10	0.335494
MOV10	GBP2	0.335494
IFIT2	SAMD9	0.334951
SAMD9	IFIT2	0.334951
GBP2	STAT2	0.334258
STAT2	GBP2	0.334258
HIST1H4H	PARP14	0.333415
PARP14	HIST1H4H	0.333415
PARP14	TRIM56	0.332367
TRIM56	PARP14	0.332367
DDX58	ZC3HAV1	0.33236
ZC3HAV1	DDX58	0.33236
CMPK2	SAMD9	0.332287
SAMD9	CMPK2	0.332287
HELZ2	PARP14	0.331549
PARP14	HELZ2	0.331549
GBP4	SAMD9L	0.331178
SAMD9L	GBP4	0.331178
DDX60L	IFIT3	0.330835
IFIT3	DDX60L	0.330835
IL18BP	TRIM56	0.330528
TRIM56	IL18BP	0.330528
GBP1	HIST1H4H	0.330369
HIST1H4H	GBP1	0.330369
DDX58	SPOCD1	0.330112
SPOCD1	DDX58	0.330112

## Sheet: pink.proAD.edges
Gene1	Gene2	TO
OSMR	SOCS3	0.213653
SOCS3	OSMR	0.213653
C11ORF96	SOCS3	0.203457
SOCS3	C11ORF96	0.203457
C11ORF96	OSMR	0.202105
OSMR	C11ORF96	0.202105
PPP1R18	SOCS3	0.190891
SOCS3	PPP1R18	0.190891
OSMR	SMIM3	0.189573
SMIM3	OSMR	0.189573
C11ORF96	PPP1R18	0.183222
PPP1R18	C11ORF96	0.183222
C11ORF96	S1PR3	0.177986
S1PR3	C11ORF96	0.177986
C11ORF96	SMIM3	0.175948
SMIM3	C11ORF96	0.175948
OSMR	RAB27A	0.175777
RAB27A	OSMR	0.175777
SMIM3	SOCS3	0.173331
SOCS3	SMIM3	0.173331
OSMR	UBALD2	0.172002
UBALD2	OSMR	0.172002
CP	SOCS3	0.170101
SOCS3	CP	0.170101
CP	OSMR	0.169809
OSMR	CP	0.169809
OSMR	S1PR3	0.168489
S1PR3	OSMR	0.168489
PPP1R18	RAB27A	0.167507
RAB27A	PPP1R18	0.167507
C1QC	MS4A6A	0.167298
MS4A6A	C1QC	0.167298
C11ORF96	CP	0.167213
CP	C11ORF96	0.167213
OSMR	PPP1R18	0.166503
PPP1R18	OSMR	0.166503
CP	PPP1R18	0.165908
PPP1R18	CP	0.165908
IL6R	PPP1R18	0.165145
PPP1R18	IL6R	0.165145
PPP1R18	S1PR3	0.16506
S1PR3	PPP1R18	0.16506
IL6R	OSMR	0.164055
OSMR	IL6R	0.164055
S1PR3	SOCS3	0.162144
SOCS3	S1PR3	0.162144
PPP1R18	SMIM3	0.160929
SMIM3	PPP1R18	0.160929
PPP1R18	UBALD2	0.160645
UBALD2	PPP1R18	0.160645
ACSL5	OSMR	0.159733
OSMR	ACSL5	0.159733
S1PR3	SMIM3	0.159597
SMIM3	S1PR3	0.159597
ACSL5	PPP1R18	0.15959
PPP1R18	ACSL5	0.15959
C1ORF162	PPP1R18	0.159392
PPP1R18	C1ORF162	0.159392
C1ORF162	OSMR	0.156264
OSMR	C1ORF162	0.156264
C11ORF96	RAB27A	0.154927
RAB27A	C11ORF96	0.154927
PPP1R18	VMP1	0.151399
VMP1	PPP1R18	0.151399
SOCS3	UBALD2	0.151381
UBALD2	SOCS3	0.151381
C11ORF96	IL6R	0.150629
IL6R	C11ORF96	0.150629
C1QC	PPP1R18	0.147366
PPP1R18	C1QC	0.147366
METRNL	OSMR	0.146587
OSMR	METRNL	0.146587
RAB27A	SOCS3	0.144665
SOCS3	RAB27A	0.144665
PIK3AP1	PPP1R18	0.144388
PPP1R18	PIK3AP1	0.144388
RAB27A	S1PR3	0.143909
S1PR3	RAB27A	0.143909
IL6R	SOCS3	0.143597
SOCS3	IL6R	0.143597
C1QC	VMP1	0.14209
VMP1	C1QC	0.14209
C1ORF162	SOCS3	0.142061
SOCS3	C1ORF162	0.142061
METRNL	PPP1R18	0.141775
PPP1R18	METRNL	0.141775
ACSL5	C1ORF162	0.141368
C1ORF162	ACSL5	0.141368
CP	S1PR3	0.140675
S1PR3	CP	0.140675
CP	RAB27A	0.140663
RAB27A	CP	0.140663
AKNA	PPP1R18	0.140586
PPP1R18	AKNA	0.140586
C1QC	PIK3AP1	0.140344
PIK3AP1	C1QC	0.140344
CP	SMIM3	0.138459
SMIM3	CP	0.138459
C1ORF162	S1PR3	0.138304
S1PR3	C1ORF162	0.138304
CP	IL6R	0.137945
IL6R	CP	0.137945
IL6R	S1PR3	0.137773
S1PR3	IL6R	0.137773
C1ORF162	SMIM3	0.137168
SMIM3	C1ORF162	0.137168
C11ORF96	C1ORF162	0.136522
C1ORF162	C11ORF96	0.136522
RAB27A	SMIM3	0.135307
SMIM3	RAB27A	0.135307
PIK3AP1	S1PR3	0.134956
S1PR3	PIK3AP1	0.134956
SMIM3	UBALD2	0.134703
UBALD2	SMIM3	0.134703
DTX3L	PPP1R18	0.134065
PPP1R18	DTX3L	0.134065
APBB1IP	C1QC	0.133794
C1QC	APBB1IP	0.133794
IL6R	SMIM3	0.133488
SMIM3	IL6R	0.133488
C11ORF96	UBALD2	0.132744
UBALD2	C11ORF96	0.132744
OSMR	PIK3AP1	0.131081
PIK3AP1	OSMR	0.131081
RAB27A	UBALD2	0.131029
UBALD2	RAB27A	0.131029
METRNL	UBALD2	0.130989
UBALD2	METRNL	0.130989
ACSL5	S1PR3	0.130316
S1PR3	ACSL5	0.130316
DTX3L	OSMR	0.130267
OSMR	DTX3L	0.130267
C1QC	TNFSF13B	0.129816
TNFSF13B	C1QC	0.129816
C1ORF162	C1QC	0.129581
C1QC	C1ORF162	0.129581
C1QC	FYB1	0.128197
FYB1	C1QC	0.128197
C11ORF96	DTX3L	0.127299
DTX3L	C11ORF96	0.127299
C1ORF162	IL6R	0.125875
IL6R	C1ORF162	0.125875
S1PR3	UBALD2	0.125513
UBALD2	S1PR3	0.125513
CP	VMP1	0.125211
VMP1	CP	0.125211
FYB1	PPP1R18	0.124737
PPP1R18	FYB1	0.124737
C11ORF96	PIK3AP1	0.124034
PIK3AP1	C11ORF96	0.124034
C1QC	PARP9	0.123899
PARP9	C1QC	0.123899
DTX3L	S1PR3	0.122823
S1PR3	DTX3L	0.122823
C1QC	S1PR3	0.122781
S1PR3	C1QC	0.122781
CXCL16	PPP1R18	0.122496
PPP1R18	CXCL16	0.122496
PARP9	PPP1R18	0.122356
PPP1R18	PARP9	0.122356
C1ORF162	UBALD2	0.122213
UBALD2	C1ORF162	0.122213
AKNA	OSMR	0.121924
OSMR	AKNA	0.121924
C11ORF96	C1QC	0.121526
C1QC	C11ORF96	0.121526
C1QC	HCST	0.119216
HCST	C1QC	0.119216
OSMR	VMP1	0.118463
VMP1	OSMR	0.118463
ACSL5	C1QC	0.118172
C1QC	ACSL5	0.118172
CALHM6	PPP1R18	0.118126
PPP1R18	CALHM6	0.118126
ACSL5	C11ORF96	0.118063
C11ORF96	ACSL5	0.118063
C1QC	CTSS	0.11798
CTSS	C1QC	0.11798
PPP1R18	TNFSF13B	0.117927
TNFSF13B	PPP1R18	0.117927
IL6R	UBALD2	0.117416
UBALD2	IL6R	0.117416
C1ORF162	RAB27A	0.116983
RAB27A	C1ORF162	0.116983
C1QC	CXCL16	0.116898
CXCL16	C1QC	0.116898
ACSL5	UBALD2	0.116716
UBALD2	ACSL5	0.116716
C11ORF96	VMP1	0.116676
VMP1	C11ORF96	0.116676
C1QC	CP	0.116386
CP	C1QC	0.116386
METRNL	S1PR3	0.116325
S1PR3	METRNL	0.116325
CXCL16	PIK3AP1	0.11629
PIK3AP1	CXCL16	0.11629
CP	FYB1	0.116112
FYB1	CP	0.116112
C1QC	SOCS3	0.115861
SOCS3	C1QC	0.115861
MS4A6A	PPP1R18	0.115654
PPP1R18	MS4A6A	0.115654
CP	DTX3L	0.11559
DTX3L	CP	0.11559
C1QC	CALHM6	0.115308
CALHM6	C1QC	0.115308
C1QC	OSMR	0.114862
OSMR	C1QC	0.114862
CXCL16	OSMR	0.114794
OSMR	CXCL16	0.114794
C1ORF162	CP	0.114648
CP	C1ORF162	0.114648
CP	UBALD2	0.113928
UBALD2	CP	0.113928
C1QC	TMEM119	0.113429
TMEM119	C1QC	0.113429
C1QC	FGL2	0.113422
FGL2	C1QC	0.113422
METRNL	SOCS3	0.113392
SOCS3	METRNL	0.113392
C11ORF96	FYB1	0.112988
FYB1	C11ORF96	0.112988
ACSL5	SOCS3	0.1128
SOCS3	ACSL5	0.1128
C1ORF162	PIK3AP1	0.112669
PIK3AP1	C1ORF162	0.112669
ACSL5	SMIM3	0.112554
SMIM3	ACSL5	0.112554
C1QC	DTX3L	0.111482
DTX3L	C1QC	0.111482
C1QC	RAB27A	0.111262
RAB27A	C1QC	0.111262
C1QC	IL6R	0.111247
IL6R	C1QC	0.111247
OSMR	PARP9	0.111167
PARP9	OSMR	0.111167
C11ORF96	CXCL16	0.110865
CXCL16	C11ORF96	0.110865
C11ORF96	METRNL	0.110758
METRNL	C11ORF96	0.110758
S1PR3	VMP1	0.110494
VMP1	S1PR3	0.110494
FYB1	OSMR	0.110314
OSMR	FYB1	0.110314
FYB1	SOCS3	0.109938
SOCS3	FYB1	0.109938
ARHGAP18	CXCL16	0.109638
CXCL16	ARHGAP18	0.109638
C1ORF162	METRNL	0.109441
METRNL	C1ORF162	0.109441
CXCL16	S1PR3	0.10944
S1PR3	CXCL16	0.10944
SOCS3	VMP1	0.108547
VMP1	SOCS3	0.108547
AKNA	UBALD2	0.108485
UBALD2	AKNA	0.108485
IL6R	RAB27A	0.108432
RAB27A	IL6R	0.108432
ACSL5	IL6R	0.108226
IL6R	ACSL5	0.108226
CALHM6	OSMR	0.108116
OSMR	CALHM6	0.108116
AKNA	C1ORF162	0.107854
C1ORF162	AKNA	0.107854
AKNA	C1QC	0.107388
C1QC	AKNA	0.107388
C11ORF96	CALHM6	0.107241
CALHM6	C11ORF96	0.107241
CXCL16	SYK	0.106431
SYK	CXCL16	0.106431
CXCL16	VMP1	0.106252
VMP1	CXCL16	0.106252
METRNL	SMIM3	0.106247
SMIM3	METRNL	0.106247
IL17RA	OSMR	0.106243
OSMR	IL17RA	0.106243
CXCL16	SOCS3	0.106181
SOCS3	CXCL16	0.106181
DTX3L	SOCS3	0.105803
SOCS3	DTX3L	0.105803
SLC25A19	UBALD2	0.105761
UBALD2	SLC25A19	0.105761
CP	CXCL16	0.105604
CXCL16	CP	0.105604
CXCL16	IL6R	0.10503
IL6R	CXCL16	0.10503
DTX3L	SMIM3	0.104951
SMIM3	DTX3L	0.104951
CXCL16	FYB1	0.104895
FYB1	CXCL16	0.104895
C1QC	MS4A7	0.104841
MS4A7	C1QC	0.104841
PPP1R18	SLC25A19	0.104687
SLC25A19	PPP1R18	0.104687
AKNA	S1PR3	0.104618
S1PR3	AKNA	0.104618
GBP1	PPP1R18	0.104277
PPP1R18	GBP1	0.104277
APBB1IP	MS4A6A	0.103799
MS4A6A	APBB1IP	0.103799
CXCL16	SMIM3	0.103587
SMIM3	CXCL16	0.103587
C1QC	HAVCR2	0.10286
HAVCR2	C1QC	0.10286
CXCL16	METRNL	0.102831
METRNL	CXCL16	0.102831
DTX3L	IL6R	0.102682
IL6R	DTX3L	0.102682
AGTRAP	CP	0.102526
CP	AGTRAP	0.102526
OSMR	SLC25A19	0.102511
SLC25A19	OSMR	0.102511
CP	PIK3AP1	0.102163
PIK3AP1	CP	0.102163
MS4A6A	PIK3AP1	0.101773
PIK3AP1	MS4A6A	0.101773
C1QC	SMIM3	0.101539
SMIM3	C1QC	0.101539
C1ORF162	DTX3L	0.101513
DTX3L	C1ORF162	0.101513
CXCL16	MS4A6A	0.101427
MS4A6A	CXCL16	0.101427
GBP4	HELZ2	0.101393
HELZ2	GBP4	0.101393
C1ORF162	CALHM6	0.101198
CALHM6	C1ORF162	0.101198
PARP9	S1PR3	0.101134
S1PR3	PARP9	0.101134
C1QC	ZC3HAV1	0.101088
ZC3HAV1	C1QC	0.101088
CALHM6	FYB1	0.100749
FYB1	CALHM6	0.100749
CXCL16	HAVCR2	0.100696
HAVCR2	CXCL16	0.100696
C1ORF162	CXCL16	0.100667
CXCL16	C1ORF162	0.100667
HCST	PPP1R18	0.100655
PPP1R18	HCST	0.100655
CXCL16	RAB27A	0.100604
RAB27A	CXCL16	0.100604
PIK3AP1	SOCS3	0.100295
SOCS3	PIK3AP1	0.100295
C1QC	IL18BP	0.100206
IL18BP	C1QC	0.100206
CALHM6	SOCS3	0.100202
SOCS3	CALHM6	0.100202
C1ORF162	PARP9	0.099433
PARP9	C1ORF162	0.099433
METRNL	RAB27A	0.0991894
RAB27A	METRNL	0.0991894
PIK3AP1	SMIM3	0.0988806
SMIM3	PIK3AP1	0.0988806
FYB1	MS4A6A	0.0986114
MS4A6A	FYB1	0.0986114
CXCL16	UBALD2	0.098601
UBALD2	CXCL16	0.098601
AGTRAP	OSMR	0.0985905
OSMR	AGTRAP	0.0985905
ARHGAP18	OSMR	0.0982929
OSMR	ARHGAP18	0.0982929
FYB1	VMP1	0.0981691
VMP1	FYB1	0.0981691
CALHM6	S1PR3	0.0980924
S1PR3	CALHM6	0.0980924
C1ORF162	VMP1	0.0979273
VMP1	C1ORF162	0.0979273
FYB1	S1PR3	0.0979268
S1PR3	FYB1	0.0979268
AKNA	CXCL16	0.0978657
CXCL16	AKNA	0.0978657
C1ORF162	FERMT3	0.0977192
FERMT3	C1ORF162	0.0977192
C1QC	UBALD2	0.0975982
UBALD2	C1QC	0.0975982
ACSL5	CP	0.0975501
CP	ACSL5	0.0975501
OSMR	TRIM56	0.0973504
TRIM56	OSMR	0.0973504
CTSS	PPP1R18	0.0969715
PPP1R18	CTSS	0.0969715
PIK3AP1	VMP1	0.0967204
VMP1	PIK3AP1	0.0967204
FXYD5	PPP1R18	0.0966549
PPP1R18	FXYD5	0.0966549
MS4A6A	VMP1	0.0965848
VMP1	MS4A6A	0.0965848
ACSL5	CXCL16	0.096201
CXCL16	ACSL5	0.096201
C1QC	GBP1	0.0961533
GBP1	C1QC	0.0961533
C1ORF162	IL17RA	0.0960856
IL17RA	C1ORF162	0.0960856
PPP1R18	SCAMP2	0.0960534
SCAMP2	PPP1R18	0.0960534
GBP3	OSMR	0.0958465
OSMR	GBP3	0.0958465
FERMT3	OSMR	0.0957773
OSMR	FERMT3	0.0957773
FYB1	PIK3AP1	0.0955238
PIK3AP1	FYB1	0.0955238
C1ORF162	FYB1	0.0953093
FYB1	C1ORF162	0.0953093
IL17RA	S1PR3	0.0948611
S1PR3	IL17RA	0.0948611
IL6R	VMP1	0.0946852
VMP1	IL6R	0.0946852
APBB1IP	CXCL16	0.0945606
CXCL16	APBB1IP	0.0945606
C1QC	METRNL	0.0945189
METRNL	C1QC	0.0945189
AGTRAP	PPP1R18	0.0944018
PPP1R18	AGTRAP	0.0944018
AKNA	C11ORF96	0.0943031
C11ORF96	AKNA	0.0943031
DTX3L	PARP9	0.0942807
PARP9	DTX3L	0.0942807
CXCL16	PARP9	0.0942224
PARP9	CXCL16	0.0942224
PPP1R18	SYK	0.0939706
SYK	PPP1R18	0.0939706
CKLF	OSMR	0.0938698
OSMR	CKLF	0.0938698
C1QC	SYK	0.0937938
SYK	C1QC	0.0937938
IL17RA	PPP1R18	0.0937848
PPP1R18	IL17RA	0.0937848
ARHGAP18	S1PR3	0.0937564
S1PR3	ARHGAP18	0.0937564
CALHM6	CP	0.0936579
CP	CALHM6	0.0936579
MOB3C	OSMR	0.0931908
OSMR	MOB3C	0.0931908
FERMT3	S1PR3	0.092988
S1PR3	FERMT3	0.092988
GBP1	OSMR	0.0928381
OSMR	GBP1	0.0928381
C1QC	GBP2	0.0927409
GBP2	C1QC	0.0927409
CTSS	CXCL16	0.0924805
CXCL16	CTSS	0.0924805
IL6R	METRNL	0.0924674
METRNL	IL6R	0.0924674
HAVCR2	PPP1R18	0.0924016
PPP1R18	HAVCR2	0.0924016
CXCL16	DTX3L	0.0923952
DTX3L	CXCL16	0.0923952
CALHM6	CXCL16	0.0923867
CXCL16	CALHM6	0.0923867
GBP1	S1PR3	0.0923809
S1PR3	GBP1	0.0923809
OSMR	SAMHD1	0.0918158
SAMHD1	OSMR	0.0918158
C11ORF96	GBP1	0.0917892
GBP1	C11ORF96	0.0917892
RAB27A	VMP1	0.0917834
VMP1	RAB27A	0.0917834
OSMR	TNFSF13B	0.0917707
TNFSF13B	OSMR	0.0917707
AGTRAP	SOCS3	0.0917079
SOCS3	AGTRAP	0.0917079
AKNA	METRNL	0.0915461
METRNL	AKNA	0.0915461
FYB1	SMIM3	0.0914845
SMIM3	FYB1	0.0914845
ARHGAP18	PPP1R18	0.091474
PPP1R18	ARHGAP18	0.091474
CXCL16	TNFSF13B	0.0912966
TNFSF13B	CXCL16	0.0912966
CP	GBP1	0.091205
GBP1	CP	0.091205
OSMR	PARP14	0.0911392
PARP14	OSMR	0.0911392
AGTRAP	C11ORF96	0.0909025
C11ORF96	AGTRAP	0.0909025
PARP14	PARP9	0.0907484
PARP9	PARP14	0.0907484
C1QC	TMIGD3	0.0907157
TMIGD3	C1QC	0.0907157
CALHM6	SMIM3	0.0905951
SMIM3	CALHM6	0.0905951
CXCL16	SLFN11	0.0901384
SLFN11	CXCL16	0.0901384
PPP1R18	S100A16	0.0901213
S100A16	PPP1R18	0.0901213
FGL2	PPP1R18	0.0897913
PPP1R18	FGL2	0.0897913
C1ORF162	MS4A6A	0.0896466
MS4A6A	C1ORF162	0.0896466
MS4A6A	S1PR3	0.0896019
S1PR3	MS4A6A	0.0896019
OSMR	PRAM1	0.088688
PRAM1	OSMR	0.088688
IL17RA	MKNK2	0.0884888
MKNK2	IL17RA	0.0884888
STAT2	TRIM56	0.0884432
TRIM56	STAT2	0.0884432
C1QC	DOK3	0.0883356
DOK3	C1QC	0.0883356
MOB3C	UBALD2	0.0883101
UBALD2	MOB3C	0.0883101
ACSL5	RAB27A	0.0882302
RAB27A	ACSL5	0.0882302
PIK3AP1	RAB27A	0.0881365
RAB27A	PIK3AP1	0.0881365
DTX3L	GBP1	0.0880833
GBP1	DTX3L	0.0880833
SMIM3	VMP1	0.08793
VMP1	SMIM3	0.08793
GBP3	S1PR3	0.0879071
S1PR3	GBP3	0.0879071
CXCL16	FGL2	0.0877633
FGL2	CXCL16	0.0877633
ACSL5	PARP9	0.0877582
PARP9	ACSL5	0.0877582
DOK3	S1PR3	0.0876614
S1PR3	DOK3	0.0876614
AKNA	SMIM3	0.0875524
SMIM3	AKNA	0.0875524
ANGPT2	C1ORF162	0.0874132
C1ORF162	ANGPT2	0.0874132
C11ORF96	PARP9	0.0873414
PARP9	C11ORF96	0.0873414
CTSS	S1PR3	0.0872985
S1PR3	CTSS	0.0872985
C1QC	FXYD5	0.087123
FXYD5	C1QC	0.087123
ACSL5	METRNL	0.0870218
METRNL	ACSL5	0.0870218
AKNA	SOCS3	0.0869774
SOCS3	AKNA	0.0869774
C1QC	SCAMP2	0.0869381
SCAMP2	C1QC	0.0869381
C4A	CXCL16	0.0866107
CXCL16	C4A	0.0866107
CP	METRNL	0.0864312
METRNL	CP	0.0864312
C1ORF162	SCAMP2	0.0862307
SCAMP2	C1ORF162	0.0862307
PPP1R18	PRAM1	0.0862306
PRAM1	PPP1R18	0.0862306
IL18BP	PPP1R18	0.0861783
PPP1R18	IL18BP	0.0861783
MS4A6A	MS4A7	0.0861372
MS4A7	MS4A6A	0.0861372
FERMT3	PPP1R18	0.086102
PPP1R18	FERMT3	0.086102
DTX3L	RAB27A	0.0860708
RAB27A	DTX3L	0.0860708
OSMR	TMIGD3	0.0860429
TMIGD3	OSMR	0.0860429
CP	TNFSF13B	0.0859979
TNFSF13B	CP	0.0859979
OSMR	SCAMP2	0.0859759
SCAMP2	OSMR	0.0859759
CXCL16	FXYD5	0.0858889
FXYD5	CXCL16	0.0858889
FXYD5	OSMR	0.0858544
OSMR	FXYD5	0.0858544
APBB1IP	MS4A7	0.0857852
MS4A7	APBB1IP	0.0857852
OSMR	SYK	0.0857604
SYK	OSMR	0.0857604
APBB1IP	PPP1R18	0.0856445
PPP1R18	APBB1IP	0.0856445
DTX3L	PIK3AP1	0.0856314
PIK3AP1	DTX3L	0.0856314
CXCL16	PARP14	0.0856098
PARP14	CXCL16	0.0856098
CXCL16	SCAMP2	0.0854735
SCAMP2	CXCL16	0.0854735
IL18BP	PARP9	0.085469
PARP9	IL18BP	0.085469
S1PR3	TNFSF13B	0.0850227
TNFSF13B	S1PR3	0.0850227
MS4A6A	PARP9	0.0849764
PARP9	MS4A6A	0.0849764
FYB1	IL6R	0.0848793
IL6R	FYB1	0.0848793
S100A16	UBALD2	0.0848593
UBALD2	S100A16	0.0848593
CXCL16	S100A16	0.0847677
S100A16	CXCL16	0.0847677
CALHM6	PIK3AP1	0.0847373
PIK3AP1	CALHM6	0.0847373
PIK3AP1	UBALD2	0.0847356
UBALD2	PIK3AP1	0.0847356
GBP3	PPP1R18	0.0846048
PPP1R18	GBP3	0.0846048
OSMR	TMEM132C	0.0845762
TMEM132C	OSMR	0.0845762
PPP1R18	TMIGD3	0.0845015
TMIGD3	PPP1R18	0.0845015
C1QC	SLFN11	0.084447
SLFN11	C1QC	0.084447
DOK3	PPP1R18	0.0842704
PPP1R18	DOK3	0.0842704
UBALD2	VMP1	0.0842018
VMP1	UBALD2	0.0842018
IL6R	PIK3AP1	0.0840746
PIK3AP1	IL6R	0.0840746
PARP9	PIK3AP1	0.0840365
PIK3AP1	PARP9	0.0840365
DOK3	OSMR	0.084026
OSMR	DOK3	0.084026
C1ORF162	DOK3	0.0839633
DOK3	C1ORF162	0.0839633
C1ORF162	TMIGD3	0.0837443
TMIGD3	C1ORF162	0.0837443
CXCL16	GBP1	0.0835299
GBP1	CXCL16	0.0835299
MKNK2	OSMR	0.0834409
OSMR	MKNK2	0.0834409
AGTRAP	CXCL16	0.0831951
CXCL16	AGTRAP	0.0831951
ARHGAP18	C11ORF96	0.0831553
C11ORF96	ARHGAP18	0.0831553
AGTRAP	IL6R	0.0830262
IL6R	AGTRAP	0.0830262
GBP2	S1PR3	0.0830168
S1PR3	GBP2	0.0830168
IL18BP	OSMR	0.0829241
OSMR	IL18BP	0.0829241
MKNK2	TMEM132C	0.082864
TMEM132C	MKNK2	0.082864
C1ORF162	MKNK2	0.0828554
MKNK2	C1ORF162	0.0828554
CTSS	OSMR	0.0827915
OSMR	CTSS	0.0827915
AKNA	IL6R	0.0827097
IL6R	AKNA	0.0827097
DTX3L	UBALD2	0.0824927
UBALD2	DTX3L	0.0824927
C1QC	GIMAP6	0.0824614
GIMAP6	C1QC	0.0824614
PPP1R18	TMEM119	0.0823856
TMEM119	PPP1R18	0.0823856
OSMR	S100A16	0.0823785
S100A16	OSMR	0.0823785
PARP14	PPP1R18	0.0821467
PPP1R18	PARP14	0.0821467
PARP9	SOCS3	0.0820563
SOCS3	PARP9	0.0820563
C1QC	IL17RA	0.0819804
IL17RA	C1QC	0.0819804
OSMR	SLFN11	0.0815531
SLFN11	OSMR	0.0815531
CALCOCO2	TRIM56	0.0815299
TRIM56	CALCOCO2	0.0815299
ADAP2	TRIM25	0.0814861
TRIM25	ADAP2	0.0814861
MOB3C	PPP1R18	0.0813956
PPP1R18	MOB3C	0.0813956
ACSL5	DTX3L	0.081203
DTX3L	ACSL5	0.081203
AGTRAP	S1PR3	0.0811622
S1PR3	AGTRAP	0.0811622
CALHM6	IL6R	0.0811471
IL6R	CALHM6	0.0811471
C1ORF162	TNFSF13B	0.081147
TNFSF13B	C1ORF162	0.081147
MOB3C	PARP10	0.0811453
PARP10	MOB3C	0.0811453
MS4A6A	OSMR	0.0810915
OSMR	MS4A6A	0.0810915
CALHM6	DTX3L	0.0810464
DTX3L	CALHM6	0.0810464
ARHGAP18	METRNL	0.0810226
METRNL	ARHGAP18	0.0810226
C1QC	S100A16	0.0807475
S100A16	C1QC	0.0807475
C1ORF162	IL18BP	0.0807379
IL18BP	C1ORF162	0.0807379
EHD4	PPP1R18	0.0805974
PPP1R18	EHD4	0.0805974
DTX3L	FYB1	0.0805287
FYB1	DTX3L	0.0805287
IL6R	PARP9	0.0805089
PARP9	IL6R	0.0805089
IKZF1	OSMR	0.080507
OSMR	IKZF1	0.080507
C1ORF162	SLC25A19	0.0804772
SLC25A19	C1ORF162	0.0804772
HAVCR2	OSMR	0.0802987
OSMR	HAVCR2	0.0802987
MKNK2	NRROS	0.0802075
NRROS	MKNK2	0.0802075
PARP9	SMIM3	0.080189
SMIM3	PARP9	0.080189
PARP9	RAB27A	0.0801616
RAB27A	PARP9	0.0801616
C1QC	PTAFR	0.0801058
PTAFR	C1QC	0.0801058
PPP1R18	SLFN11	0.0801
SLFN11	PPP1R18	0.0801
PPP1R18	TRIM56	0.0800489
TRIM56	PPP1R18	0.0800489

## Sheet: pink.defAD.edges
Gene1	Gene2	TO
ADAMTS2	PARP9	0.344396
BATF2	CALHM6	0.372386
BATF2	DDX58	0.349524
BATF2	GBP1	0.397636
BATF2	GBP2	0.407674
BATF2	GBP3	0.379532
BATF2	IL18BP	0.430298
BATF2	NLRC5	0.421315
BATF2	PARP14	0.413338
BATF2	PARP9	0.452855
BATF2	RSAD2	0.377513
BATF2	SAMD9L	0.383527
BATF2	TAP2	0.384262
BATF2	XAF1	0.336033
CALHM6	BATF2	0.372386
CALHM6	CMPK2	0.402793
CALHM6	DDX58	0.385231
CALHM6	DDX60L	0.372439
CALHM6	DTX3L	0.354714
CALHM6	GBP1	0.407619
CALHM6	GBP2	0.405586
CALHM6	GBP3	0.399116
CALHM6	GBP5	0.335687
CALHM6	HLA-DOA	0.339164
CALHM6	IFIT2	0.385227
CALHM6	IFIT3	0.401871
CALHM6	IL18BP	0.427286
CALHM6	IRF1	0.393406
CALHM6	METTL7B	0.344254
CALHM6	NLRC5	0.431035
CALHM6	OAS2	0.351501
CALHM6	PARP14	0.412566
CALHM6	PARP9	0.450658
CALHM6	RSAD2	0.418426
CALHM6	SAMD9	0.38231
CALHM6	SAMD9L	0.375989
CALHM6	SPOCD1	0.358079
CALHM6	SYTL1	0.361215
CALHM6	TAP2	0.395146
CALHM6	XAF1	0.371406
CALHM6	ZC3HAV1	0.346079
CALHM6	ZNFX1	0.342
CMPK2	CALHM6	0.402793
CMPK2	DDX58	0.372211
CMPK2	DTX3L	0.338364
CMPK2	GBP1	0.430554
CMPK2	GBP2	0.430762
CMPK2	GBP3	0.423788
CMPK2	IFIT2	0.369231
CMPK2	IFIT3	0.374976
CMPK2	IL18BP	0.450551
CMPK2	IRF1	0.345198
CMPK2	NLRC5	0.454534
CMPK2	PARP14	0.441068
CMPK2	PARP9	0.479542
CMPK2	RSAD2	0.406335
CMPK2	SAMD9	0.332287
CMPK2	SAMD9L	0.396432
CMPK2	TAP2	0.418455
CMPK2	XAF1	0.374143
DDX58	BATF2	0.349524
DDX58	CALHM6	0.385231
DDX58	CMPK2	0.372211
DDX58	DDX60L	0.352203
DDX58	GBP1	0.41072
DDX58	GBP2	0.42037
DDX58	GBP3	0.395024
DDX58	IFIT2	0.353039
DDX58	IFIT3	0.362423
DDX58	IL18BP	0.440692
DDX58	IRF1	0.372212
DDX58	NLRC5	0.434585
DDX58	PARP14	0.425133
DDX58	PARP9	0.465256
DDX58	RSAD2	0.3915
DDX58	SAMD9	0.356739
DDX58	SAMD9L	0.391551
DDX58	SPOCD1	0.330112
DDX58	SYTL1	0.343926
DDX58	TAP2	0.401921
DDX58	XAF1	0.3534
DDX58	ZC3HAV1	0.33236
DDX60L	CALHM6	0.372439
DDX60L	DDX58	0.352203
DDX60L	GBP1	0.392942
DDX60L	GBP2	0.398274
DDX60L	GBP3	0.383054
DDX60L	IFIT3	0.330835
DDX60L	IL18BP	0.419618
DDX60L	NLRC5	0.420358
DDX60L	PARP14	0.405072
DDX60L	PARP9	0.442439
DDX60L	RSAD2	0.371307
DDX60L	SAMD9L	0.368488
DDX60L	TAP2	0.380016
DDX60L	XAF1	0.341327
DTX3L	CALHM6	0.354714
DTX3L	CMPK2	0.338364
DTX3L	GBP1	0.370045
DTX3L	GBP2	0.362514
DTX3L	GBP3	0.365857
DTX3L	IFIT3	0.339995
DTX3L	IL18BP	0.388369
DTX3L	NLRC5	0.389783
DTX3L	PARP14	0.375533
DTX3L	PARP9	0.409734
DTX3L	RSAD2	0.343992
DTX3L	SAMD9L	0.337156
DTX3L	TAP2	0.350236
GBP1	BATF2	0.397636
GBP1	CALHM6	0.407619
GBP1	CMPK2	0.430554
GBP1	DDX58	0.41072
GBP1	DDX60L	0.392942
GBP1	DTX3L	0.370045
GBP1	GBP2	0.422986
GBP1	GBP3	0.413825
GBP1	GBP4	0.337333
GBP1	GBP5	0.368047
GBP1	GIMAP2	0.346117
GBP1	HIST1H4H	0.330369
GBP1	HLA-DOA	0.357052
GBP1	IFIT2	0.411412
GBP1	IFIT3	0.427842
GBP1	IL18BP	0.439458
GBP1	IRF1	0.422469
GBP1	METTL7B	0.364083
GBP1	NLRC5	0.440034
GBP1	OAS2	0.372207
GBP1	PARP14	0.426111
GBP1	PARP9	0.46453
GBP1	RSAD2	0.449649
GBP1	SAMD9	0.404662
GBP1	SAMD9L	0.404974
GBP1	SPOCD1	0.387037
GBP1	STAT2	0.339989
GBP1	SYTL1	0.383558
GBP1	TAP2	0.424795
GBP1	TNFSF13B	0.344999
GBP1	TRIM25	0.344236
GBP1	XAF1	0.393574
GBP1	ZC3HAV1	0.371823
GBP1	ZNFX1	0.365882
GBP2	BATF2	0.407674
GBP2	CALHM6	0.405586
GBP2	CMPK2	0.430762
GBP2	DDX58	0.42037
GBP2	DDX60L	0.398274
GBP2	DTX3L	0.362514
GBP2	GBP1	0.422986
GBP2	GBP3	0.408284
GBP2	GBP4	0.34374
GBP2	GBP5	0.386241
GBP2	GIMAP2	0.355872
GBP2	HIST1H4H	0.344569
GBP2	HLA-DOA	0.363159
GBP2	IFIT2	0.407212
GBP2	IFIT3	0.420753
GBP2	IL18BP	0.449971
GBP2	IRF1	0.437406
GBP2	METTL7B	0.371165
GBP2	MOV10	0.335494
GBP2	NLRC5	0.444803
GBP2	OAS2	0.377955
GBP2	PARP14	0.435018
GBP2	PARP9	0.475781
GBP2	RSAD2	0.456234
GBP2	SAMD9	0.409416
GBP2	SAMD9L	0.41544
GBP2	SPOCD1	0.394505
GBP2	STAT2	0.334258
GBP2	SYTL1	0.395283
GBP2	TAP2	0.431206
GBP2	TNFSF13B	0.349426
GBP2	TRIM25	0.356936
GBP2	XAF1	0.388256
GBP2	ZC3HAV1	0.380019
GBP2	ZNFX1	0.36781
GBP3	BATF2	0.379532
GBP3	CALHM6	0.399116
GBP3	CMPK2	0.423788
GBP3	DDX58	0.395024
GBP3	DDX60L	0.383054
GBP3	DTX3L	0.365857
GBP3	GBP1	0.413825
GBP3	GBP2	0.408284
GBP3	GBP5	0.343385
GBP3	HLA-DOA	0.34106
GBP3	IFIT2	0.407227
GBP3	IFIT3	0.425136
GBP3	IL18BP	0.429318
GBP3	IRF1	0.40053
GBP3	METTL7B	0.356324
GBP3	NLRC5	0.437752
GBP3	OAS2	0.357002
GBP3	PARP14	0.418341
GBP3	PARP9	0.454662
GBP3	RSAD2	0.434398
GBP3	SAMD9	0.392304
GBP3	SAMD9L	0.3838
GBP3	SPOCD1	0.367851
GBP3	STAT2	0.34727
GBP3	SYTL1	0.366853
GBP3	TAP2	0.408999
GBP3	XAF1	0.387804
GBP3	ZC3HAV1	0.352574
GBP3	ZNFX1	0.358709
GBP4	GBP1	0.337333
GBP4	GBP2	0.34374
GBP4	IL18BP	0.369013
GBP4	NLRC5	0.35642
GBP4	PARP14	0.354138
GBP4	PARP9	0.389789
GBP4	SAMD9L	0.331178
GBP5	CALHM6	0.335687
GBP5	GBP1	0.368047
GBP5	GBP2	0.386241
GBP5	GBP3	0.343385
GBP5	IL18BP	0.397408
GBP5	NLRC5	0.379175
GBP5	PARP14	0.388599
GBP5	PARP9	0.42414
GBP5	RSAD2	0.346288
GBP5	SAMD9L	0.365367
GBP5	TAP2	0.359023
GIMAP2	GBP1	0.346117
GIMAP2	GBP2	0.355872
GIMAP2	IL18BP	0.380099
GIMAP2	NLRC5	0.361877
GIMAP2	PARP14	0.364855
GIMAP2	PARP9	0.4015
GIMAP2	SAMD9L	0.344386
GIMAP2	TAP2	0.339632
HELZ2	IL18BP	0.345861
HELZ2	NLRC5	0.339261
HELZ2	PARP14	0.331549
HELZ2	PARP9	0.364713
HIST1H4H	GBP1	0.330369
HIST1H4H	GBP2	0.344569
HIST1H4H	IL18BP	0.356033
HIST1H4H	NLRC5	0.353295
HIST1H4H	PARP14	0.333415
HIST1H4H	PARP9	0.369905
HLA-DOA	CALHM6	0.339164
HLA-DOA	GBP1	0.357052
HLA-DOA	GBP2	0.363159
HLA-DOA	GBP3	0.34106
HLA-DOA	IL18BP	0.388406
HLA-DOA	NLRC5	0.375582
HLA-DOA	PARP14	0.370573
HLA-DOA	PARP9	0.407341
HLA-DOA	SAMD9L	0.346681
HLA-DOA	TAP2	0.344543
IFIT2	CALHM6	0.385227
IFIT2	CMPK2	0.369231
IFIT2	DDX58	0.353039
IFIT2	GBP1	0.411412
IFIT2	GBP2	0.407212
IFIT2	GBP3	0.407227
IFIT2	IFIT3	0.367896
IFIT2	IL18BP	0.427459
IFIT2	IRF1	0.341923
IFIT2	NLRC5	0.433812
IFIT2	PARP14	0.420642
IFIT2	PARP9	0.454579
IFIT2	RSAD2	0.381617
IFIT2	SAMD9	0.334951
IFIT2	SAMD9L	0.37355
IFIT2	TAP2	0.39432
IFIT2	XAF1	0.360753
IFIT3	CALHM6	0.401871
IFIT3	CMPK2	0.374976
IFIT3	DDX58	0.362423
IFIT3	DDX60L	0.330835
IFIT3	DTX3L	0.339995
IFIT3	GBP1	0.427842
IFIT3	GBP2	0.420753
IFIT3	GBP3	0.425136
IFIT3	IFIT2	0.367896
IFIT3	IL18BP	0.442204
IFIT3	IRF1	0.34581
IFIT3	NLRC5	0.452136
IFIT3	PARP14	0.433749
IFIT3	PARP9	0.469995
IFIT3	RSAD2	0.398758
IFIT3	SAMD9	0.338011
IFIT3	SAMD9L	0.385762
IFIT3	TAP2	0.408077
IFIT3	XAF1	0.374786
IL18BP	BATF2	0.430298
IL18BP	CALHM6	0.427286
IL18BP	CMPK2	0.450551
IL18BP	DDX58	0.440692
IL18BP	DDX60L	0.419618
IL18BP	DTX3L	0.388369
IL18BP	GBP1	0.439458
IL18BP	GBP2	0.449971
IL18BP	GBP3	0.429318
IL18BP	GBP4	0.369013
IL18BP	GBP5	0.397408
IL18BP	GIMAP2	0.380099
IL18BP	HELZ2	0.345861
IL18BP	HIST1H4H	0.356033
IL18BP	HLA-DOA	0.388406
IL18BP	IFIT2	0.427459
IL18BP	IFIT3	0.442204
IL18BP	IRF1	0.450711
IL18BP	METTL7B	0.395257
IL18BP	MOV10	0.359592
IL18BP	NLRC5	0.442583
IL18BP	OAS2	0.401659
IL18BP	PARP14	0.432071
IL18BP	PARP9	0.461444
IL18BP	RSAD2	0.475808
IL18BP	SAMD9	0.425927
IL18BP	SAMD9L	0.438653
IL18BP	SPOCD1	0.407929
IL18BP	STAT2	0.348548
IL18BP	SYTL1	0.41872
IL18BP	TAP2	0.454681
IL18BP	TNFSF13B	0.376881
IL18BP	TRIM25	0.378379
IL18BP	TRIM56	0.330528
IL18BP	XAF1	0.412791
IL18BP	ZC3HAV1	0.410275
IL18BP	ZNFX1	0.392008
IRF1	CALHM6	0.393406
IRF1	CMPK2	0.345198
IRF1	DDX58	0.372212
IRF1	GBP1	0.422469
IRF1	GBP2	0.437406
IRF1	GBP3	0.40053
IRF1	IFIT2	0.341923
IRF1	IFIT3	0.34581
IRF1	IL18BP	0.450711
IRF1	NLRC5	0.444869
IRF1	PARP14	0.432568
IRF1	PARP9	0.475744
IRF1	RSAD2	0.400495
IRF1	SAMD9L	0.406818
IRF1	TAP2	0.407888
IRF1	XAF1	0.351777
METTL7B	CALHM6	0.344254
METTL7B	GBP1	0.364083
METTL7B	GBP2	0.371165
METTL7B	GBP3	0.356324
METTL7B	IL18BP	0.395257
METTL7B	NLRC5	0.392647
METTL7B	PARP14	0.381725
METTL7B	PARP9	0.416588
METTL7B	RSAD2	0.346851
METTL7B	SAMD9L	0.345577
METTL7B	TAP2	0.355541
MOV10	GBP2	0.335494
MOV10	IL18BP	0.359592
MOV10	NLRC5	0.341804
MOV10	PARP14	0.349644
MOV10	PARP9	0.382375
NLRC5	BATF2	0.421315
NLRC5	CALHM6	0.431035
NLRC5	CMPK2	0.454534
NLRC5	DDX58	0.434585
NLRC5	DDX60L	0.420358
NLRC5	DTX3L	0.389783
NLRC5	GBP1	0.440034
NLRC5	GBP2	0.444803
NLRC5	GBP3	0.437752
NLRC5	GBP4	0.35642
NLRC5	GBP5	0.379175
NLRC5	GIMAP2	0.361877
NLRC5	HELZ2	0.339261
NLRC5	HIST1H4H	0.353295
NLRC5	HLA-DOA	0.375582
NLRC5	IFIT2	0.433812
NLRC5	IFIT3	0.452136
NLRC5	IL18BP	0.442583
NLRC5	IRF1	0.444869
NLRC5	METTL7B	0.392647
NLRC5	MOV10	0.341804
NLRC5	OAS2	0.395798
NLRC5	PARP14	0.428382
NLRC5	PARP9	0.467386
NLRC5	RSAD2	0.474744
NLRC5	SAMD9	0.42978
NLRC5	SAMD9L	0.423026
NLRC5	SPOCD1	0.40803
NLRC5	STAT2	0.362537
NLRC5	SYTL1	0.408555
NLRC5	TAP2	0.445501
NLRC5	TNFSF13B	0.359093
NLRC5	TRIM25	0.355813
NLRC5	XAF1	0.41422
NLRC5	ZC3HAV1	0.387184
NLRC5	ZNFX1	0.384989
OAS2	CALHM6	0.351501
OAS2	GBP1	0.372207
OAS2	GBP2	0.377955
OAS2	GBP3	0.357002
OAS2	IL18BP	0.401659
OAS2	NLRC5	0.395798
OAS2	PARP14	0.38404
OAS2	PARP9	0.420634
OAS2	RSAD2	0.348801
OAS2	SAMD9L	0.356378
OAS2	TAP2	0.354427
PARP14	BATF2	0.413338
PARP14	CALHM6	0.412566
PARP14	CMPK2	0.441068
PARP14	DDX58	0.425133
PARP14	DDX60L	0.405072
PARP14	DTX3L	0.375533
PARP14	GBP1	0.426111
PARP14	GBP2	0.435018
PARP14	GBP3	0.418341
PARP14	GBP4	0.354138
PARP14	GBP5	0.388599
PARP14	GIMAP2	0.364855
PARP14	HELZ2	0.331549
PARP14	HIST1H4H	0.333415
PARP14	HLA-DOA	0.370573
PARP14	IFIT2	0.420642
PARP14	IFIT3	0.433749
PARP14	IL18BP	0.432071
PARP14	IRF1	0.432568
PARP14	METTL7B	0.381725
PARP14	MOV10	0.349644
PARP14	NLRC5	0.428382
PARP14	OAS2	0.38404
PARP14	PARP9	0.457492
PARP14	RSAD2	0.46222
PARP14	SAMD9	0.410049
PARP14	SAMD9L	0.423007
PARP14	SPOCD1	0.392401
PARP14	STAT2	0.349775
PARP14	SYTL1	0.403169
PARP14	TAP2	0.441745
PARP14	TNFSF13B	0.361328
PARP14	TRIM25	0.365831
PARP14	TRIM56	0.332367
PARP14	XAF1	0.402625
PARP14	ZC3HAV1	0.395691
PARP14	ZNFX1	0.385591
PARP9	ADAMTS2	0.344396
PARP9	BATF2	0.452855
PARP9	CALHM6	0.450658
PARP9	CMPK2	0.479542
PARP9	DDX58	0.465256
PARP9	DDX60L	0.442439
PARP9	DTX3L	0.409734
PARP9	GBP1	0.46453
PARP9	GBP2	0.475781
PARP9	GBP3	0.454662
PARP9	GBP4	0.389789
PARP9	GBP5	0.42414
PARP9	GIMAP2	0.4015
PARP9	HELZ2	0.364713
PARP9	HIST1H4H	0.369905
PARP9	HLA-DOA	0.407341
PARP9	IFIT2	0.454579
PARP9	IFIT3	0.469995
PARP9	IL18BP	0.461444
PARP9	IRF1	0.475744
PARP9	METTL7B	0.416588
PARP9	MOV10	0.382375
PARP9	NLRC5	0.467386
PARP9	OAS2	0.420634
PARP9	PARP14	0.457492
PARP9	RNF213	0.351299
PARP9	RSAD2	0.503962
PARP9	SAMD9	0.44923
PARP9	SAMD9L	0.463168
PARP9	SAMHD1	0.337103
PARP9	SPOCD1	0.430625
PARP9	STAT2	0.374643
PARP9	SYTL1	0.44295
PARP9	TAP2	0.481587
PARP9	TNFSF13B	0.396502
PARP9	TRIM25	0.402279
PARP9	TRIM56	0.354418
PARP9	TRIM69	0.34296
PARP9	XAF1	0.437283
PARP9	ZC3HAV1	0.432923
PARP9	ZNFX1	0.417354
RNF213	PARP9	0.351299
RSAD2	BATF2	0.377513
RSAD2	CALHM6	0.418426
RSAD2	CMPK2	0.406335
RSAD2	DDX58	0.3915
RSAD2	DDX60L	0.371307
RSAD2	DTX3L	0.343992
RSAD2	GBP1	0.449649
RSAD2	GBP2	0.456234
RSAD2	GBP3	0.434398
RSAD2	GBP5	0.346288
RSAD2	IFIT2	0.381617
RSAD2	IFIT3	0.398758
RSAD2	IL18BP	0.475808
RSAD2	IRF1	0.400495
RSAD2	METTL7B	0.346851
RSAD2	NLRC5	0.474744
RSAD2	OAS2	0.348801
RSAD2	PARP14	0.46222
RSAD2	PARP9	0.503962
RSAD2	SAMD9	0.376767
RSAD2	SAMD9L	0.422325
RSAD2	SPOCD1	0.358268
RSAD2	SYTL1	0.368599
RSAD2	TAP2	0.436251
RSAD2	XAF1	0.382457
RSAD2	ZC3HAV1	0.348769
RSAD2	ZNFX1	0.342271
SAMD9	CALHM6	0.38231
SAMD9	CMPK2	0.332287
SAMD9	DDX58	0.356739
SAMD9	GBP1	0.404662
SAMD9	GBP2	0.409416
SAMD9	GBP3	0.392304
SAMD9	IFIT2	0.334951
SAMD9	IFIT3	0.338011
SAMD9	IL18BP	0.425927
SAMD9	NLRC5	0.42978
SAMD9	PARP14	0.410049
SAMD9	PARP9	0.44923
SAMD9	RSAD2	0.376767
SAMD9	SAMD9L	0.376963
SAMD9	TAP2	0.385521
SAMD9	XAF1	0.34752
SAMD9L	BATF2	0.383527
SAMD9L	CALHM6	0.375989
SAMD9L	CMPK2	0.396432
SAMD9L	DDX58	0.391551
SAMD9L	DDX60L	0.368488
SAMD9L	DTX3L	0.337156
SAMD9L	GBP1	0.404974
SAMD9L	GBP2	0.41544
SAMD9L	GBP3	0.3838
SAMD9L	GBP4	0.331178
SAMD9L	GBP5	0.365367
SAMD9L	GIMAP2	0.344386
SAMD9L	HLA-DOA	0.346681
SAMD9L	IFIT2	0.37355
SAMD9L	IFIT3	0.385762
SAMD9L	IL18BP	0.438653
SAMD9L	IRF1	0.406818
SAMD9L	METTL7B	0.345577
SAMD9L	NLRC5	0.423026
SAMD9L	OAS2	0.356378
SAMD9L	PARP14	0.423007
SAMD9L	PARP9	0.463168
SAMD9L	RSAD2	0.422325
SAMD9L	SAMD9	0.376963
SAMD9L	SPOCD1	0.365581
SAMD9L	SYTL1	0.375297
SAMD9L	TAP2	0.404577
SAMD9L	TNFSF13B	0.337529
SAMD9L	TRIM25	0.347623
SAMD9L	XAF1	0.361043
SAMD9L	ZC3HAV1	0.369974
SAMD9L	ZNFX1	0.346836
SAMHD1	PARP9	0.337103
SPOCD1	CALHM6	0.358079
SPOCD1	DDX58	0.330112
SPOCD1	GBP1	0.387037
SPOCD1	GBP2	0.394505
SPOCD1	GBP3	0.367851
SPOCD1	IL18BP	0.407929
SPOCD1	NLRC5	0.40803
SPOCD1	PARP14	0.392401
SPOCD1	PARP9	0.430625
SPOCD1	RSAD2	0.358268
SPOCD1	SAMD9L	0.365581
SPOCD1	TAP2	0.361639
STAT2	GBP1	0.339989
STAT2	GBP2	0.334258
STAT2	GBP3	0.34727
STAT2	IL18BP	0.348548
STAT2	NLRC5	0.362537
STAT2	PARP14	0.349775
STAT2	PARP9	0.374643
SYTL1	CALHM6	0.361215
SYTL1	DDX58	0.343926
SYTL1	GBP1	0.383558
SYTL1	GBP2	0.395283
SYTL1	GBP3	0.366853
SYTL1	IL18BP	0.41872
SYTL1	NLRC5	0.408555
SYTL1	PARP14	0.403169
SYTL1	PARP9	0.44295
SYTL1	RSAD2	0.368599
SYTL1	SAMD9L	0.375297
SYTL1	TAP2	0.377102
TAP2	BATF2	0.384262
TAP2	CALHM6	0.395146
TAP2	CMPK2	0.418455
TAP2	DDX58	0.401921
TAP2	DDX60L	0.380016
TAP2	DTX3L	0.350236
TAP2	GBP1	0.424795
TAP2	GBP2	0.431206
TAP2	GBP3	0.408999
TAP2	GBP5	0.359023
TAP2	GIMAP2	0.339632
TAP2	HLA-DOA	0.344543
TAP2	IFIT2	0.39432
TAP2	IFIT3	0.408077
TAP2	IL18BP	0.454681
TAP2	IRF1	0.407888
TAP2	METTL7B	0.355541
TAP2	NLRC5	0.445501
TAP2	OAS2	0.354427
TAP2	PARP14	0.441745
TAP2	PARP9	0.481587
TAP2	RSAD2	0.436251
TAP2	SAMD9	0.385521
TAP2	SAMD9L	0.404577
TAP2	SPOCD1	0.361639
TAP2	SYTL1	0.377102
TAP2	TNFSF13B	0.336494
TAP2	TRIM25	0.338465
TAP2	XAF1	0.375987
TAP2	ZC3HAV1	0.370723
TAP2	ZNFX1	0.358366
TNFSF13B	GBP1	0.344999
TNFSF13B	GBP2	0.349426
TNFSF13B	IL18BP	0.376881
TNFSF13B	NLRC5	0.359093
TNFSF13B	PARP14	0.361328
TNFSF13B	PARP9	0.396502
TNFSF13B	SAMD9L	0.337529
TNFSF13B	TAP2	0.336494
TRIM25	GBP1	0.344236
TRIM25	GBP2	0.356936
TRIM25	IL18BP	0.378379
TRIM25	NLRC5	0.355813
TRIM25	PARP14	0.365831
TRIM25	PARP9	0.402279
TRIM25	SAMD9L	0.347623
TRIM25	TAP2	0.338465
TRIM56	IL18BP	0.330528
TRIM56	PARP14	0.332367
TRIM56	PARP9	0.354418
TRIM69	PARP9	0.34296
XAF1	BATF2	0.336033
XAF1	CALHM6	0.371406
XAF1	CMPK2	0.374143
XAF1	DDX58	0.3534
XAF1	DDX60L	0.341327
XAF1	GBP1	0.393574
XAF1	GBP2	0.388256
XAF1	GBP3	0.387804
XAF1	IFIT2	0.360753
XAF1	IFIT3	0.374786
XAF1	IL18BP	0.412791
XAF1	IRF1	0.351777
XAF1	NLRC5	0.41422
XAF1	PARP14	0.402625
XAF1	PARP9	0.437283
XAF1	RSAD2	0.382457
XAF1	SAMD9	0.34752
XAF1	SAMD9L	0.361043
XAF1	TAP2	0.375987
ZC3HAV1	CALHM6	0.346079
ZC3HAV1	DDX58	0.33236
ZC3HAV1	GBP1	0.371823
ZC3HAV1	GBP2	0.380019
ZC3HAV1	GBP3	0.352574
ZC3HAV1	IL18BP	0.410275
ZC3HAV1	NLRC5	0.387184
ZC3HAV1	PARP14	0.395691
ZC3HAV1	PARP9	0.432923
ZC3HAV1	RSAD2	0.348769
ZC3HAV1	SAMD9L	0.369974
ZC3HAV1	TAP2	0.370723
ZNFX1	CALHM6	0.342
ZNFX1	GBP1	0.365882
ZNFX1	GBP2	0.36781
ZNFX1	GBP3	0.358709
ZNFX1	IL18BP	0.392008
ZNFX1	NLRC5	0.384989
ZNFX1	PARP14	0.385591
ZNFX1	PARP9	0.417354
ZNFX1	RSAD2	0.342271
ZNFX1	SAMD9L	0.346836
ZNFX1	TAP2	0.358366

## Sheet: darkgrey.CTR.nodes
Gene	Kin
ZBTB20	1
FAM107B	0.93729
FAR1	0.937203
ZSWIM6	0.91813
DNAJC15	0.91605
UBN2	0.894714
TEAD1	0.855313
ZDHHC9	0.831495
SNX9	0.789947
NUDCD2	0.786092
NAV1	0.772857
SBDSP1	0.717569
RBM22	0.703049
RTF2	0.676522
FGD4	0.660058
MCMBP	0.653741
KRCC1	0.635145
KLHL5	0.627016
STMP1	0.613189
TMBIM4	0.603376
MAP4K4	0.582758
NFIA	0.575324
CRIPT	0.575159
ARMC1	0.527274

## Sheet: darkgrey.proAD.nodes
Gene	Kin
ZBTB20	1
UBN2	0.948409
ZSWIM6	0.926518
TEAD1	0.897433
FAR1	0.854102
RBM22	0.835485
ZDHHC9	0.792703
FAM107B	0.778268
MCMBP	0.772612
SBDSP1	0.756429
DNAJC15	0.724825
NUDCD2	0.721112
TMBIM4	0.664103
FGD4	0.659922
KLHL5	0.641332
STMP1	0.603764
SNX9	0.600136
KRCC1	0.570958
NFIA	0.569971
CRIPT	0.549041
RTF2	0.534837
MAP4K4	0.481867
NAV1	0.470164
ARMC1	0.315076

## Sheet: darkgrey.defAD.nodes
Gene	Kin
ZBTB20	1
FAM107B	0.93729
FAR1	0.937203
ZSWIM6	0.91813
DNAJC15	0.91605
UBN2	0.894714
TEAD1	0.855313
ZDHHC9	0.831495
SNX9	0.789947
NUDCD2	0.786092
NAV1	0.772857
SBDSP1	0.717569
RBM22	0.703049
RTF2	0.676522
FGD4	0.660058
MCMBP	0.653741
KRCC1	0.635145
KLHL5	0.627016
STMP1	0.613189
TMBIM4	0.603376
MAP4K4	0.582758
NFIA	0.575324
CRIPT	0.575159
ARMC1	0.527274

## Sheet: darkgrey.CTR.edges
Gene1	Gene2	TO
FAM107B	ZDHHC9	0.327357
ZDHHC9	FAM107B	0.327357
NFIA	ZBTB20	0.32279
ZBTB20	NFIA	0.32279
FAM107B	ZBTB20	0.319263
ZBTB20	FAM107B	0.319263
TEAD1	ZBTB20	0.318082
ZBTB20	TEAD1	0.318082
ZBTB20	ZSWIM6	0.314308
ZSWIM6	ZBTB20	0.314308
UBN2	ZBTB20	0.313991
ZBTB20	UBN2	0.313991
FGD4	ZBTB20	0.311987
ZBTB20	FGD4	0.311987
ZBTB20	ZDHHC9	0.309949
ZDHHC9	ZBTB20	0.309949
FAM107B	MAP4K4	0.30417
MAP4K4	FAM107B	0.30417
NAV1	ZBTB20	0.301186
ZBTB20	NAV1	0.301186
KRCC1	ZBTB20	0.300344
ZBTB20	KRCC1	0.300344
FAM107B	ZSWIM6	0.299219
ZSWIM6	FAM107B	0.299219
MCMBP	ZBTB20	0.298026
ZBTB20	MCMBP	0.298026
FAR1	ZDHHC9	0.297519
ZDHHC9	FAR1	0.297519
MAP4K4	ZBTB20	0.297217
ZBTB20	MAP4K4	0.297217
FAR1	SNX9	0.29709
SNX9	FAR1	0.29709
FAR1	ZBTB20	0.296516
ZBTB20	FAR1	0.296516
DNAJC15	ZBTB20	0.295711
ZBTB20	DNAJC15	0.295711
FAR1	UBN2	0.294915
UBN2	FAR1	0.294915
FAM107B	TEAD1	0.292815
TEAD1	FAM107B	0.292815
FAM107B	NFIA	0.29216
NFIA	FAM107B	0.29216
FAR1	ZSWIM6	0.291394
ZSWIM6	FAR1	0.291394
STMP1	ZBTB20	0.291344
ZBTB20	STMP1	0.291344
FAR1	RTF2	0.291021
RTF2	FAR1	0.291021
FAM107B	FAR1	0.290078
FAR1	FAM107B	0.290078
DNAJC15	FAM107B	0.289721
FAM107B	DNAJC15	0.289721
FAR1	RBM22	0.289069
RBM22	FAR1	0.289069
FAR1	NUDCD2	0.287528
NUDCD2	FAR1	0.287528
FGD4	ZSWIM6	0.287092
ZSWIM6	FGD4	0.287092
ZDHHC9	ZSWIM6	0.286963
ZSWIM6	ZDHHC9	0.286963
SBDSP1	ZBTB20	0.286739
ZBTB20	SBDSP1	0.286739
DNAJC15	NUDCD2	0.286549
NUDCD2	DNAJC15	0.286549
KLHL5	ZBTB20	0.286517
ZBTB20	KLHL5	0.286517
DNAJC15	FAR1	0.286262
FAR1	DNAJC15	0.286262
TEAD1	UBN2	0.286261
UBN2	TEAD1	0.286261
FAR1	NAV1	0.285673
NAV1	FAR1	0.285673
TEAD1	ZSWIM6	0.28543
ZSWIM6	TEAD1	0.28543
UBN2	ZSWIM6	0.285328
ZSWIM6	UBN2	0.285328
SNX9	ZBTB20	0.284993
ZBTB20	SNX9	0.284993
FGD4	UBN2	0.284429
UBN2	FGD4	0.284429
SBDSP1	UBN2	0.28384
UBN2	SBDSP1	0.28384
NAV1	ZSWIM6	0.28368
ZSWIM6	NAV1	0.28368
DNAJC15	RTF2	0.282922
RTF2	DNAJC15	0.282922
FAM107B	UBN2	0.282818
UBN2	FAM107B	0.282818
DNAJC15	ZDHHC9	0.282714
ZDHHC9	DNAJC15	0.282714
FAM107B	NAV1	0.282627
NAV1	FAM107B	0.282627
TMBIM4	ZBTB20	0.282565
ZBTB20	TMBIM4	0.282565
FAR1	SBDSP1	0.281258
SBDSP1	FAR1	0.281258
DNAJC15	ZSWIM6	0.280738
ZSWIM6	DNAJC15	0.280738
FAR1	TEAD1	0.280139
TEAD1	FAR1	0.280139
NAV1	UBN2	0.278538
UBN2	NAV1	0.278538
RBM22	ZBTB20	0.27808
ZBTB20	RBM22	0.27808
SNX9	ZSWIM6	0.278077
ZSWIM6	SNX9	0.278077
FAM107B	STMP1	0.277963
STMP1	FAM107B	0.277963
MCMBP	UBN2	0.277923
UBN2	MCMBP	0.277923
DNAJC15	SNX9	0.276748
SNX9	DNAJC15	0.276748
FAM107B	RBM22	0.275095
RBM22	FAM107B	0.275095
FAM107B	SNX9	0.275094
SNX9	FAM107B	0.275094
DNAJC15	RBM22	0.274985
RBM22	DNAJC15	0.274985
DNAJC15	STMP1	0.274293
STMP1	DNAJC15	0.274293
DNAJC15	TEAD1	0.27429
TEAD1	DNAJC15	0.27429
ARMC1	FAR1	0.272833
FAR1	ARMC1	0.272833
ARMC1	ZSWIM6	0.272676
ZSWIM6	ARMC1	0.272676
ARMC1	ZBTB20	0.272612
ZBTB20	ARMC1	0.272612
DNAJC15	NAV1	0.272454
NAV1	DNAJC15	0.272454
DNAJC15	KLHL5	0.272276
KLHL5	DNAJC15	0.272276
UBN2	ZDHHC9	0.271866
ZDHHC9	UBN2	0.271866
FAM107B	FGD4	0.271836
FGD4	FAM107B	0.271836
KRCC1	UBN2	0.271795
UBN2	KRCC1	0.271795
SBDSP1	ZSWIM6	0.271445
ZSWIM6	SBDSP1	0.271445
NFIA	ZSWIM6	0.270889
ZSWIM6	NFIA	0.270889
FAR1	STMP1	0.270755
STMP1	FAR1	0.270755
RTF2	ZBTB20	0.270287
ZBTB20	RTF2	0.270287
TEAD1	ZDHHC9	0.270199
ZDHHC9	TEAD1	0.270199
ARMC1	UBN2	0.270195
UBN2	ARMC1	0.270195
DNAJC15	UBN2	0.269673
UBN2	DNAJC15	0.269673
FAM107B	KRCC1	0.269626
KRCC1	FAM107B	0.269626
FAM107B	KLHL5	0.268949
KLHL5	FAM107B	0.268949
CRIPT	DNAJC15	0.268433
DNAJC15	CRIPT	0.268433
FAR1	KRCC1	0.268391
KRCC1	FAR1	0.268391
FAR1	FGD4	0.268253
FGD4	FAR1	0.268253
NUDCD2	RTF2	0.268113
RTF2	NUDCD2	0.268113
RTF2	ZSWIM6	0.267676
ZSWIM6	RTF2	0.267676
NUDCD2	ZBTB20	0.267364
ZBTB20	NUDCD2	0.267364
FAM107B	RTF2	0.267083
RTF2	FAM107B	0.267083
CRIPT	FAR1	0.26666
FAR1	CRIPT	0.26666
STMP1	ZSWIM6	0.266626
ZSWIM6	STMP1	0.266626
KRCC1	TEAD1	0.266124
TEAD1	KRCC1	0.266124
FAM107B	NUDCD2	0.26591
NUDCD2	FAM107B	0.26591
RBM22	ZDHHC9	0.265892
ZDHHC9	RBM22	0.265892
CRIPT	NUDCD2	0.265642
NUDCD2	CRIPT	0.265642
DNAJC15	MAP4K4	0.265273
MAP4K4	DNAJC15	0.265273
MAP4K4	ZSWIM6	0.264999
ZSWIM6	MAP4K4	0.264999
DNAJC15	SBDSP1	0.264989
SBDSP1	DNAJC15	0.264989
FAM107B	SBDSP1	0.26498
SBDSP1	FAM107B	0.26498
FAR1	MCMBP	0.264917
MCMBP	FAR1	0.264917
NUDCD2	ZSWIM6	0.26489
ZSWIM6	NUDCD2	0.26489
DNAJC15	TMBIM4	0.264704
TMBIM4	DNAJC15	0.264704
FAR1	TMBIM4	0.264583
TMBIM4	FAR1	0.264583
MAP4K4	ZDHHC9	0.263831
ZDHHC9	MAP4K4	0.263831
RTF2	SNX9	0.263751
SNX9	RTF2	0.263751
NFIA	TEAD1	0.263436
TEAD1	NFIA	0.263436
SNX9	UBN2	0.263402
UBN2	SNX9	0.263402
FAM107B	TMBIM4	0.262631
TMBIM4	FAM107B	0.262631
RBM22	ZSWIM6	0.262304
ZSWIM6	RBM22	0.262304
KRCC1	ZSWIM6	0.261837
ZSWIM6	KRCC1	0.261837
FGD4	TEAD1	0.261831
TEAD1	FGD4	0.261831
RBM22	UBN2	0.260606
UBN2	RBM22	0.260606
MCMBP	ZSWIM6	0.259868
ZSWIM6	MCMBP	0.259868
FAR1	KLHL5	0.259856
KLHL5	FAR1	0.259856
DNAJC15	FGD4	0.259612
FGD4	DNAJC15	0.259612
KLHL5	ZSWIM6	0.259131
ZSWIM6	KLHL5	0.259131
DNAJC15	NFIA	0.25889
NFIA	DNAJC15	0.25889
MCMBP	TEAD1	0.258723
TEAD1	MCMBP	0.258723
FAR1	MAP4K4	0.258438
MAP4K4	FAR1	0.258438
SBDSP1	TEAD1	0.25832
TEAD1	SBDSP1	0.25832
RBM22	TEAD1	0.258192
TEAD1	RBM22	0.258192
FAM107B	MCMBP	0.257441
MCMBP	FAM107B	0.257441
TMBIM4	ZSWIM6	0.257418
ZSWIM6	TMBIM4	0.257418
DNAJC15	KRCC1	0.257359
KRCC1	DNAJC15	0.257359
KLHL5	UBN2	0.256518
UBN2	KLHL5	0.256518
STMP1	TEAD1	0.256228
TEAD1	STMP1	0.256228
NFIA	UBN2	0.25546
UBN2	NFIA	0.25546
NUDCD2	SNX9	0.25439
SNX9	NUDCD2	0.25439
NFIA	ZDHHC9	0.253749
ZDHHC9	NFIA	0.253749
CRIPT	ZBTB20	0.253337
ZBTB20	CRIPT	0.253337
SNX9	ZDHHC9	0.253077
ZDHHC9	SNX9	0.253077
RTF2	ZDHHC9	0.250598
ZDHHC9	RTF2	0.250598
STMP1	ZDHHC9	0.25016
ZDHHC9	STMP1	0.25016
FAR1	NFIA	0.249678
NFIA	FAR1	0.249678
NAV1	ZDHHC9	0.24963
ZDHHC9	NAV1	0.24963
NAV1	TEAD1	0.249623
TEAD1	NAV1	0.249623
RTF2	UBN2	0.248937
UBN2	RTF2	0.248937
KLHL5	TEAD1	0.248642
TEAD1	KLHL5	0.248642
SNX9	TEAD1	0.248512
TEAD1	SNX9	0.248512
NUDCD2	UBN2	0.248083
UBN2	NUDCD2	0.248083
STMP1	UBN2	0.247281
UBN2	STMP1	0.247281
MAP4K4	UBN2	0.246727
UBN2	MAP4K4	0.246727
NUDCD2	RBM22	0.246121
RBM22	NUDCD2	0.246121
DNAJC15	MCMBP	0.24586
MCMBP	DNAJC15	0.24586
SNX9	TMBIM4	0.245758
TMBIM4	SNX9	0.245758
CRIPT	FAM107B	0.245715
FAM107B	CRIPT	0.245715
ARMC1	DNAJC15	0.244887
DNAJC15	ARMC1	0.244887
ARMC1	FAM107B	0.244834
FAM107B	ARMC1	0.244834
RBM22	SNX9	0.244639
SNX9	RBM22	0.244639
CRIPT	ZSWIM6	0.244587
ZSWIM6	CRIPT	0.244587
NUDCD2	ZDHHC9	0.244279
ZDHHC9	NUDCD2	0.244279
NUDCD2	TMBIM4	0.243187
TMBIM4	NUDCD2	0.243187
MAP4K4	TEAD1	0.241878
TEAD1	MAP4K4	0.241878
SBDSP1	ZDHHC9	0.240517
ZDHHC9	SBDSP1	0.240517
TMBIM4	UBN2	0.240009
UBN2	TMBIM4	0.240009
TMBIM4	ZDHHC9	0.239543
ZDHHC9	TMBIM4	0.239543
TEAD1	TMBIM4	0.239173
TMBIM4	TEAD1	0.239173
FGD4	NAV1	0.237892
NAV1	FGD4	0.237892
KLHL5	NAV1	0.23746
NAV1	KLHL5	0.23746
CRIPT	UBN2	0.236844
UBN2	CRIPT	0.236844
ARMC1	NAV1	0.236006
NAV1	ARMC1	0.236006
KRCC1	ZDHHC9	0.2353
ZDHHC9	KRCC1	0.2353
NUDCD2	TEAD1	0.234913
TEAD1	NUDCD2	0.234913
SNX9	STMP1	0.233483
STMP1	SNX9	0.233483
MAP4K4	NAV1	0.233462
NAV1	MAP4K4	0.233462
CRIPT	SNX9	0.233284
SNX9	CRIPT	0.233284
MCMBP	SBDSP1	0.233141
SBDSP1	MCMBP	0.233141
NUDCD2	STMP1	0.232034
STMP1	NUDCD2	0.232034
RTF2	TEAD1	0.231615
TEAD1	RTF2	0.231615
NAV1	SNX9	0.230939
SNX9	NAV1	0.230939
KLHL5	ZDHHC9	0.230627
ZDHHC9	KLHL5	0.230627
FGD4	ZDHHC9	0.230142
ZDHHC9	FGD4	0.230142
NAV1	NUDCD2	0.23007
NUDCD2	NAV1	0.23007
ARMC1	SBDSP1	0.22972
SBDSP1	ARMC1	0.22972
NAV1	SBDSP1	0.229191
SBDSP1	NAV1	0.229191
MCMBP	ZDHHC9	0.228833
ZDHHC9	MCMBP	0.228833
NAV1	NFIA	0.22866
NFIA	NAV1	0.22866
ARMC1	TEAD1	0.227663
TEAD1	ARMC1	0.227663
MCMBP	SNX9	0.227092
SNX9	MCMBP	0.227092
NAV1	RTF2	0.226783
RTF2	NAV1	0.226783
SBDSP1	SNX9	0.226192
SNX9	SBDSP1	0.226192
RBM22	RTF2	0.225865
RTF2	RBM22	0.225865
RTF2	TMBIM4	0.225611
TMBIM4	RTF2	0.225611
NUDCD2	SBDSP1	0.224418
SBDSP1	NUDCD2	0.224418
CRIPT	TEAD1	0.224212
TEAD1	CRIPT	0.224212
ARMC1	FGD4	0.222476
FGD4	ARMC1	0.222476
FGD4	SBDSP1	0.221501
SBDSP1	FGD4	0.221501
CRIPT	ZDHHC9	0.220846
ZDHHC9	CRIPT	0.220846
ARMC1	SNX9	0.21982
SNX9	ARMC1	0.21982
RBM22	TMBIM4	0.219601
TMBIM4	RBM22	0.219601
KLHL5	NUDCD2	0.219468
NUDCD2	KLHL5	0.219468
KLHL5	SNX9	0.218774
SNX9	KLHL5	0.218774
KRCC1	SBDSP1	0.218297
SBDSP1	KRCC1	0.218297
RBM22	STMP1	0.217801
STMP1	RBM22	0.217801
NAV1	RBM22	0.21704
RBM22	NAV1	0.21704
NAV1	STMP1	0.216915
STMP1	NAV1	0.216915
KRCC1	SNX9	0.215993
SNX9	KRCC1	0.215993
FGD4	SNX9	0.215446
SNX9	FGD4	0.215446
MCMBP	NAV1	0.21475
NAV1	MCMBP	0.21475
KRCC1	NAV1	0.214715
NAV1	KRCC1	0.214715
MAP4K4	SNX9	0.21412
SNX9	MAP4K4	0.21412
ARMC1	NUDCD2	0.212401
NUDCD2	ARMC1	0.212401
MAP4K4	NUDCD2	0.211796
NUDCD2	MAP4K4	0.211796
ARMC1	ZDHHC9	0.211196
ZDHHC9	ARMC1	0.211196
CRIPT	RTF2	0.210985
RTF2	CRIPT	0.210985
CRIPT	NAV1	0.210777
NAV1	CRIPT	0.210777
FGD4	KRCC1	0.210668
KRCC1	FGD4	0.210668
RTF2	SBDSP1	0.209561
SBDSP1	RTF2	0.209561
RBM22	SBDSP1	0.20928
SBDSP1	RBM22	0.20928
NFIA	SNX9	0.208963
SNX9	NFIA	0.208963
MCMBP	NUDCD2	0.208628
NUDCD2	MCMBP	0.208628
KLHL5	MAP4K4	0.20854
MAP4K4	KLHL5	0.20854
KRCC1	NUDCD2	0.20617
NUDCD2	KRCC1	0.20617
CRIPT	RBM22	0.205965
RBM22	CRIPT	0.205965
KRCC1	MCMBP	0.205666
MCMBP	KRCC1	0.205666
CRIPT	SBDSP1	0.205448
SBDSP1	CRIPT	0.205448
NFIA	NUDCD2	0.20528
NUDCD2	NFIA	0.20528
FGD4	NUDCD2	0.20333
NUDCD2	FGD4	0.20333
RTF2	STMP1	0.201622
STMP1	RTF2	0.201622
FGD4	KLHL5	0.201333
KLHL5	FGD4	0.201333
KLHL5	SBDSP1	0.200975
SBDSP1	KLHL5	0.200975
FGD4	MCMBP	0.200741
MCMBP	FGD4	0.200741
NAV1	TMBIM4	0.200723
TMBIM4	NAV1	0.200723
KRCC1	RBM22	0.19994
RBM22	KRCC1	0.19994
ARMC1	MCMBP	0.199617
MCMBP	ARMC1	0.199617
SBDSP1	TMBIM4	0.198477
TMBIM4	SBDSP1	0.198477
NFIA	RBM22	0.196533
RBM22	NFIA	0.196533
MCMBP	RBM22	0.194187
RBM22	MCMBP	0.194187
NFIA	STMP1	0.193675
STMP1	NFIA	0.193675
MAP4K4	RBM22	0.193178
RBM22	MAP4K4	0.193178
FGD4	NFIA	0.19229
NFIA	FGD4	0.19229
KLHL5	KRCC1	0.192125
KRCC1	KLHL5	0.192125
MAP4K4	NFIA	0.19199
NFIA	MAP4K4	0.19199
KLHL5	RBM22	0.191631
RBM22	KLHL5	0.191631
MCMBP	TMBIM4	0.190435
TMBIM4	MCMBP	0.190435
SBDSP1	STMP1	0.190336
STMP1	SBDSP1	0.190336
MAP4K4	SBDSP1	0.188773
SBDSP1	MAP4K4	0.188773
STMP1	TMBIM4	0.187962
TMBIM4	STMP1	0.187962
CRIPT	TMBIM4	0.187507
TMBIM4	CRIPT	0.187507
FGD4	MAP4K4	0.186646
MAP4K4	FGD4	0.186646
ARMC1	KRCC1	0.185595
KRCC1	ARMC1	0.185595
MCMBP	RTF2	0.185249
RTF2	MCMBP	0.185249
KLHL5	NFIA	0.184991
NFIA	KLHL5	0.184991
ARMC1	RTF2	0.183504
RTF2	ARMC1	0.183504
NFIA	SBDSP1	0.182987
SBDSP1	NFIA	0.182987
FGD4	RBM22	0.182805
RBM22	FGD4	0.182805
MCMBP	NFIA	0.182402
NFIA	MCMBP	0.182402
KLHL5	MCMBP	0.181635
MCMBP	KLHL5	0.181635
MCMBP	STMP1	0.180831
STMP1	MCMBP	0.180831
CRIPT	MCMBP	0.180685
MCMBP	CRIPT	0.180685
KLHL5	RTF2	0.17992
RTF2	KLHL5	0.17992
KRCC1	NFIA	0.179781
NFIA	KRCC1	0.179781
KRCC1	MAP4K4	0.179723
MAP4K4	KRCC1	0.179723
KRCC1	STMP1	0.178179
STMP1	KRCC1	0.178179
MAP4K4	MCMBP	0.177918
MCMBP	MAP4K4	0.177918
MAP4K4	RTF2	0.17753
RTF2	MAP4K4	0.17753
KLHL5	STMP1	0.177022
STMP1	KLHL5	0.177022
KRCC1	TMBIM4	0.17666
TMBIM4	KRCC1	0.17666
FGD4	STMP1	0.176476
STMP1	FGD4	0.176476
MAP4K4	STMP1	0.175944
STMP1	MAP4K4	0.175944
FGD4	RTF2	0.175706
RTF2	FGD4	0.175706
ARMC1	KLHL5	0.175507
KLHL5	ARMC1	0.175507
CRIPT	KRCC1	0.175411
KRCC1	CRIPT	0.175411
CRIPT	FGD4	0.174376
FGD4	CRIPT	0.174376
KRCC1	RTF2	0.174299
RTF2	KRCC1	0.174299
NFIA	RTF2	0.173912
RTF2	NFIA	0.173912
ARMC1	RBM22	0.173075
RBM22	ARMC1	0.173075
CRIPT	STMP1	0.172708
STMP1	CRIPT	0.172708
CRIPT	KLHL5	0.17239
KLHL5	CRIPT	0.17239
NFIA	TMBIM4	0.172022
TMBIM4	NFIA	0.172022
FGD4	TMBIM4	0.171329
TMBIM4	FGD4	0.171329

[truncated: 2 more sheets: darkgrey.proAD.edges, darkgrey.defAD.edges]
