# Supplementary material for: Tau mediates the reshaping of the transcriptional landscape toward intermediate Alzheimer’s disease stages
Source: Front Cell Dev Biol. 2025 Jan 3;12:1459573. doi: 10.3389/fcell.2024.1459573 (PMC11739074; doi:10.3389/fcell.2024.1459573)
Supplement: Supplementary file 12 [file Table7.xlsx]

## Sheet: Pink module GO
source	term_name	term_id	adjusted_p_value	negative_log10_of_adjusted_p_value	term_size	query_size	intersection_size	effective_domain_size	intersections
GO:MF	molecular_function	GO:0003674	3.17507e-43	42.4982	20171	121	113	62649	PARP9,IL18BP,PARP14,NLRC5,GBP1,GBP2,GBP3,CALHM6,SAMD9L,TAP2,XAF1,DTX3L,DDX58,RSAD2,IFIT2,ZC3HAV1,HLA-DOA,IFIT3,TNFSF13B,CMPK2,BATF2,CTSS,SAMD9,OAS2,GIMAP2,DDX60L,IRF1,ZNFX1,SYTL1,HCST,METTL7B,SAMHD1,TRIM25,RNF213,DOK3,STAT2,TRIM56,GBP4,C1QC,GBP5,HELZ2,MS4A7,HAVCR2,SP110,FGL2,MS4A6A,GIMAP6,PIK3AP1,APBB1IP,LPAR5,PARP10,CXCL16,C4A,MOV10,FERMT3,CALCOCO2,VMP1,MAFB,PTAFR,FYB1,PPP1R18,AGTRAP,VSIR,GIMAP8…
GO:MF	binding	GO:0005488	6.04172e-40	39.2188	18286	121	107	62649	PARP9,IL18BP,PARP14,NLRC5,GBP1,GBP2,GBP3,CALHM6,SAMD9L,TAP2,XAF1,DTX3L,DDX58,RSAD2,IFIT2,ZC3HAV1,HLA-DOA,IFIT3,TNFSF13B,CMPK2,BATF2,CTSS,SAMD9,OAS2,GIMAP2,DDX60L,IRF1,ZNFX1,SYTL1,HCST,SAMHD1,TRIM25,RNF213,DOK3,STAT2,TRIM56,GBP4,C1QC,GBP5,HELZ2,MS4A7,HAVCR2,SP110,FGL2,MS4A6A,GIMAP6,PIK3AP1,APBB1IP,PARP10,CXCL16,C4A,MOV10,FERMT3,CALCOCO2,VMP1,MAFB,PTAFR,FYB1,PPP1R18,AGTRAP,VSIR,GIMAP8,RCSD1,ADAP2,S…
GO:MF	protein binding	GO:0005515	3.04491e-37	36.5164	14778	119	96	62649	PARP9,IL18BP,PARP14,NLRC5,GBP1,GBP2,GBP3,CALHM6,SAMD9L,TAP2,XAF1,DTX3L,DDX58,RSAD2,IFIT2,ZC3HAV1,HLA-DOA,IFIT3,TNFSF13B,BATF2,CTSS,SAMD9,OAS2,GIMAP2,IRF1,SYTL1,HCST,SAMHD1,TRIM25,DOK3,STAT2,TRIM56,GBP4,C1QC,GBP5,HELZ2,MS4A7,HAVCR2,FGL2,MS4A6A,PIK3AP1,APBB1IP,PARP10,CXCL16,C4A,MOV10,FERMT3,CALCOCO2,VMP1,MAFB,PTAFR,FYB1,PPP1R18,AGTRAP,VSIR,RCSD1,ADAP2,SLFN11,S1PR3,CKLF,EFCAB2,CCDC167,ARHGAP18,IL17R…
GO:MF	ion binding	GO:0043167	4.9149e-18	17.3085	6079	121	50	62649	PARP9,NLRC5,GBP1,GBP2,GBP3,TAP2,XAF1,DTX3L,DDX58,RSAD2,ZC3HAV1,CMPK2,OAS2,GIMAP2,DDX60L,ZNFX1,SAMHD1,TRIM25,RNF213,TRIM56,GBP4,GBP5,HELZ2,HAVCR2,SP110,GIMAP6,MOV10,CALCOCO2,GIMAP8,ADAP2,SLFN11,EFCAB2,TRIM69,MOB3C,ADAMTS2,GIMAP7,SYK,S100A16,ACSL5,CAPS,RAB27A,ANGPT2,EHD4,IKZF1,CP,PDCD2,MKNK2,TNFRSF11A,COL27A1,ARSD
GO:MF	carbohydrate derivative binding	GO:0097367	1.08218e-13	12.9657	2300	107	27	62649	PARP9,NLRC5,GBP1,GBP2,GBP3,TAP2,DDX58,CMPK2,CTSS,OAS2,GIMAP2,DDX60L,SAMHD1,RNF213,GBP4,GBP5,HELZ2,GIMAP6,MOV10,PTAFR,GIMAP8,SLFN11,GIMAP7,SYK,ACSL5,RAB27A,EHD4
GO:MF	purine ribonucleoside triphosphate binding	GO:0035639	3.74043e-13	12.4271	1848	116	25	62649	NLRC5,GBP1,GBP2,GBP3,TAP2,DDX58,CMPK2,OAS2,GIMAP2,DDX60L,SAMHD1,RNF213,GBP4,GBP5,HELZ2,GIMAP6,MOV10,GIMAP8,SLFN11,GIMAP7,SYK,ACSL5,RAB27A,EHD4,MKNK2
GO:MF	purine ribonucleotide binding	GO:0032555	7.30466e-13	12.1364	1917	116	25	62649	NLRC5,GBP1,GBP2,GBP3,TAP2,DDX58,CMPK2,OAS2,GIMAP2,DDX60L,SAMHD1,RNF213,GBP4,GBP5,HELZ2,GIMAP6,MOV10,GIMAP8,SLFN11,GIMAP7,SYK,ACSL5,RAB27A,EHD4,MKNK2
GO:MF	ribonucleotide binding	GO:0032553	7.78905e-13	12.1085	1934	116	25	62649	NLRC5,GBP1,GBP2,GBP3,TAP2,DDX58,CMPK2,OAS2,GIMAP2,DDX60L,SAMHD1,RNF213,GBP4,GBP5,HELZ2,GIMAP6,MOV10,GIMAP8,SLFN11,GIMAP7,SYK,ACSL5,RAB27A,EHD4,MKNK2
GO:MF	anion binding	GO:0043168	1.64856e-12	11.7829	2426	107	26	62649	PARP9,NLRC5,GBP1,GBP2,GBP3,TAP2,DDX58,CMPK2,OAS2,GIMAP2,DDX60L,SAMHD1,RNF213,GBP4,GBP5,HELZ2,GIMAP6,MOV10,GIMAP8,ADAP2,SLFN11,GIMAP7,SYK,ACSL5,RAB27A,EHD4
GO:MF	purine nucleotide binding	GO:0017076	1.64856e-12	11.7829	2020	116	25	62649	NLRC5,GBP1,GBP2,GBP3,TAP2,DDX58,CMPK2,OAS2,GIMAP2,DDX60L,SAMHD1,RNF213,GBP4,GBP5,HELZ2,GIMAP6,MOV10,GIMAP8,SLFN11,GIMAP7,SYK,ACSL5,RAB27A,EHD4,MKNK2
GO:MF	GTP binding	GO:0005525	5.49913e-12	11.2597	385	107	13	62649	GBP1,GBP2,GBP3,DDX58,GIMAP2,SAMHD1,GBP4,GBP5,GIMAP6,GIMAP8,GIMAP7,RAB27A,EHD4
GO:MF	nucleoside phosphate binding	GO:1901265	6.76826e-12	11.1695	2179	116	25	62649	NLRC5,GBP1,GBP2,GBP3,TAP2,DDX58,CMPK2,OAS2,GIMAP2,DDX60L,SAMHD1,RNF213,GBP4,GBP5,HELZ2,GIMAP6,MOV10,GIMAP8,SLFN11,GIMAP7,SYK,ACSL5,RAB27A,EHD4,MKNK2
GO:MF	nucleotide binding	GO:0000166	6.76826e-12	11.1695	2178	116	25	62649	NLRC5,GBP1,GBP2,GBP3,TAP2,DDX58,CMPK2,OAS2,GIMAP2,DDX60L,SAMHD1,RNF213,GBP4,GBP5,HELZ2,GIMAP6,MOV10,GIMAP8,SLFN11,GIMAP7,SYK,ACSL5,RAB27A,EHD4,MKNK2
GO:MF	guanyl ribonucleotide binding	GO:0032561	8.14385e-12	11.0892	407	107	13	62649	GBP1,GBP2,GBP3,DDX58,GIMAP2,SAMHD1,GBP4,GBP5,GIMAP6,GIMAP8,GIMAP7,RAB27A,EHD4
GO:MF	guanyl nucleotide binding	GO:0019001	8.14385e-12	11.0892	407	107	13	62649	GBP1,GBP2,GBP3,DDX58,GIMAP2,SAMHD1,GBP4,GBP5,GIMAP6,GIMAP8,GIMAP7,RAB27A,EHD4
GO:MF	heterocyclic compound binding	GO:1901363	1.27293e-11	10.8952	7463	43	25	62649	PARP9,NLRC5,GBP1,GBP2,GBP3,TAP2,DDX58,IFIT2,ZC3HAV1,IFIT3,CMPK2,BATF2,OAS2,GIMAP2,DDX60L,IRF1,ZNFX1,SAMHD1,TRIM25,RNF213,STAT2,TRIM56,GBP4,GBP5,HELZ2
GO:MF	organic cyclic compound binding	GO:0097159	1.49441e-11	10.8255	7536	43	25	62649	PARP9,NLRC5,GBP1,GBP2,GBP3,TAP2,DDX58,IFIT2,ZC3HAV1,IFIT3,CMPK2,BATF2,OAS2,GIMAP2,DDX60L,IRF1,ZNFX1,SAMHD1,TRIM25,RNF213,STAT2,TRIM56,GBP4,GBP5,HELZ2
GO:MF	small molecule binding	GO:0036094	1.77319e-11	10.7512	2527	116	26	62649	NLRC5,GBP1,GBP2,GBP3,TAP2,DDX58,CMPK2,OAS2,GIMAP2,DDX60L,SAMHD1,RNF213,GBP4,GBP5,HELZ2,GIMAP6,MOV10,GIMAP8,ADAP2,SLFN11,GIMAP7,SYK,ACSL5,RAB27A,EHD4,MKNK2
GO:MF	catalytic activity	GO:0003824	3.72727e-11	10.4286	5691	43	22	62649	PARP9,PARP14,GBP1,GBP2,GBP3,DTX3L,DDX58,RSAD2,ZC3HAV1,CMPK2,CTSS,OAS2,DDX60L,ZNFX1,METTL7B,SAMHD1,TRIM25,RNF213,TRIM56,GBP4,GBP5,HELZ2
GO:MF	signaling receptor binding	GO:0005102	2.6977e-10	9.56901	1556	105	19	62649	IL18BP,TAP2,TNFSF13B,SYTL1,HCST,TRIM25,FGL2,PIK3AP1,CXCL16,FERMT3,FYB1,S1PR3,CKLF,IL17RA,IL6R,SYK,METRNL,OSMR,ANGPT2
GO:MF	metal ion binding	GO:0046872	3.59886e-10	9.44383	4275	121	32	62649	TAP2,XAF1,DTX3L,DDX58,RSAD2,ZC3HAV1,OAS2,ZNFX1,SAMHD1,TRIM25,RNF213,TRIM56,HELZ2,HAVCR2,SP110,CALCOCO2,ADAP2,EFCAB2,TRIM69,MOB3C,ADAMTS2,S100A16,CAPS,ANGPT2,EHD4,IKZF1,CP,PDCD2,MKNK2,TNFRSF11A,COL27A1,ARSD
GO:MF	cation binding	GO:0043169	5.98274e-10	9.2231	4368	121	32	62649	TAP2,XAF1,DTX3L,DDX58,RSAD2,ZC3HAV1,OAS2,ZNFX1,SAMHD1,TRIM25,RNF213,TRIM56,HELZ2,HAVCR2,SP110,CALCOCO2,ADAP2,EFCAB2,TRIM69,MOB3C,ADAMTS2,S100A16,CAPS,ANGPT2,EHD4,IKZF1,CP,PDCD2,MKNK2,TNFRSF11A,COL27A1,ARSD
GO:MF	identical protein binding	GO:0042802	6.77044e-10	9.16938	2086	95	20	62649	GBP1,GBP2,GBP3,DDX58,IFIT3,GIMAP2,SAMHD1,STAT2,GBP4,GBP5,PIK3AP1,CALCOCO2,MAFB,AGTRAP,VSIR,TRIM69,IL6R,GIMAP7,SMIM3,S100A16
GO:MF	ribonucleoside triphosphate phosphatase activity	GO:0017111	2.23041e-08	7.65162	668	104	12	62649	GBP1,GBP2,GBP3,DDX58,DDX60L,RNF213,GBP4,GBP5,MOV10,SLFN11,GIMAP7,RAB27A
GO:MF	hydrolase activity, acting on acid anhydrides	GO:0016817	5.41233e-08	7.26662	731	104	12	62649	GBP1,GBP2,GBP3,DDX58,DDX60L,RNF213,GBP4,GBP5,MOV10,SLFN11,GIMAP7,RAB27A
GO:MF	pyrophosphatase activity	GO:0016462	5.41233e-08	7.26662	730	104	12	62649	GBP1,GBP2,GBP3,DDX58,DDX60L,RNF213,GBP4,GBP5,MOV10,SLFN11,GIMAP7,RAB27A
GO:MF	hydrolase activity, acting on acid anhydrides, in phosphorus-containing anhydrides	GO:0016818	5.41233e-08	7.26662	731	104	12	62649	GBP1,GBP2,GBP3,DDX58,DDX60L,RNF213,GBP4,GBP5,MOV10,SLFN11,GIMAP7,RAB27A
GO:MF	NAD+ ADP-ribosyltransferase activity	GO:0003950	7.12656e-08	7.14712	24	54	4	62649	PARP9,PARP14,ZC3HAV1,PARP10
GO:MF	pentosyltransferase activity	GO:0016763	4.76632e-07	6.32182	52	110	5	62649	PARP9,PARP14,ZC3HAV1,PARP10,KDELC2
GO:MF	helicase activity	GO:0004386	4.76632e-07	6.32182	159	73	6	62649	DDX58,DDX60L,ZNFX1,HELZ2,MOV10,SLFN11
GO:MF	hydrolase activity	GO:0016787	2.08799e-06	5.68027	2413	86	16	62649	GBP1,GBP2,GBP3,DDX58,CTSS,DDX60L,SAMHD1,RNF213,GBP4,GBP5,HELZ2,FGL2,MOV10,SLFN11,ADAMTS2,GIMAP7
GO:MF	ATP-dependent activity	GO:0140657	3.35037e-06	5.47491	563	98	9	62649	TAP2,DDX58,DDX60L,ZNFX1,RNF213,HELZ2,MOV10,SLFN11,ACSL5
GO:MF	cytokine binding	GO:0019955	4.10171e-06	5.38704	145	117	6	62649	IL18BP,GBP1,IL6R,OSMR,NRROS,TNFRSF11A
GO:MF	NAD+-protein ADP-ribosyltransferase activity	GO:1990404	4.38997e-06	5.35754	23	3	2	62649	PARP9,PARP14
GO:MF	molecular function regulator activity	GO:0098772	5.44577e-06	5.26394	2006	124	17	62649	PARP9,IL18BP,DTX3L,TNFSF13B,CXCL16,C4A,VSIR,ADAP2,CKLF,ARHGAP18,MOB3C,ARHGAP27,METRNL,RAB27A,KCNE3,FXYD5,SOCS3
GO:MF	nucleic acid binding	GO:0003676	6.61514e-06	5.17946	5483	61	19	62649	NLRC5,DDX58,IFIT2,ZC3HAV1,IFIT3,BATF2,OAS2,DDX60L,IRF1,ZNFX1,SAMHD1,TRIM25,STAT2,TRIM56,HELZ2,SP110,PARP10,MOV10,MAFB
GO:MF	RNA helicase activity	GO:0003724	7.846e-06	5.10535	76	57	4	62649	DDX58,DDX60L,HELZ2,MOV10
GO:MF	ATP binding	GO:0005524	8.12212e-06	5.09033	1500	116	14	62649	NLRC5,TAP2,DDX58,CMPK2,OAS2,DDX60L,RNF213,HELZ2,MOV10,SLFN11,SYK,ACSL5,EHD4,MKNK2
GO:MF	ATP-dependent activity, acting on RNA	GO:0008186	8.26473e-06	5.08277	78	57	4	62649	DDX58,DDX60L,HELZ2,MOV10
GO:MF	transferase activity	GO:0016740	1.17844e-05	4.92869	2340	39	10	62649	PARP9,PARP14,DTX3L,ZC3HAV1,CMPK2,OAS2,METTL7B,TRIM25,RNF213,TRIM56
GO:MF	adenyl ribonucleotide binding	GO:0032559	1.19872e-05	4.92128	1563	116	14	62649	NLRC5,TAP2,DDX58,CMPK2,OAS2,DDX60L,RNF213,HELZ2,MOV10,SLFN11,SYK,ACSL5,EHD4,MKNK2
GO:MF	protein homodimerization activity	GO:0042803	1.19872e-05	4.92128	701	95	9	62649	GBP1,GBP2,GBP3,GBP4,GBP5,CALCOCO2,IL6R,GIMAP7,S100A16
GO:MF	enzyme binding	GO:0019899	1.2327e-05	4.90914	2082	115	16	62649	PARP9,PARP14,GBP1,DTX3L,DDX58,SYTL1,STAT2,PTAFR,PPP1R18,VSIR,IL6R,SYK,PRAM1,ANGPT2,PDCD2,BCOR
GO:MF	cell adhesion molecule binding	GO:0050839	1.2327e-05	4.90914	561	119	9	62649	ZC3HAV1,TRIM25,FERMT3,S1PR3,ARHGAP18,SYK,EMB,EHD4,FXYD5
GO:MF	GTPase activity	GO:0003924	1.31879e-05	4.87982	333	104	7	62649	GBP1,GBP2,GBP3,GBP4,GBP5,GIMAP7,RAB27A
GO:MF	STAT family protein binding	GO:0097677	1.5507e-05	4.80947	11	12	2	62649	PARP9,DTX3L
GO:MF	adenyl nucleotide binding	GO:0030554	2.19438e-05	4.65869	1664	116	14	62649	NLRC5,TAP2,DDX58,CMPK2,OAS2,DDX60L,RNF213,HELZ2,MOV10,SLFN11,SYK,ACSL5,EHD4,MKNK2
GO:MF	double-stranded RNA binding	GO:0003725	3.95138e-05	4.40325	76	27	3	62649	DDX58,OAS2,DDX60L
GO:MF	cytokine receptor binding	GO:0005126	4.59577e-05	4.33764	276	100	6	62649	TNFSF13B,CXCL16,CKLF,IL6R,SYK,OSMR
GO:MF	RNA binding	GO:0003723	4.66441e-05	4.3312	3122	43	11	62649	DDX58,IFIT2,ZC3HAV1,IFIT3,OAS2,DDX60L,ZNFX1,SAMHD1,TRIM25,TRIM56,HELZ2
GO:MF	catalytic activity, acting on a nucleic acid	GO:0140640	5.79191e-05	4.23718	612	73	7	62649	DDX58,DDX60L,ZNFX1,SAMHD1,HELZ2,MOV10,SLFN11
GO:MF	nucleotidyltransferase activity	GO:0016779	6.57561e-05	4.18206	149	54	4	62649	PARP9,PARP14,OAS2,PARP10
GO:MF	protein-containing complex binding	GO:0044877	0.000100737	3.99681	1304	87	10	62649	GBP1,HLA-DOA,CTSS,C4A,FERMT3,MAFB,FYB1,RCSD1,S1PR3,SYK
GO:MF	NAD+-protein-C-terminal glycine ADP-ribosyltransferase activity	GO:0140802	0.000113205	3.94613	1	1	1	62649	PARP9
GO:MF	transcription regulator activity	GO:0140110	0.000113205	3.94613	1929	61	10	62649	PARP9,PARP14,BATF2,IRF1,TRIM25,STAT2,HELZ2,SP110,PARP10,MAFB
GO:MF	molecular transducer activity	GO:0060089	0.000162745	3.78849	1489	117	12	62649	HLA-DOA,LPAR5,PTAFR,AGTRAP,S1PR3,IL17RA,IL6R,GPC6,TMIGD3,OSMR,PEAR1,TNFRSF11A
GO:MF	signaling receptor activity	GO:0038023	0.000162745	3.78849	1489	117	12	62649	HLA-DOA,LPAR5,PTAFR,AGTRAP,S1PR3,IL17RA,IL6R,GPC6,TMIGD3,OSMR,PEAR1,TNFRSF11A
GO:MF	transcription corepressor activity	GO:0003714	0.00018812	3.72557	193	3	2	62649	PARP9,PARP14
GO:MF	catalytic activity, acting on RNA	GO:0140098	0.000208193	3.68153	397	57	5	62649	DDX58,DDX60L,SAMHD1,HELZ2,MOV10
GO:MF	ubiquitin-like protein ligase binding	GO:0044389	0.000223167	3.65137	315	13	3	62649	PARP9,DTX3L,DDX58
GO:MF	glycosyltransferase activity	GO:0016757	0.000270629	3.56763	272	16	3	62649	PARP9,PARP14,ZC3HAV1
GO:MF	protein dimerization activity	GO:0046983	0.000270629	3.56763	1088	95	9	62649	GBP1,GBP2,GBP3,GBP4,GBP5,CALCOCO2,IL6R,GIMAP7,S100A16
GO:MF	ATP hydrolysis activity	GO:0016887	0.000289388	3.53852	336	73	5	62649	DDX58,DDX60L,RNF213,MOV10,SLFN11
GO:MF	ADP-D-ribose binding	GO:0072570	0.000289388	3.53852	3	1	1	62649	PARP9
GO:MF	ubiquitin protein ligase activity	GO:0061630	0.000311798	3.50613	328	39	4	62649	DTX3L,TRIM25,RNF213,TRIM56
GO:MF	ubiquitin-like protein ligase activity	GO:0061659	0.000352874	3.45238	340	39	4	62649	DTX3L,TRIM25,RNF213,TRIM56
GO:MF	interleukin-18 binding	GO:0042007	0.000367837	3.43435	2	2	1	62649	IL18BP
GO:MF	ciliary neurotrophic factor receptor activity	GO:0004897	0.000398412	3.39967	8	100	2	62649	IL6R,OSMR
GO:MF	immune receptor activity	GO:0140375	0.000468673	3.32913	142	100	4	62649	HLA-DOA,IL17RA,IL6R,OSMR
GO:MF	transcription coregulator activity	GO:0003712	0.000486337	3.31306	521	54	5	62649	PARP9,PARP14,TRIM25,HELZ2,PARP10
GO:MF	catalytic activity, acting on a protein	GO:0140096	0.000505453	3.29632	2335	87	12	62649	PARP9,PARP14,DTX3L,CTSS,TRIM25,RNF213,TRIM56,FGL2,PARP10,TRIM69,ADAMTS2,SYK
GO:MF	molecular function inhibitor activity	GO:0140678	0.000715007	3.14569	724	2	2	62649	PARP9,IL18BP
GO:MF	transmembrane signaling receptor activity	GO:0004888	0.000758021	3.12032	1271	117	10	62649	HLA-DOA,LPAR5,PTAFR,AGTRAP,S1PR3,IL17RA,IL6R,TMIGD3,OSMR,TNFRSF11A
GO:MF	tapasin binding	GO:0046980	0.00083261	3.07956	1	10	1	62649	TAP2
GO:MF	ubiquitin-protein transferase activity	GO:0004842	0.00085433	3.06837	444	39	4	62649	DTX3L,TRIM25,RNF213,TRIM56
GO:MF	zinc ion binding	GO:0008270	0.00085433	3.06837	837	39	5	62649	XAF1,DDX58,ZNFX1,SAMHD1,TRIM56
GO:MF	ubiquitin-like protein transferase activity	GO:0019787	0.00103394	2.9855	470	39	4	62649	DTX3L,TRIM25,RNF213,TRIM56
GO:MF	molecular function activator activity	GO:0140677	0.00103394	2.9855	1284	99	9	62649	TNFSF13B,CXCL16,VSIR,ADAP2,CKLF,ARHGAP18,MOB3C,ARHGAP27,METRNL
GO:MF	phosphatidylinositol 3-kinase binding	GO:0043548	0.00136091	2.86617	30	51	2	62649	HCST,PIK3AP1
GO:MF	peptide transmembrane transporter activity	GO:1904680	0.00200181	2.69858	16	118	2	62649	TAP2,DISP1
GO:MF	enzyme regulator activity	GO:0030234	0.0021358	2.67044	1264	89	8	62649	PARP9,DTX3L,C4A,VSIR,ADAP2,ARHGAP18,MOB3C,ARHGAP27
GO:MF	cadherin binding	GO:0045296	0.00218678	2.66019	334	119	5	62649	ZC3HAV1,TRIM25,ARHGAP18,EHD4,FXYD5
GO:MF	triphosphoric monoester hydrolase activity	GO:0016793	0.00231049	2.6363	1	33	1	62649	SAMHD1
GO:MF	thiol S-methyltransferase activity	GO:0018708	0.00231049	2.6363	1	32	1	62649	METTL7B
GO:MF	dGTPase activity	GO:0008832	0.00231049	2.6363	1	33	1	62649	SAMHD1
GO:MF	guanyl deoxyribonucleotide binding	GO:0032560	0.00231049	2.6363	1	33	1	62649	SAMHD1
GO:MF	dGTP binding	GO:0032567	0.00231049	2.6363	1	33	1	62649	SAMHD1
GO:MF	deoxynucleoside triphosphate hydrolase activity	GO:0106375	0.00231049	2.6363	1	33	1	62649	SAMHD1
GO:MF	DNA binding	GO:0003677	0.002311	2.6362	2526	47	8	62649	NLRC5,DDX58,BATF2,IRF1,SAMHD1,STAT2,HELZ2,SP110
GO:MF	transferase activity, transferring phosphorus-containing groups	GO:0016772	0.00236352	2.62644	967	25	4	62649	PARP9,PARP14,CMPK2,OAS2
GO:MF	protein ADP-ribosyltransferase-substrate adaptor activity	GO:0140768	0.00241052	2.61789	3	12	1	62649	DTX3L
GO:MF	cytokine receptor activity	GO:0004896	0.00241052	2.61789	100	100	3	62649	IL17RA,IL6R,OSMR
GO:MF	single-stranded RNA binding	GO:0003727	0.00249263	2.60334	86	27	2	62649	DDX58,DDX60L
GO:MF	receptor antagonist activity	GO:0048019	0.00249263	2.60334	19	2	1	62649	IL18BP
GO:MF	thymidylate kinase activity	GO:0004798	0.00249263	2.60334	2	20	1	62649	CMPK2
GO:MF	transition metal ion binding	GO:0046914	0.00249263	2.60334	1115	39	5	62649	XAF1,DDX58,ZNFX1,SAMHD1,TRIM56
GO:MF	CMP kinase activity	GO:0036430	0.00249263	2.60334	2	20	1	62649	CMPK2
GO:MF	dCMP kinase activity	GO:0036431	0.00249263	2.60334	2	20	1	62649	CMPK2
GO:MF	UMP kinase activity	GO:0033862	0.00249263	2.60334	2	20	1	62649	CMPK2
GO:MF	ABC-type peptide transporter activity	GO:0015440	0.00304928	2.5158	5	10	1	62649	TAP2
GO:MF	ABC-type peptide antigen transporter activity	GO:0015433	0.00304928	2.5158	5	10	1	62649	TAP2
GO:MF	TAP1 binding	GO:0046978	0.00351993	2.45347	6	10	1	62649	TAP2
GO:MF	MHC class Ib protein binding	GO:0023029	0.00351993	2.45347	6	10	1	62649	TAP2
GO:MF	uridylate kinase activity	GO:0009041	0.00351993	2.45347	3	20	1	62649	CMPK2
GO:MF	signaling receptor inhibitor activity	GO:0030547	0.00351993	2.45347	30	2	1	62649	IL18BP
GO:MF	histone binding	GO:0042393	0.00392097	2.40661	257	12	2	62649	PARP9,DTX3L
GO:MF	deoxynucleotide transmembrane transporter activity	GO:0030233	0.00443384	2.35322	1	77	1	62649	SLC25A19
GO:MF	lipid binding	GO:0008289	0.00446426	2.35025	825	90	6	62649	FERMT3,PTAFR,FYB1,ADAP2,S1PR3,PRAM1
GO:MF	cytidylate kinase activity	GO:0004127	0.00452001	2.34486	4	20	1	62649	CMPK2
GO:MF	enzyme activator activity	GO:0008047	0.00456597	2.34047	566	89	5	62649	VSIR,ADAP2,ARHGAP18,MOB3C,ARHGAP27
GO:MF	ciliary neurotrophic factor binding	GO:0070119	0.00456597	2.34047	1	83	1	62649	IL6R
GO:MF	growth factor binding	GO:0019838	0.00456597	2.34047	132	101	3	62649	IL6R,OSMR,NRROS
GO:MF	interleukin-15 receptor binding	GO:0016170	0.00474366	2.32389	1	87	1	62649	SYK
GO:MF	integrin binding	GO:0005178	0.00481913	2.31703	158	87	3	62649	FERMT3,S1PR3,SYK
GO:MF	TAP binding	GO:0046977	0.00481913	2.31703	9	10	1	62649	TAP2
GO:MF	purine deoxyribonucleotide binding	GO:0032554	0.00525568	2.27937	3	33	1	62649	SAMHD1
GO:MF	2'-5'-oligoadenylate synthetase activity	GO:0001730	0.00526305	2.27876	4	25	1	62649	OAS2
GO:MF	RIG-I binding	GO:0039552	0.00532307	2.27384	3	34	1	62649	TRIM25
GO:MF	chemokine activity	GO:0008009	0.00555701	2.25516	50	76	2	62649	CXCL16,CKLF
GO:MF	signaling receptor regulator activity	GO:0030545	0.00566078	2.24712	543	99	5	62649	IL18BP,TNFSF13B,CXCL16,CKLF,METRNL
GO:MF	5'-3' RNA helicase activity	GO:0032574	0.00580228	2.2364	2	57	1	62649	MOV10
GO:MF	RNA polymerase II-specific DNA-binding transcription factor binding	GO:0061629	0.00640417	2.19354	354	12	2	62649	PARP9,DTX3L
GO:MF	spectrin binding	GO:0030507	0.00650676	2.18664	26	5	1	62649	GBP1
GO:MF	deoxyribonucleotide binding	GO:0032552	0.00655379	2.18351	4	33	1	62649	SAMHD1
GO:MF	MHC class II receptor activity	GO:0032395	0.00669752	2.17409	8	17	1	62649	HLA-DOA
GO:MF	amide transmembrane transporter activity	GO:0042887	0.00687397	2.16279	37	118	2	62649	TAP2,DISP1
GO:MF	thiamine pyrophosphate transmembrane transporter activity	GO:0090422	0.00746666	2.12687	2	77	1	62649	SLC25A19
GO:MF	enzyme inhibitor activity	GO:0004857	0.00764424	2.11667	397	12	2	62649	PARP9,DTX3L
GO:MF	interleukin-6 receptor activity	GO:0004915	0.00786237	2.10445	2	83	1	62649	IL6R
GO:MF	interleukin-6 binding	GO:0019981	0.00786237	2.10445	2	83	1	62649	IL6R
GO:MF	platelet activating factor receptor activity	GO:0004992	0.00873961	2.05851	3	62	1	62649	PTAFR
GO:MF	cytokine activity	GO:0005125	0.00896611	2.0474	237	76	3	62649	TNFSF13B,CXCL16,CKLF
GO:MF	double-stranded DNA binding	GO:0003690	0.00921556	2.03548	1663	38	5	62649	NLRC5,DDX58,BATF2,IRF1,STAT2
GO:MF	MHC class I protein binding	GO:0042288	0.00964193	2.01584	21	10	1	62649	TAP2
GO:MF	ribonuclease activity	GO:0004540	0.00966498	2.0148	125	43	2	62649	SAMHD1,HELZ2
GO:MF	chemokine receptor binding	GO:0042379	0.00997207	2.00121	72	76	2	62649	CXCL16,CKLF
GO:MF	Hsp90 protein binding	GO:0051879	0.0101047	1.99547	45	5	1	62649	GBP1
GO:MF	DNA-binding transcription factor binding	GO:0140297	0.0103621	1.98455	482	12	2	62649	PARP9,DTX3L
GO:MF	phosphotyrosine residue binding	GO:0001784	0.0105505	1.97673	46	124	2	62649	SYK,SOCS3
GO:MF	interleukin-11 receptor activity	GO:0004921	0.0108664	1.96392	3	83	1	62649	IL6R
GO:MF	interleukin-11 binding	GO:0019970	0.0108664	1.96392	3	83	1	62649	IL6R
GO:MF	angiotensin type II receptor activity	GO:0004945	0.0111852	1.95136	4	65	1	62649	AGTRAP
GO:MF	angiotensin receptor activity	GO:0001595	0.0111852	1.95136	4	65	1	62649	AGTRAP
GO:MF	NAD+- protein-lysine ADP-ribosyltransferase activity	GO:0140804	0.0115329	1.93806	5	54	1	62649	PARP10
GO:MF	lipopolysaccharide immune receptor activity	GO:0001875	0.0130568	1.88416	5	62	1	62649	PTAFR
GO:MF	thiamine transmembrane transporter activity	GO:0015234	0.0130568	1.88416	4	77	1	62649	SLC25A19
GO:MF	S-methyltransferase activity	GO:0008172	0.0133826	1.87346	10	32	1	62649	METTL7B
GO:MF	EGF-domain serine glucosyltransferase activity	GO:0140561	0.0136221	1.86576	3	110	1	62649	KDELC2
GO:MF	EGF-domain serine xylosyltransferase activity	GO:0140562	0.0136221	1.86576	3	110	1	62649	KDELC2
GO:MF	peptide antigen binding	GO:0042605	0.0139326	1.85597	34	10	1	62649	TAP2
GO:MF	transcription factor binding	GO:0008134	0.0139864	1.85429	589	12	2	62649	PARP9,DTX3L
GO:MF	GDP binding	GO:0019003	0.0143578	1.84291	71	5	1	62649	GBP1
GO:MF	inositol 1,3,4,5 tetrakisphosphate binding	GO:0043533	0.0143864	1.84205	5	72	1	62649	ADAP2
GO:MF	RNA polymerase II cis-regulatory region sequence-specific DNA binding	GO:0000978	0.0143864	1.84205	1191	38	4	62649	NLRC5,BATF2,IRF1,STAT2
GO:MF	protein phosphorylated amino acid binding	GO:0045309	0.0148789	1.82743	58	124	2	62649	SYK,SOCS3
GO:MF	nucleoside diphosphate kinase activity	GO:0004550	0.0149553	1.8252	19	20	1	62649	CMPK2
GO:MF	cis-regulatory region sequence-specific DNA binding	GO:0000987	0.0149553	1.8252	1211	38	4	62649	NLRC5,BATF2,IRF1,STAT2
GO:MF	MHC protein binding	GO:0042287	0.0155546	1.80814	40	10	1	62649	TAP2
GO:MF	neurexin family protein binding	GO:0042043	0.0162263	1.78978	14	30	1	62649	SYTL1
GO:MF	MHC class II protein complex binding	GO:0023026	0.0163159	1.78739	25	17	1	62649	HLA-DOA
GO:MF	nucleoside monophosphate kinase activity	GO:0050145	0.0167848	1.77508	22	20	1	62649	CMPK2
GO:MF	complement component C1q complex binding	GO:0001849	0.0169864	1.7699	8	56	1	62649	C4A
GO:MF	GTPase activator activity	GO:0005096	0.0170385	1.76857	275	89	3	62649	ADAP2,ARHGAP18,ARHGAP27
GO:MF	enzyme-substrate adaptor activity	GO:0140767	0.0175237	1.75637	39	12	1	62649	DTX3L
GO:MF	G protein-coupled receptor activity	GO:0004930	0.0183613	1.7361	834	92	5	62649	LPAR5,PTAFR,AGTRAP,S1PR3,TMIGD3
GO:MF	ABC-type transporter activity	GO:0140359	0.018493	1.73299	50	10	1	62649	TAP2
GO:MF	receptor ligand activity	GO:0048018	0.019218	1.71629	500	99	4	62649	TNFSF13B,CXCL16,CKLF,METRNL
GO:MF	coreceptor activity involved in Wnt signaling pathway, planar cell polarity pathway	GO:1904929	0.0199525	1.7	6	91	1	62649	GPC6
GO:MF	transporter activity	GO:0005215	0.0200159	1.69862	1230	118	7	62649	CALHM6,TAP2,VMP1,SLC25A19,BEST3,KCNE3,DISP1
GO:MF	phosphatidylinositol 3-kinase regulatory subunit binding	GO:0036312	0.0200159	1.69862	11	51	1	62649	PIK3AP1
GO:MF	signaling receptor activator activity	GO:0030546	0.0200159	1.69862	508	99	4	62649	TNFSF13B,CXCL16,CKLF,METRNL
GO:MF	MHC protein complex binding	GO:0023023	0.0200159	1.69862	33	17	1	62649	HLA-DOA
GO:MF	interleukin-6 receptor binding	GO:0005138	0.020611	1.6859	7	83	1	62649	IL6R
GO:MF	laminin binding	GO:0043236	0.0208035	1.68186	27	22	1	62649	CTSS
GO:MF	sphingosine-1-phosphate receptor activity	GO:0038036	0.0208035	1.68186	8	74	1	62649	S1PR3
GO:MF	oncostatin-M receptor activity	GO:0004924	0.0208035	1.68186	6	100	1	62649	OSMR
GO:MF	leukemia inhibitory factor receptor activity	GO:0004923	0.0208035	1.68186	6	100	1	62649	OSMR
GO:MF	nuclease activity	GO:0004518	0.0208349	1.68121	215	43	2	62649	SAMHD1,HELZ2
GO:MF	tumor necrosis factor receptor binding	GO:0005164	0.0208349	1.68121	32	19	1	62649	TNFSF13B
GO:MF	heat shock protein binding	GO:0031072	0.02136	1.6704	126	5	1	62649	GBP1
GO:MF	4 iron, 4 sulfur cluster binding	GO:0051539	0.02136	1.6704	45	14	1	62649	RSAD2
GO:MF	RNA polymerase II transcription regulatory region sequence-specific DNA binding	GO:0000977	0.0216209	1.66513	1407	38	4	62649	NLRC5,BATF2,IRF1,STAT2
GO:MF	DNA-binding transcription factor activity, RNA polymerase II-specific	GO:0000981	0.0220256	1.65707	1360	61	5	62649	BATF2,IRF1,STAT2,SP110,MAFB
GO:MF	ferroxidase activity	GO:0004322	0.0221619	1.65439	6	112	1	62649	CP
GO:MF	actin binding	GO:0003779	0.0221619	1.65439	447	119	4	62649	GBP1,PPP1R18,RCSD1,FXYD5
GO:MF	oxidoreductase activity, acting on metal ions, oxygen as acceptor	GO:0016724	0.0221619	1.65439	6	112	1	62649	CP
GO:MF	fibronectin binding	GO:0001968	0.022358	1.65057	31	22	1	62649	CTSS
GO:MF	interleukin-17 receptor activity	GO:0030368	0.0237698	1.62397	9	81	1	62649	IL17RA
GO:MF	DNA-binding transcription factor activity	GO:0003700	0.0249802	1.6024	1415	61	5	62649	BATF2,IRF1,STAT2,SP110,MAFB
GO:MF	proteoglycan binding	GO:0043394	0.0255328	1.5929	36	22	1	62649	CTSS
GO:MF	transcription regulatory region nucleic acid binding	GO:0001067	0.0256534	1.59086	1506	38	4	62649	NLRC5,BATF2,IRF1,STAT2
GO:MF	transcription cis-regulatory region binding	GO:0000976	0.0256534	1.59086	1504	38	4	62649	NLRC5,BATF2,IRF1,STAT2
GO:MF	phosphotransferase activity, phosphate group as acceptor	GO:0016776	0.0256534	1.59086	40	20	1	62649	CMPK2
GO:MF	coreceptor activity involved in Wnt signaling pathway	GO:0071936	0.0257719	1.58885	9	91	1	62649	GPC6
GO:MF	adenylyltransferase activity	GO:0070566	0.0257719	1.58885	33	25	1	62649	OAS2
GO:MF	low-density lipoprotein particle receptor activity	GO:0005041	0.0257719	1.58885	15	55	1	62649	CXCL16
GO:MF	transmembrane transporter activity	GO:0022857	0.0257719	1.58885	1124	10	2	62649	CALHM6,TAP2
GO:MF	quaternary ammonium group transmembrane transporter activity	GO:0015651	0.0260658	1.58393	11	77	1	62649	SLC25A19
GO:MF	azole transmembrane transporter activity	GO:1901474	0.0260658	1.58393	11	77	1	62649	SLC25A19
GO:MF	endopeptidase activator activity	GO:0061133	0.0262681	1.58057	13	66	1	62649	VSIR
GO:MF	nucleobase-containing compound kinase activity	GO:0019205	0.0272785	1.56418	45	20	1	62649	CMPK2
GO:MF	ciliary neurotrophic factor receptor binding	GO:0005127	0.0272785	1.56418	9	100	1	62649	OSMR
GO:MF	sequence-specific double-stranded DNA binding	GO:1990837	0.0275576	1.55976	1562	38	4	62649	NLRC5,BATF2,IRF1,STAT2
GO:MF	phosphoprotein binding	GO:0051219	0.0276997	1.55752	93	124	2	62649	SYK,SOCS3
GO:MF	G protein-coupled purinergic nucleotide receptor activity	GO:0045028	0.0276997	1.55752	15	62	1	62649	PTAFR
GO:MF	tumor necrosis factor receptor superfamily binding	GO:0032813	0.0276997	1.55752	49	19	1	62649	TNFSF13B
GO:MF	phospholipid scramblase activity	GO:0017128	0.0283732	1.54709	16	60	1	62649	VMP1
GO:MF	protein self-association	GO:0043621	0.0290912	1.53624	71	14	1	62649	RSAD2
GO:MF	lipoprotein particle receptor activity	GO:0030228	0.0290912	1.53624	18	55	1	62649	CXCL16
GO:MF	ATPase-coupled transmembrane transporter activity	GO:0042626	0.029421	1.53134	101	10	1	62649	TAP2
GO:MF	metal cluster binding	GO:0051540	0.029882	1.52459	74	14	1	62649	RSAD2
GO:MF	iron-sulfur cluster binding	GO:0051536	0.029882	1.52459	74	14	1	62649	RSAD2
GO:MF	Toll-like receptor binding	GO:0035325	0.0299721	1.52328	12	87	1	62649	SYK
GO:MF	transcription coactivator activity	GO:0003713	0.0307521	1.51213	291	43	2	62649	TRIM25,HELZ2
GO:MF	arachidonate-CoA ligase activity	GO:0047676	0.0307521	1.51213	11	98	1	62649	ACSL5
GO:MF	endopeptidase regulator activity	GO:0061135	0.0314957	1.50175	192	66	2	62649	C4A,VSIR
GO:MF	sequence-specific DNA binding	GO:0043565	0.0319758	1.49518	1667	38	4	62649	NLRC5,BATF2,IRF1,STAT2
GO:MF	tumor necrosis factor receptor activity	GO:0005031	0.0327934	1.48421	10	117	1	62649	TNFRSF11A
GO:MF	opsonin binding	GO:0001846	0.0327965	1.48417	21	56	1	62649	C4A
GO:MF	bioactive lipid receptor activity	GO:0045125	0.0328708	1.48319	16	74	1	62649	S1PR3
GO:MF	xylosyltransferase activity	GO:0042285	0.0332913	1.47767	11	110	1	62649	KDELC2
GO:MF	UDP-xylosyltransferase activity	GO:0035252	0.0332913	1.47767	11	110	1	62649	KDELC2
GO:MF	extracellular matrix binding	GO:0050840	0.0337272	1.47202	56	22	1	62649	CTSS
GO:MF	voltage-gated potassium channel activity involved in ventricular cardiac muscle cell action potential repolarization	GO:1902282	0.0353146	1.45205	12	108	1	62649	KCNE3
GO:MF	UDP-glucosyltransferase activity	GO:0035251	0.0358024	1.44609	12	110	1	62649	KDELC2
GO:MF	K63-linked polyubiquitin modification-dependent protein binding	GO:0070530	0.036433	1.4385	25	54	1	62649	PARP10
GO:MF	nucleotide receptor activity	GO:0016502	0.0364853	1.43788	22	62	1	62649	PTAFR
GO:MF	purinergic nucleotide receptor activity	GO:0001614	0.0364853	1.43788	22	62	1	62649	PTAFR
GO:MF	complement binding	GO:0001848	0.0387472	1.41176	26	56	1	62649	C4A
GO:MF	death receptor activity	GO:0005035	0.0402954	1.39474	13	117	1	62649	TNFRSF11A
GO:MF	collagen binding	GO:0005518	0.0404288	1.39331	70	22	1	62649	CTSS
GO:MF	peptidase regulator activity	GO:0061134	0.0404288	1.39331	228	66	2	62649	C4A,VSIR
GO:MF	long-chain fatty acid-CoA ligase activity	GO:0004467	0.040945	1.3878	16	98	1	62649	ACSL5
GO:MF	arylsulfatase activity	GO:0004065	0.040945	1.3878	13	121	1	62649	ARSD
GO:MF	voltage-gated potassium channel activity involved in cardiac muscle cell action potential repolarization	GO:0086008	0.0419696	1.37706	15	108	1	62649	KCNE3
GO:MF	myosin V binding	GO:0031489	0.0429108	1.36743	16	104	1	62649	RAB27A
GO:MF	antigen binding	GO:0003823	0.0434087	1.36242	169	10	1	62649	TAP2
GO:MF	primary active transmembrane transporter activity	GO:0015399	0.0434789	1.36172	170	10	1	62649	TAP2
GO:MF	pattern recognition receptor activity	GO:0038187	0.0439858	1.35669	28	62	1	62649	PTAFR
GO:MF	mitogen-activated protein kinase binding	GO:0051019	0.0439858	1.35669	28	62	1	62649	PTAFR
GO:MF	oxidoreductase activity, acting on metal ions	GO:0016722	0.0452097	1.34477	16	112	1	62649	CP
GO:MF	ion channel regulator activity	GO:0099106	0.0468352	1.32943	140	119	2	62649	KCNE3,FXYD5
GO:MF	phosphatase binding	GO:0019902	0.0481816	1.31712	195	87	2	62649	PPP1R18,SYK
GO:MF	phospholipase binding	GO:0043274	0.0491675	1.30832	23	87	1	62649	SYK
GO:MF	channel regulator activity	GO:0016247	0.0491675	1.30832	145	119	2	62649	KCNE3,FXYD5
GO:MF	1-phosphatidylinositol-3-kinase regulator activity	GO:0046935	0.0491675	1.30832	16	124	1	62649	SOCS3
GO:MF	protein kinase binding	GO:0019901	0.0491675	1.30832	706	105	4	62649	PTAFR,SYK,PRAM1,ANGPT2
GO:MF	ligase activity	GO:0016874	0.0496998	1.30365	178	98	2	62649	TRIM25,ACSL5
